# Supplementary material for: Ring contraction during the 6π-electrocyclisation of naphthopyran valence tautomers
Source: Royal Society of Chemistry journal article supplement (doi:10.1039/b807744d), 2008-01-01

Ring Contraction During the  $6\pi$ -Electrocyclisation of Naphthopyran

## Valence Tautomers

Christopher D. Gabbutt<sup>†</sup>, B. Mark Heron<sup>†\*</sup>, Colin Kilner<sup>‡</sup>, Suresh B. Kolla<sup>†</sup>,  
Simon J. Coles<sup>§</sup>, Peter N. Horton<sup>§</sup> and Michael B. Hursthouse<sup>§</sup>

<sup>†</sup>Department of Colour Science, School of Chemistry, University of Leeds,  
Leeds, LS2 9JT, UK.

<sup>‡</sup>Department of Chemistry, University of Leeds, Leeds, LS2 9JT, UK.

<sup>§</sup>Department of Chemistry, University of Southampton, Highfield,  
Southampton, SO17 1BJ, UK.

b.m.heron@leeds.ac.uk

**SUPPLEMENTARY DATA****Contents**

|               |                                                                       |
|---------------|-----------------------------------------------------------------------|
| Pages 2 – 8   | Crystallographic data for <i>cis</i> -sulfoxide <b>4</b>              |
| Pages 9 – 14  | Crystallographic data for <i>trans</i> -sulfoxide <b>5</b>            |
| Pages 15 – 21 | Crystallographic data for ring contracted naphthofuran <b>6</b>       |
| Pages 22 – 28 | Crystallographic data for <i>trans</i> -sulfoxide <b>11</b>           |
| Pages 29 – 69 | <sup>1</sup> H and <sup>13</sup> C NMR spectra of selected compounds. |
| Pages 70 – 74 | Uv-visible spectra of naphthopyrans                                   |

**Table 1.** Crystal data and structure refinement for *cis*-sulfoxide (**4**) (CCDC670085)

|                                            |                                                  |                     |
|--------------------------------------------|--------------------------------------------------|---------------------|
| Empirical formula                          | C <sub>25</sub> H <sub>16</sub> O <sub>2</sub> S |                     |
| Formula weight                             | 380.44                                           |                     |
| Temperature                                | 120(2) K                                         |                     |
| Wavelength                                 | 0.71073 Å                                        |                     |
| Crystal system                             | Monoclinic                                       |                     |
| Space group                                | P2 <sub>1</sub> /n                               |                     |
| Unit cell dimensions                       | $a = 11.1939(5)$ Å                               | $\alpha = 90^\circ$ |
|                                            | $b = 14.0344(4)$ Å                               | $\beta =$           |
|                                            |                                                  | $\gamma = 90^\circ$ |
|                                            | $c = 11.7187(5)$ Å                               |                     |
| Volume                                     | 1804.06(12) Å <sup>3</sup>                       |                     |
| Z                                          | 4                                                |                     |
| Density (calculated)                       | 1.401 Mg / m <sup>3</sup>                        |                     |
| Absorption coefficient                     | 0.198 mm <sup>-1</sup>                           |                     |
| $F(000)$                                   | 792                                              |                     |
| Crystal                                    | Shard; Colourless                                |                     |
| Crystal size                               | 0.08 × 0.07 × 0.04 mm <sup>3</sup>               |                     |
| $\theta$ range for data collection         | 3.16 – 27.48°                                    |                     |
| Index ranges                               | –14 ≤ $h$ ≤ 14, –18 ≤ $k$ ≤ 16, –15 ≤ $l$ ≤ 15   |                     |
| Reflections collected                      | 21913                                            |                     |
| Independent reflections                    | 4135 [ $R_{int} = 0.0999$ ]                      |                     |
| Completeness to $\theta = 27.48^\circ$     | 99.8 %                                           |                     |
| Absorption correction                      | Semi-empirical from equivalents                  |                     |
| Max. and min. transmission                 | 0.9921 and 0.9843                                |                     |
| Refinement method                          | Full-matrix least-squares on $F^2$               |                     |
| Data / restraints / parameters             | 4135 / 0 / 253                                   |                     |
| Goodness-of-fit on $F^2$                   | 1.065                                            |                     |
| Final $R$ indices [ $F^2 > 2\sigma(F^2)$ ] | $RI = 0.0671$ , $wR2 = 0.1124$                   |                     |
| $R$ indices (all data)                     | $RI = 0.1094$ , $wR2 = 0.1255$                   |                     |
| Largest diff. peak and hole                | 0.369 and –0.361 e Å <sup>-3</sup>               |                     |

**Diffractometer:** *Nonius KappaCCD* area detector ( $\phi$  scans and  $\omega$  scans to fill *asymmetric unit* sphere). **Cell determination:** DirAx (Duisenberg, A.J.M.(1992). *J. Appl. Cryst.* 25, 92-96.) **Data collection:** Collect (Collect: Data collection software, R. Hooft, Nonius B.V., 1998). **Data reduction and cell refinement:** *Denzo* (Z. Otwinowski & W. Minor, *Methods in Enzymology* (1997) Vol. 276: *Macromolecular Crystallography*, part A, pp. 307–326; C. W. Carter, Jr. & R. M. Sweet, Eds., Academic Press). **Absorption correction:** *SADABS Version 2.10*. (G. M. Sheldrick (2003)) Bruker AXS Inc., Madison, Wisconsin, USA. **Structure solution:** *SHELXS97* (G. M. Sheldrick, *Acta Cryst.* (1990) A46 467–473). **Structure refinement:** *SHELXL97* (G. M. Sheldrick (1997), University of Göttingen, Germany). **Graphics:** *ORTEP3 for Windows* (L. J. Farrugia, *J. Appl. Crystallogr.* 1997, 30, 565).

**Special details:** All hydrogen atoms were fixed.

**Table 2.** Atomic coordinates [ $\times 10^4$ ], equivalent isotropic displacement parameters [ $\text{\AA}^2 \times 10^3$ ] and site occupancy factors.  $U_{eq}$  is defined as one third of the trace of the orthogonalized  $U^{ij}$  tensor.

| Atom | <i>x</i> | <i>y</i> | <i>z</i> | $U_{eq}$ | <i>S.o.f.</i> |
|------|----------|----------|----------|----------|---------------|
| C1   | 4114(2)  | 2467(2)  | 6498(2)  | 20(1)    | 1             |
| C2   | 5268(2)  | 2753(2)  | 6096(2)  | 21(1)    | 1             |
| C3   | 5607(2)  | 3661(2)  | 6108(2)  | 21(1)    | 1             |
| C4   | 4823(2)  | 4400(2)  | 6429(2)  | 19(1)    | 1             |
| C5   | 3648(2)  | 4143(2)  | 6477(2)  | 20(1)    | 1             |
| C6   | 2779(2)  | 4800(2)  | 6691(2)  | 23(1)    | 1             |
| C7   | 3101(3)  | 5738(2)  | 6871(2)  | 25(1)    | 1             |
| C8   | 4296(2)  | 6051(2)  | 6851(2)  | 22(1)    | 1             |
| C9   | 4636(3)  | 7021(2)  | 7044(2)  | 23(1)    | 1             |
| C10  | 5781(3)  | 7320(2)  | 7014(2)  | 25(1)    | 1             |
| C11  | 6651(2)  | 6655(2)  | 6798(2)  | 24(1)    | 1             |
| C12  | 6361(2)  | 5713(2)  | 6612(2)  | 21(1)    | 1             |
| C13  | 5173(2)  | 5380(2)  | 6632(2)  | 19(1)    | 1             |
| C14  | 3514(2)  | 1595(2)  | 5840(2)  | 19(1)    | 1             |
| C15  | 4061(2)  | 703(2)   | 6082(2)  | 20(1)    | 1             |
| C16  | 3557(3)  | -118(2)  | 5534(2)  | 25(1)    | 1             |
| C17  | 2478(3)  | -58(2)   | 4719(2)  | 28(1)    | 1             |
| C18  | 1918(3)  | 819(2)   | 4477(2)  | 29(1)    | 1             |
| C19  | 2423(3)  | 1639(2)  | 5037(2)  | 24(1)    | 1             |
| C20  | 4408(2)  | 2223(2)  | 7804(2)  | 18(1)    | 1             |
| C21  | 5012(2)  | 1374(2)  | 8158(2)  | 19(1)    | 1             |
| C22  | 5271(2)  | 1088(2)  | 9312(2)  | 23(1)    | 1             |
| C23  | 4896(3)  | 1657(2)  | 10145(2) | 25(1)    | 1             |
| C24  | 4288(3)  | 2501(2)  | 9811(2)  | 26(1)    | 1             |
| C25  | 4041(2)  | 2786(2)  | 8648(2)  | 22(1)    | 1             |
| O1   | 3233(2)  | 3218(1)  | 6290(2)  | 21(1)    | 1             |
| O11  | 5563(2)  | -384(1)  | 7593(2)  | 30(1)    | 1             |
| S1   | 5476(1)  | 599(1)   | 7105(1)  | 22(1)    | 1             |

**Table 3a.** Bond lengths [Å].

|         |            |
|---------|------------|
| C1–O1   | 1.432(3)   |
| C1–C2   | 1.515(4)   |
| C1–C14  | 1.529(3)   |
| C1–C20  | 1.538(3)   |
| C2–C3   | 1.329(3)   |
| C2–H2   | 0.9500     |
| C3–C4   | 1.455(4)   |
| C3–H3   | 0.9500     |
| C4–C5   | 1.376(4)   |
| C4–C13  | 1.437(3)   |
| C5–O1   | 1.382(3)   |
| C5–C6   | 1.399(4)   |
| C6–C7   | 1.370(4)   |
| C6–H6   | 0.9500     |
| C7–C8   | 1.413(4)   |
| C7–H7   | 0.9500     |
| C8–C9   | 1.419(3)   |
| C8–C13  | 1.421(4)   |
| C9–C10  | 1.356(4)   |
| C9–H9   | 0.9500     |
| C10–C11 | 1.408(4)   |
| C10–H10 | 0.9500     |
| C11–C12 | 1.369(3)   |
| C11–H11 | 0.9500     |
| C12–C13 | 1.413(4)   |
| C12–H12 | 0.9500     |
| C14–C19 | 1.386(4)   |
| C14–C15 | 1.398(3)   |
| C15–C16 | 1.383(4)   |
| C15–S1  | 1.792(3)   |
| C16–C17 | 1.385(4)   |
| C16–H16 | 0.9500     |
| C17–C18 | 1.385(4)   |
| C17–H17 | 0.9500     |
| C18–C19 | 1.388(4)   |
| C18–H18 | 0.9500     |
| C19–H19 | 0.9500     |
| C20–C25 | 1.390(4)   |
| C20–C21 | 1.391(3)   |
| C21–C22 | 1.385(4)   |
| C21–S1  | 1.798(3)   |
| C22–C23 | 1.390(4)   |
| C22–H22 | 0.9500     |
| C23–C24 | 1.382(4)   |
| C23–H23 | 0.9500     |
| C24–C25 | 1.395(4)   |
| C24–H24 | 0.9500     |
| C25–H25 | 0.9500     |
| O11–S1  | 1.4884(18) |

**Table 3b** Bond angles [°].

|             |            |
|-------------|------------|
| O1–C1–C2    | 110.7(2)   |
| O1–C1–C14   | 106.6(2)   |
| C2–C1–C14   | 111.8(2)   |
| O1–C1–C20   | 109.7(2)   |
| C2–C1–C20   | 110.0(2)   |
| C14–C1–C20  | 108.02(19) |
| C3–C2–C1    | 120.7(2)   |
| C3–C2–H2    | 119.7      |
| C1–C2–H2    | 119.7      |
| C2–C3–C4    | 120.0(3)   |
| C2–C3–H3    | 120.0      |
| C4–C3–H3    | 120.0      |
| C5–C4–C13   | 118.4(2)   |
| C5–C4–C3    | 117.1(2)   |
| C13–C4–C3   | 124.5(2)   |
| C4–C5–O1    | 122.3(2)   |
| C4–C5–C6    | 122.6(2)   |
| O1–C5–C6    | 115.1(2)   |
| C7–C6–C5    | 119.3(3)   |
| C7–C6–H6    | 120.3      |
| C5–C6–H6    | 120.3      |
| C6–C7–C8    | 121.2(2)   |
| C6–C7–H7    | 119.4      |
| C8–C7–H7    | 119.4      |
| C7–C8–C9    | 121.4(2)   |
| C7–C8–C13   | 119.2(2)   |
| C9–C8–C13   | 119.5(2)   |
| C10–C9–C8   | 121.2(3)   |
| C10–C9–H9   | 119.4      |
| C8–C9–H9    | 119.4      |
| C9–C10–C11  | 119.4(2)   |
| C9–C10–H10  | 120.3      |
| C11–C10–H10 | 120.3      |
| C12–C11–C10 | 121.2(3)   |
| C12–C11–H11 | 119.4      |
| C10–C11–H11 | 119.4      |
| C11–C12–C13 | 120.8(2)   |
| C11–C12–H12 | 119.6      |
| C13–C12–H12 | 119.6      |
| C12–C13–C8  | 118.0(2)   |
| C12–C13–C4  | 122.7(2)   |
| C8–C13–C4   | 119.3(2)   |
| C19–C14–C15 | 117.9(2)   |
| C19–C14–C1  | 123.1(2)   |
| C15–C14–C1  | 119.0(2)   |
| C16–C15–C14 | 122.0(2)   |
| C16–C15–S1  | 117.9(2)   |
| C14–C15–S1  | 120.09(19) |
| C15–C16–C17 | 119.3(2)   |
| C15–C16–H16 | 120.4      |
| C17–C16–H16 | 120.4      |
| C16–C17–C18 | 119.5(2)   |
| C16–C17–H17 | 120.3      |
| C18–C17–H17 | 120.3      |
| C17–C18–C19 | 121.0(3)   |
| C17–C18–H18 | 119.5      |
| C19–C18–H18 | 119.5      |
| C14–C19–C18 | 120.3(2)   |
| C14–C19–H19 | 119.8      |
| C18–C19–H19 | 119.8      |

|             |            |
|-------------|------------|
| C25–C20–C21 | 118.0(2)   |
| C25–C20–C1  | 123.1(2)   |
| C21–C20–C1  | 118.8(2)   |
| C22–C21–C20 | 122.3(2)   |
| C22–C21–S1  | 117.45(19) |
| C20–C21–S1  | 120.24(19) |
| C21–C22–C23 | 119.0(2)   |
| C21–C22–H22 | 120.5      |
| C23–C22–H22 | 120.5      |
| C24–C23–C22 | 119.6(2)   |
| C24–C23–H23 | 120.2      |
| C22–C23–H23 | 120.2      |
| C23–C24–C25 | 120.9(3)   |
| C23–C24–H24 | 119.6      |
| C25–C24–H24 | 119.6      |
| C20–C25–C24 | 120.2(2)   |
| C20–C25–H25 | 119.9      |
| C24–C25–H25 | 119.9      |
| C5–O1–C1    | 117.80(19) |
| O11–S1–C15  | 108.29(12) |
| O11–S1–C21  | 107.64(11) |
| C15–S1–C21  | 94.15(12)  |

**Table 4.** Anisotropic displacement parameters [ $\text{\AA}^2 \times 10^3$ ]. The anisotropic displacementfactor exponent takes the form:  $-2\pi^2[h^2 a^{*2} U^{11} + \dots + 2 h k a^* b^* U^{12}]$ .

| Atom | $U^{11}$ | $U^{22}$ | $U^{33}$ | $U^{23}$ | $U^{13}$ | $U^{12}$ |
|------|----------|----------|----------|----------|----------|----------|
| C1   | 21(1)    | 17(1)    | 21(1)    | -2(1)    | 3(1)     | 1(1)     |
| C2   | 25(2)    | 19(1)    | 19(1)    | 1(1)     | 5(1)     | 4(1)     |
| C3   | 21(1)    | 21(1)    | 20(1)    | 2(1)     | 3(1)     | 1(1)     |
| C4   | 22(1)    | 20(1)    | 14(1)    | 2(1)     | 2(1)     | 1(1)     |
| C5   | 26(2)    | 18(1)    | 13(1)    | 0(1)     | 0(1)     | -1(1)    |
| C6   | 21(1)    | 25(1)    | 22(1)    | 1(1)     | 2(1)     | 0(1)     |
| C7   | 27(2)    | 23(1)    | 25(1)    | 1(1)     | 6(1)     | 7(1)     |
| C8   | 28(2)    | 21(1)    | 16(1)    | 2(1)     | 4(1)     | 1(1)     |
| C9   | 29(2)    | 20(1)    | 21(1)    | -2(1)    | 7(1)     | 3(1)     |
| C10  | 34(2)    | 18(1)    | 22(1)    | -2(1)    | 2(1)     | -2(1)    |
| C11  | 22(2)    | 25(1)    | 23(1)    | 3(1)     | 2(1)     | -3(1)    |
| C12  | 20(1)    | 21(1)    | 21(1)    | 3(1)     | 3(1)     | 2(1)     |
| C13  | 27(2)    | 19(1)    | 11(1)    | 2(1)     | 2(1)     | 1(1)     |
| C14  | 22(1)    | 19(1)    | 19(1)    | 1(1)     | 7(1)     | 0(1)     |
| C15  | 21(1)    | 23(1)    | 18(1)    | -1(1)    | 7(1)     | -1(1)    |
| C16  | 31(2)    | 23(1)    | 25(2)    | -1(1)    | 11(1)    | -1(1)    |
| C17  | 32(2)    | 26(1)    | 27(2)    | -10(1)   | 8(1)     | -7(1)    |
| C18  | 27(2)    | 33(2)    | 24(2)    | -6(1)    | 1(1)     | -4(1)    |
| C19  | 26(2)    | 24(1)    | 23(1)    | 0(1)     | 5(1)     | 1(1)     |
| C20  | 16(1)    | 20(1)    | 19(1)    | 0(1)     | 3(1)     | -4(1)    |
| C21  | 17(1)    | 20(1)    | 21(1)    | -4(1)    | 4(1)     | -3(1)    |
| C22  | 22(2)    | 22(1)    | 23(1)    | 1(1)     | 2(1)     | -2(1)    |
| C23  | 31(2)    | 25(1)    | 19(1)    | 1(1)     | 4(1)     | -1(1)    |
| C24  | 31(2)    | 27(1)    | 21(1)    | -5(1)    | 8(1)     | -2(1)    |
| C25  | 23(2)    | 21(1)    | 23(1)    | 1(1)     | 3(1)     | 0(1)     |
| O1   | 21(1)    | 17(1)    | 25(1)    | -1(1)    | 3(1)     | 1(1)     |
| O11  | 41(1)    | 20(1)    | 27(1)    | 1(1)     | 5(1)     | 6(1)     |
| S1   | 24(1)    | 20(1)    | 22(1)    | -1(1)    | 4(1)     | 2(1)     |

**Table 5.** Hydrogen coordinates [ $\times 10^4$ ] and isotropic displacement parameters [ $\text{\AA}^2 \times 10^3$ ].

| Atom | <i>x</i> | <i>y</i> | <i>z</i> | <i>U</i> <sub>eq</sub> | <i>S.o.f.</i> |
|------|----------|----------|----------|------------------------|---------------|
| H2   | 5754     | 2279     | 5831     | 25                     | 1             |
| H3   | 6362     | 3828     | 5908     | 25                     | 1             |
| H6   | 1974     | 4598     | 6711     | 27                     | 1             |
| H7   | 2511     | 6185     | 7013     | 30                     | 1             |
| H9   | 4051     | 7468     | 7198     | 28                     | 1             |
| H10  | 5994     | 7973     | 7136     | 30                     | 1             |
| H11  | 7455     | 6864     | 6782     | 28                     | 1             |
| H12  | 6964     | 5278     | 6469     | 25                     | 1             |
| H16  | 3946     | -716     | 5714     | 30                     | 1             |
| H17  | 2125     | -614     | 4328     | 33                     | 1             |
| H18  | 1176     | 861      | 3919     | 34                     | 1             |
| H19  | 2020     | 2233     | 4870     | 29                     | 1             |
| H22  | 5699     | 510      | 9530     | 27                     | 1             |
| H23  | 5055     | 1468     | 10939    | 30                     | 1             |
| H24  | 4036     | 2891     | 10382    | 31                     | 1             |
| H25  | 3620     | 3367     | 8431     | 27                     | 1             |

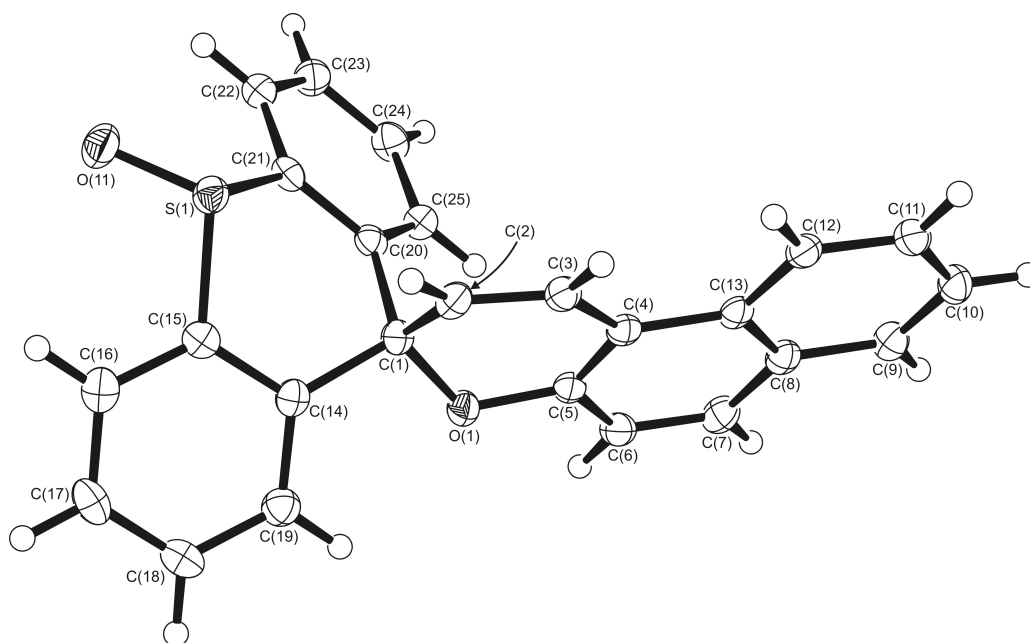View of *cis*-sulfoxide 4. Ellipsoid probability: 50%.



**Table 1.** Crystal data and structure refinement for *trans*-sulfoxide (**5**) (CCDC670086).

|                                                                               |                                                               |                     |
|-------------------------------------------------------------------------------|---------------------------------------------------------------|---------------------|
| Empirical formula                                                             | C <sub>25</sub> H <sub>16</sub> O <sub>2</sub> S              |                     |
| Formula weight                                                                | 380.44                                                        |                     |
| Temperature                                                                   | 120(2) K                                                      |                     |
| Wavelength                                                                    | 0.71073 Å                                                     |                     |
| Crystal system                                                                | Monoclinic                                                    |                     |
| Space group                                                                   | <i>P</i> 2 <sub>1</sub> / <i>n</i>                            |                     |
| Unit cell dimensions                                                          | <i>a</i> = 11.3454(2) Å                                       | $\alpha = 90^\circ$ |
|                                                                               | <i>b</i> = 13.4896(2) Å                                       | $\beta =$           |
|                                                                               |                                                               | $\gamma = 90^\circ$ |
|                                                                               | <i>c</i> = 11.5736(3) Å                                       |                     |
| Volume                                                                        | 1760.36(6) Å <sup>3</sup>                                     |                     |
| <i>Z</i>                                                                      | 4                                                             |                     |
| Density (calculated)                                                          | 1.435 Mg / m <sup>3</sup>                                     |                     |
| Absorption coefficient                                                        | 0.203 mm <sup>-1</sup>                                        |                     |
| <i>F</i> (000)                                                                | 792                                                           |                     |
| Crystal                                                                       | Prism; colourless                                             |                     |
| Crystal size                                                                  | 0.30 × 0.30 × 0.20 mm <sup>3</sup>                            |                     |
| $\theta$ range for data collection                                            | 3.02 – 27.49°                                                 |                     |
| Index ranges                                                                  | –14 ≤ <i>h</i> ≤ 14, –17 ≤ <i>k</i> ≤ 17, –15 ≤ <i>l</i> ≤ 14 |                     |
| Reflections collected                                                         | 22230                                                         |                     |
| Independent reflections                                                       | 4007 [ <i>R</i> <sub>int</sub> = 0.0303]                      |                     |
| Completeness to $\theta = 27.49^\circ$                                        | 99.3 %                                                        |                     |
| Absorption correction                                                         | Semi-empirical from equivalents                               |                     |
| Max. and min. transmission                                                    | 0.9605 and 0.9415                                             |                     |
| Refinement method                                                             | Full-matrix least-squares on <i>F</i> <sup>2</sup>            |                     |
| Data / restraints / parameters                                                | 4007 / 0 / 253                                                |                     |
| Goodness-of-fit on <i>F</i> <sup>2</sup>                                      | 1.059                                                         |                     |
| Final <i>R</i> indices [ <i>F</i> <sup>2</sup> > 2σ( <i>F</i> <sup>2</sup> )] | <i>R</i> 1 = 0.0364, <i>wR</i> 2 = 0.0930                     |                     |
| <i>R</i> indices (all data)                                                   | <i>R</i> 1 = 0.0389, <i>wR</i> 2 = 0.0948                     |                     |
| Largest diff. peak and hole                                                   | 0.360 and –0.470 e Å <sup>-3</sup>                            |                     |

**Diffractometer:** *Nonius KappaCCD* area detector ( $\phi$  scans and  $\omega$  scans to fill *asymmetric unit* sphere). **Cell determination:** DirAx (Duisenberg, A.J.M.(1992). *J. Appl. Cryst.* **25**, 92-96.) **Data collection:** Collect (Collect: Data collection software, R. Hooft, Nonius B.V., 1998). **Data reduction and cell refinement:** *Denzo* (Z. Otwinowski & W. Minor, *Methods in Enzymology* (1997) Vol. **276**: *Macromolecular Crystallography*, part A, pp. 307–326; C. W. Carter, Jr. & R. M. Sweet, Eds., Academic Press). **Absorption correction:** *SORTAV* (R. H. Blessing, *Acta Cryst.* **A51** (1995) 33–37; R. H. Blessing, *J. Appl. Cryst.* **30** (1997) 421–426). **Structure solution:** *SHELXS97* (G. M. Sheldrick, *Acta Cryst.* (1990) **A46** 467–473). **Structure refinement:** *SHELXL97* (G. M. Sheldrick (1997), University of Göttingen, Germany). **Graphics:** Cameron - A Molecular Graphics Package. (D. M. Watkin, L. Pearce and C. K. Prout, Chemical Crystallography Laboratory, University of Oxford, 1993).

**Table 2.** Atomic coordinates [ $\times 10^4$ ], equivalent isotropic displacement parameters [ $\text{\AA}^2 \times 10^3$ ] and site occupancy factors.  $U_{eq}$  is defined as one third of the trace of the orthogonalized  $U^{ij}$  tensor.

| Atom | <i>x</i> | <i>y</i> | <i>z</i> | $U_{eq}$ | <i>S.o.f.</i> |
|------|----------|----------|----------|----------|---------------|
| C1   | 5513(1)  | 1475(1)  | 6909(1)  | 15(1)    | 1             |
| C2   | 5210(1)  | 1135(1)  | 5784(1)  | 18(1)    | 1             |
| C3   | 5611(1)  | 1646(1)  | 4859(1)  | 19(1)    | 1             |
| C4   | 6267(1)  | 2506(1)  | 5074(1)  | 20(1)    | 1             |
| C5   | 6560(1)  | 2849(1)  | 6207(1)  | 18(1)    | 1             |
| C6   | 6199(1)  | 2327(1)  | 7146(1)  | 14(1)    | 1             |
| C7   | 6323(1)  | 851(1)   | 9013(1)  | 16(1)    | 1             |
| C8   | 6645(1)  | 13(1)    | 9670(1)  | 21(1)    | 1             |
| C9   | 7680(1)  | 41(1)    | 10439(1) | 25(1)    | 1             |
| C10  | 8375(1)  | 886(1)   | 10527(1) | 24(1)    | 1             |
| C11  | 8032(1)  | 1725(1)  | 9870(1)  | 21(1)    | 1             |
| C12  | 6989(1)  | 1722(1)  | 9110(1)  | 16(1)    | 1             |
| C13  | 6527(1)  | 2632(1)  | 8418(1)  | 15(1)    | 1             |
| C14  | 7338(1)  | 3515(1)  | 8544(1)  | 17(1)    | 1             |
| C15  | 6893(1)  | 4429(1)  | 8559(1)  | 17(1)    | 1             |
| C16  | 5612(1)  | 4584(1)  | 8508(1)  | 15(1)    | 1             |
| C17  | 4924(1)  | 3764(1)  | 8680(1)  | 14(1)    | 1             |
| C18  | 3689(1)  | 3830(1)  | 8715(1)  | 17(1)    | 1             |
| C19  | 3143(1)  | 4731(1)  | 8569(1)  | 18(1)    | 1             |
| C20  | 3799(1)  | 5602(1)  | 8391(1)  | 16(1)    | 1             |
| C21  | 3244(1)  | 6547(1)  | 8265(1)  | 20(1)    | 1             |
| C22  | 3891(1)  | 7387(1)  | 8129(1)  | 21(1)    | 1             |
| C23  | 5126(1)  | 7320(1)  | 8101(1)  | 21(1)    | 1             |
| C24  | 5689(1)  | 6418(1)  | 8201(1)  | 19(1)    | 1             |
| C25  | 5052(1)  | 5533(1)  | 8357(1)  | 15(1)    | 1             |
| O1   | 4823(1)  | -265(1)  | 7646(1)  | 24(1)    | 1             |
| O2   | 5414(1)  | 2842(1)  | 8899(1)  | 16(1)    | 1             |
| S1   | 4966(1)  | 781(1)   | 8059(1)  | 16(1)    | 1             |

**Table 3a.** Bond lengths [Å].

|         |            |
|---------|------------|
| C1–C2   | 1.3880(18) |
| C1–C6   | 1.3974(18) |
| C1–S1   | 1.7932(13) |
| C2–C3   | 1.3919(19) |
| C3–C4   | 1.386(2)   |
| C4–C5   | 1.3954(19) |
| C5–C6   | 1.3947(18) |
| C6–C13  | 1.5337(17) |
| C7–C8   | 1.3887(18) |
| C7–C12  | 1.3954(18) |
| C7–S1   | 1.7947(13) |
| C8–C9   | 1.393(2)   |
| C9–C10  | 1.384(2)   |
| C10–C11 | 1.395(2)   |
| C11–C12 | 1.3939(18) |
| C12–C13 | 1.5260(18) |
| C13–O2  | 1.4632(14) |
| C13–C14 | 1.5024(17) |
| C14–C15 | 1.3336(19) |
| C15–C16 | 1.4620(17) |
| C16–C17 | 1.3817(18) |
| C16–C25 | 1.4320(18) |
| C17–O2  | 1.3738(15) |
| C17–C18 | 1.4085(17) |
| C18–C19 | 1.3670(19) |
| C19–C20 | 1.4179(19) |
| C20–C21 | 1.4212(18) |
| C20–C25 | 1.4298(18) |
| C21–C22 | 1.370(2)   |
| C22–C23 | 1.408(2)   |
| C23–C24 | 1.3737(19) |
| C24–C25 | 1.4169(18) |
| O1–S1   | 1.4930(10) |

**Table 3b.** Bond angles [°].

|             |            |
|-------------|------------|
| C2–C1–C6    | 122.06(12) |
| C2–C1–S1    | 116.94(10) |
| C6–C1–S1    | 120.99(10) |
| C1–C2–C3    | 119.33(12) |
| C4–C3–C2    | 119.44(12) |
| C3–C4–C5    | 120.87(12) |
| C6–C5–C4    | 120.36(12) |
| C5–C6–C1    | 117.88(12) |
| C5–C6–C13   | 123.48(12) |
| C1–C6–C13   | 118.64(11) |
| C8–C7–C12   | 122.28(12) |
| C8–C7–S1    | 116.73(10) |
| C12–C7–S1   | 120.96(10) |
| C7–C8–C9    | 118.70(13) |
| C10–C9–C8   | 120.16(13) |
| C9–C10–C11  | 120.41(13) |
| C12–C11–C10 | 120.51(13) |
| C11–C12–C7  | 117.90(12) |
| C11–C12–C13 | 123.18(12) |
| C7–C12–C13  | 118.88(11) |
| O2–C13–C14  | 110.73(10) |
| O2–C13–C12  | 102.55(10) |
| C14–C13–C12 | 114.55(11) |
| O2–C13–C6   | 106.85(10) |
| C14–C13–C6  | 112.73(10) |
| C12–C13–C6  | 108.71(10) |
| C15–C14–C13 | 120.41(11) |
| C14–C15–C16 | 120.48(12) |
| C17–C16–C25 | 118.88(12) |
| C17–C16–C15 | 117.08(12) |
| C25–C16–C15 | 123.94(12) |
| O2–C17–C16  | 121.80(11) |
| O2–C17–C18  | 115.82(11) |
| C16–C17–C18 | 122.27(12) |
| C19–C18–C17 | 119.41(12) |
| C18–C19–C20 | 121.16(12) |
| C19–C20–C21 | 121.62(12) |
| C19–C20–C25 | 119.30(12) |
| C21–C20–C25 | 119.07(12) |
| C22–C21–C20 | 121.15(12) |
| C21–C22–C23 | 119.78(13) |
| C24–C23–C22 | 120.67(13) |
| C23–C24–C25 | 121.18(12) |
| C24–C25–C20 | 118.14(12) |
| C24–C25–C16 | 122.87(12) |
| C20–C25–C16 | 118.98(12) |
| C17–O2–C13  | 117.02(10) |
| O1–S1–C1    | 106.89(6)  |
| O1–S1–C7    | 107.57(6)  |
| C1–S1–C7    | 94.87(6)   |

**Table 4.** Anisotropic displacement parameters [ $\text{\AA}^2 \times 10^3$ ]. The anisotropic displacementfactor exponent takes the form:  $-2\pi^2[h^2 a^{*2} U^{11} + \dots + 2 h k a^* b^* U^{12}]$ .

| Atom | $U^{11}$ | $U^{22}$ | $U^{33}$ | $U^{23}$ | $U^{13}$ | $U^{12}$ |
|------|----------|----------|----------|----------|----------|----------|
| C1   | 13(1)    | 16(1)    | 15(1)    | 1(1)     | 2(1)     | 2(1)     |
| C2   | 17(1)    | 17(1)    | 19(1)    | -1(1)    | 0(1)     | 2(1)     |
| C3   | 21(1)    | 22(1)    | 15(1)    | -1(1)    | 1(1)     | 5(1)     |
| C4   | 23(1)    | 22(1)    | 17(1)    | 4(1)     | 6(1)     | 3(1)     |
| C5   | 19(1)    | 17(1)    | 19(1)    | 1(1)     | 4(1)     | 0(1)     |
| C6   | 14(1)    | 15(1)    | 15(1)    | -1(1)    | 2(1)     | 2(1)     |
| C7   | 18(1)    | 18(1)    | 13(1)    | -1(1)    | 2(1)     | 2(1)     |
| C8   | 29(1)    | 18(1)    | 15(1)    | 0(1)     | 3(1)     | 3(1)     |
| C9   | 34(1)    | 23(1)    | 16(1)    | 2(1)     | 0(1)     | 9(1)     |
| C10  | 24(1)    | 30(1)    | 18(1)    | -2(1)    | -4(1)    | 7(1)     |
| C11  | 20(1)    | 24(1)    | 18(1)    | -3(1)    | 0(1)     | 1(1)     |
| C12  | 17(1)    | 17(1)    | 13(1)    | -2(1)    | 2(1)     | 2(1)     |
| C13  | 14(1)    | 16(1)    | 16(1)    | -1(1)    | 3(1)     | 1(1)     |
| C14  | 14(1)    | 19(1)    | 18(1)    | -1(1)    | 2(1)     | -2(1)    |
| C15  | 15(1)    | 19(1)    | 17(1)    | -2(1)    | 2(1)     | -3(1)    |
| C16  | 15(1)    | 17(1)    | 12(1)    | -1(1)    | 1(1)     | -1(1)    |
| C17  | 16(1)    | 16(1)    | 11(1)    | -2(1)    | 1(1)     | 0(1)     |
| C18  | 16(1)    | 19(1)    | 15(1)    | -1(1)    | 2(1)     | -4(1)    |
| C19  | 14(1)    | 22(1)    | 18(1)    | -2(1)    | 2(1)     | -1(1)    |
| C20  | 17(1)    | 19(1)    | 12(1)    | -1(1)    | 0(1)     | 1(1)     |
| C21  | 20(1)    | 22(1)    | 17(1)    | -1(1)    | 1(1)     | 4(1)     |
| C22  | 28(1)    | 18(1)    | 16(1)    | 1(1)     | 1(1)     | 5(1)     |
| C23  | 28(1)    | 17(1)    | 18(1)    | 1(1)     | 3(1)     | -2(1)    |
| C24  | 20(1)    | 19(1)    | 18(1)    | 0(1)     | 3(1)     | -2(1)    |
| C25  | 17(1)    | 17(1)    | 12(1)    | -1(1)    | 2(1)     | -1(1)    |
| O1   | 30(1)    | 17(1)    | 23(1)    | 1(1)     | -1(1)    | -7(1)    |
| O2   | 15(1)    | 15(1)    | 18(1)    | 0(1)     | 4(1)     | 1(1)     |
| S1   | 17(1)    | 17(1)    | 16(1)    | 2(1)     | 2(1)     | -3(1)    |

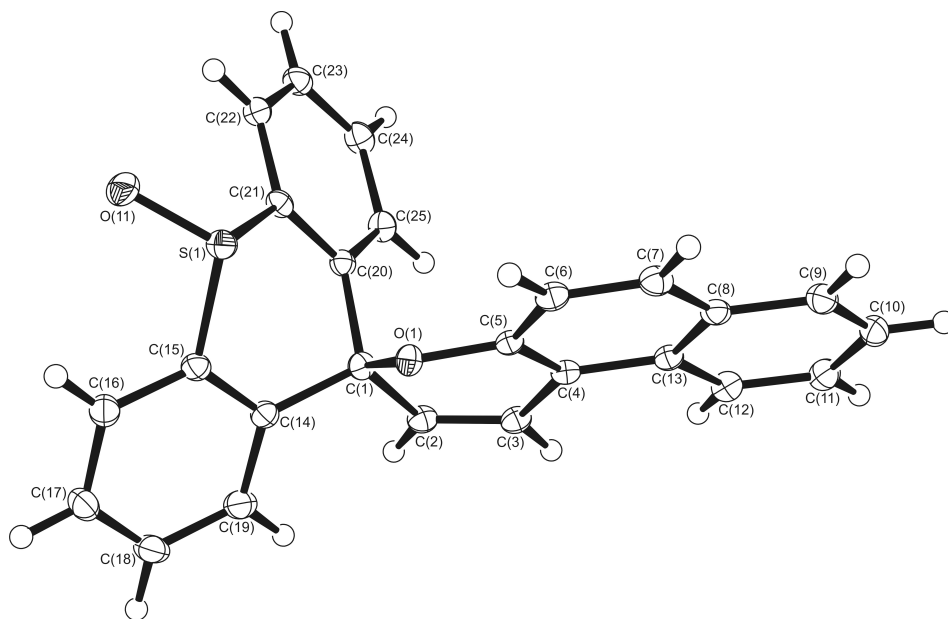

View of *trans*-sulfoxide **5**. Ellipsoid probability: 50%.

Table 1. Crystal data and structure refinement for compound (6) (CCDC661552)

|                                                     |                                                                 |                             |
|-----------------------------------------------------|-----------------------------------------------------------------|-----------------------------|
| Formula                                             | C <sub>25</sub> H <sub>16</sub> O <sub>3</sub> S                |                             |
| Formula weight                                      | 396.44                                                          |                             |
| Size                                                | 0.31 x 0.20 x 0.08 mm                                           |                             |
| Crystal morphology                                  | Pale brown plate                                                |                             |
| Temperature                                         | 150(2) K                                                        |                             |
| Wavelength                                          | 0.71073 Å [Mo-K <sub>α</sub> ]                                  |                             |
| Crystal system                                      | Monoclinic                                                      |                             |
| Space group                                         | P2 <sub>1</sub> /n                                              |                             |
| Unit cell dimensions                                | $a = 7.97170(10)$ Å                                             | $\alpha = 90^\circ$         |
|                                                     | $b = 20.6854(3)$ Å                                              | $\beta = 101.1430(7)^\circ$ |
|                                                     | $c = 11.1804(2)$ Å                                              | $\gamma = 90^\circ$         |
| Volume                                              | 1808.87(5) Å <sup>3</sup>                                       |                             |
| Z                                                   | 4                                                               |                             |
| Density (calculated)                                | 1.456 Mg/m <sup>3</sup>                                         |                             |
| Absorption coefficient                              | 0.205 mm <sup>-1</sup>                                          |                             |
| <i>F</i> (000)                                      | 824                                                             |                             |
| Data collection range                               | 2.71 ≤ $\theta$ ≤ 26°                                           |                             |
| Index ranges                                        | -9 ≤ <i>h</i> ≤ 9, -25 ≤ <i>k</i> ≤ 25, -13 ≤ <i>l</i> ≤ 13     |                             |
| Reflections collected                               | 34563                                                           |                             |
| Independent reflections                             | 3553 [ <i>R</i> (int) = 0.084]                                  |                             |
| Observed reflections                                | 3006 [ <i>I</i> > 2σ( <i>I</i> )]                               |                             |
| Absorption correction                               | none                                                            |                             |
| Refinement method                                   | Full                                                            |                             |
| Data / restraints / parameters                      | 3553 / 0 / 262                                                  |                             |
| Goodness of fit                                     | 1.058                                                           |                             |
| Final <i>R</i> indices [ <i>I</i> > 2σ( <i>I</i> )] | <i>R</i> <sub>1</sub> = 0.0396, <i>wR</i> <sub>2</sub> = 0.1011 |                             |
| <i>R</i> indices (all data)                         | <i>R</i> <sub>1</sub> = 0.0483, <i>wR</i> <sub>2</sub> = 0.1084 |                             |
| Largest diff. peak and hole                         | 0.298 and -0.545 e.Å <sup>-3</sup>                              |                             |

Table 2. Atomic co-ordinates ( $\times 10^4$ ) and equivalent isotropic displacement parameters ( $\text{\AA}^2 \times 10^4$ ) with standard uncertainties (s.u.s) in parentheses.  $U_{\text{eq}}$  is defined as  $1/3$  of the trace of the orthogonalized  $U_{ij}$  tensor.

|       | x          | y           | z          | $U_{\text{eq}}$ |
|-------|------------|-------------|------------|-----------------|
| C(2)  | 489(2)     | 1308.2(8)   | 5886.9(15) | 235(3)          |
| C(3)  | -433(2)    | 772.3(8)    | 6141.0(16) | 274(4)          |
| C(4)  | -1040(2)   | 756.0(9)    | 7224.0(17) | 319(4)          |
| C(5)  | -707(2)    | 1267.5(9)   | 8030.5(17) | 332(4)          |
| C(6)  | 225(2)     | 1799.2(9)   | 7769.5(16) | 303(4)          |
| C(7)  | 838(2)     | 1830.7(8)   | 6685.2(15) | 250(4)          |
| C(8)  | 1929(2)    | 2404.6(8)   | 6435.3(15) | 249(4)          |
| C(9)  | 3376(2)    | 2207.3(8)   | 5800.9(15) | 247(3)          |
| C(10) | 4977(2)    | 2494.9(8)   | 6130.7(16) | 290(4)          |
| C(11) | 6332(2)    | 2295.7(9)   | 5605.3(16) | 310(4)          |
| C(12) | 6118(2)    | 1807.4(9)   | 4735.7(16) | 302(4)          |
| C(13) | 4538(2)    | 1513.4(8)   | 4391.9(15) | 269(4)          |
| C(14) | 3188(2)    | 1720.4(8)   | 4923.1(15) | 237(3)          |
| C(81) | 899(2)     | 2947.9(8)   | 5757.9(15) | 252(4)          |
| C(83) | -906(2)    | 3763.2(8)   | 5669.5(15) | 258(4)          |
| C(84) | -2032(2)   | 4223.3(8)   | 5989.9(16) | 299(4)          |
| C(85) | -2557(2)   | 4702.6(8)   | 5160.9(16) | 313(4)          |
| C(86) | -2008(2)   | 4735.5(8)   | 4019.2(16) | 292(4)          |
| C(87) | -2518(2)   | 5248.6(9)   | 3187.9(17) | 340(4)          |
| C(88) | -1984(2)   | 5275.0(9)   | 2098.5(17) | 363(4)          |
| C(89) | -918(2)    | 4791.8(9)   | 1777.1(17) | 353(4)          |
| C(90) | -399(2)    | 4283.9(9)   | 2553.5(16) | 310(4)          |
| C(91) | -911(2)    | 4247.8(8)   | 3694.4(15) | 269(4)          |
| C(92) | -360(2)    | 3751.9(8)   | 4570.6(15) | 258(4)          |
| C(93) | 800(2)     | 3213.6(8)   | 4643.3(16) | 265(4)          |
| O(1)  | 37.2(15)   | 1737.4(6)   | 3664.9(11) | 317(3)          |
| O(2)  | 1478.9(16) | 687.0(6)    | 4082.9(11) | 319(3)          |
| O(82) | -145.4(14) | 3272.4(5)   | 6417.5(10) | 263(3)          |
| S(1)  | 1195.2(5)  | 1330.79(19) | 4492.4(4)  | 243.5(14)       |



Table 3. Anisotropic displacement parameters ( $\text{\AA}^2 \times 10^3$ ). The anisotropic displacement factor exponent takes the form:

$$-2\pi^2[h^2a^{*2}U_{11} + \dots + 2hk a^* b^* U_{12}]$$

|       | $U_{11}$ | $U_{22}$ | $U_{33}$ | $U_{23}$  | $U_{13}$ | $U_{12}$  |
|-------|----------|----------|----------|-----------|----------|-----------|
| C(2)  | 230(8)   | 229(8)   | 245(8)   | 16(6)     | 44(6)    | 22(6)     |
| C(3)  | 256(8)   | 229(8)   | 330(9)   | 22(7)     | 43(7)    | 8(6)      |
| C(4)  | 324(9)   | 258(9)   | 400(10)  | 72(8)     | 132(8)   | 12(7)     |
| C(5)  | 382(10)  | 320(10)  | 328(9)   | 68(8)     | 154(8)   | 64(8)     |
| C(6)  | 370(10)  | 254(9)   | 298(9)   | 3(7)      | 96(7)    | 54(7)     |
| C(7)  | 253(8)   | 218(8)   | 272(8)   | 27(6)     | 35(7)    | 33(6)     |
| C(8)  | 280(8)   | 213(8)   | 249(8)   | -20(6)    | 41(7)    | -3(6)     |
| C(9)  | 269(8)   | 213(8)   | 251(8)   | 28(6)     | 27(7)    | 10(6)     |
| C(10) | 301(9)   | 251(9)   | 295(9)   | -16(7)    | 4(7)     | -29(7)    |
| C(11) | 238(8)   | 301(9)   | 370(10)  | 38(8)     | 8(7)     | -25(7)    |
| C(12) | 271(9)   | 286(9)   | 356(9)   | 45(7)     | 83(7)    | 34(7)     |
| C(13) | 300(8)   | 236(8)   | 279(9)   | 19(7)     | 72(7)    | 14(7)     |
| C(14) | 244(8)   | 215(8)   | 243(8)   | 23(6)     | 25(6)    | -10(6)    |
| C(81) | 252(8)   | 200(8)   | 310(9)   | -40(7)    | 70(7)    | -15(6)    |
| C(83) | 270(8)   | 208(8)   | 289(9)   | 0(7)      | 36(7)    | -26(6)    |
| C(84) | 297(9)   | 293(9)   | 312(9)   | -23(7)    | 69(7)    | 15(7)     |
| C(85) | 279(9)   | 256(9)   | 389(10)  | -29(8)    | 30(7)    | 35(7)     |
| C(86) | 254(8)   | 252(9)   | 339(9)   | -11(7)    | -19(7)   | -31(7)    |
| C(87) | 303(9)   | 248(9)   | 427(10)  | 9(8)      | -32(8)   | -6(7)     |
| C(88) | 369(10)  | 294(10)  | 377(10)  | 83(8)     | -51(8)   | -66(8)    |
| C(89) | 385(10)  | 347(10)  | 308(9)   | 28(8)     | 17(8)    | -101(8)   |
| C(90) | 327(9)   | 278(9)   | 314(9)   | -2(7)     | 31(7)    | -49(7)    |
| C(91) | 259(8)   | 234(8)   | 297(9)   | -19(7)    | 12(7)    | -60(7)    |
| C(92) | 254(8)   | 216(8)   | 294(9)   | -25(7)    | 30(7)    | -39(6)    |
| C(93) | 291(8)   | 214(8)   | 301(9)   | -12(7)    | 83(7)    | -11(7)    |
| O(1)  | 302(6)   | 353(7)   | 278(6)   | 37(5)     | 12(5)    | -18(5)    |
| O(2)  | 382(7)   | 243(6)   | 351(7)   | -80(5)    | 118(5)   | -57(5)    |
| O(82) | 297(6)   | 215(6)   | 280(6)   | -4(5)     | 66(5)    | 15(5)     |
| S(1)  | 260(2)   | 230(2)   | 239(2)   | -14.9(16) | 44.4(16) | -30.7(15) |

Table 4. Hydrogen atom co-ordinates ( $\times 10^3$ ) and isotropic displacement parameters ( $\text{\AA}^2 \times 10^2$ ) with s.u.s in parentheses.

|       | x      | y     | z     | $U_{\text{eq}}$ |
|-------|--------|-------|-------|-----------------|
| H(3)  | -646.  | 422.  | 5582. | 33.             |
| H(4)  | -1680. | 395.  | 7410. | 38.             |
| H(5)  | -1121. | 1255. | 8772. | 40.             |
| H(6)  | 447.   | 2145. | 8337. | 36.             |
| H(8)  | 2479.  | 2582. | 7249. | 30.             |
| H(10) | 5144.  | 2831. | 6721. | 35.             |
| H(11) | 7418.  | 2496. | 5843. | 37.             |
| H(12) | 7052.  | 1676. | 4379. | 36.             |
| H(13) | 4377.  | 1176. | 3804. | 32.             |
| H(84) | -2410. | 4203. | 6744. | 36.             |
| H(85) | -3313. | 5025. | 5350. | 38.             |
| H(87) | -3241. | 5579. | 3391. | 41.             |
| H(88) | -2338. | 5623. | 1554. | 44.             |
| H(89) | -552.  | 4816. | 1019. | 42.             |
| H(90) | 307.   | 3955. | 2322. | 37.             |
| H(93) | 1384.  | 3073. | 4026. | 32.             |

Table 5. Interatomic distances ( $\text{\AA}$ ) with s.u.s in parentheses.

|             |            |             |            |
|-------------|------------|-------------|------------|
| C(2)-C(3)   | 1.389(2)   | C(2)-C(7)   | 1.395(2)   |
| C(2)-S(1)   | 1.7578(16) | C(3)-C(4)   | 1.388(2)   |
| C(4)-C(5)   | 1.382(3)   | C(5)-C(6)   | 1.389(3)   |
| C(6)-C(7)   | 1.394(2)   | C(7)-C(8)   | 1.529(2)   |
| C(8)-C(81)  | 1.507(2)   | C(8)-C(9)   | 1.522(2)   |
| C(9)-C(10)  | 1.392(2)   | C(9)-C(14)  | 1.394(2)   |
| C(10)-C(11) | 1.388(2)   | C(11)-C(12) | 1.390(3)   |
| C(12)-C(13) | 1.384(2)   | C(13)-C(14) | 1.393(2)   |
| C(14)-S(1)  | 1.7635(16) | C(81)-C(93) | 1.350(2)   |
| C(81)-O(82) | 1.3871(19) | C(83)-O(82) | 1.379(2)   |
| C(83)-C(92) | 1.380(2)   | C(83)-C(84) | 1.401(2)   |
| C(84)-C(85) | 1.367(2)   | C(85)-C(86) | 1.429(2)   |
| C(86)-C(87) | 1.418(2)   | C(86)-C(91) | 1.427(2)   |
| C(87)-C(88) | 1.367(3)   | C(88)-C(89) | 1.403(3)   |
| C(89)-C(90) | 1.375(3)   | C(90)-C(91) | 1.414(2)   |
| C(91)-C(92) | 1.428(2)   | C(92)-C(93) | 1.440(2)   |
| O(1)-S(1)   | 1.4441(12) | O(2)-S(1)   | 1.4402(12) |

Table 6. Angles between interatomic vectors (°) with s.u.s in parentheses.

---

|                   |            |                   |            |
|-------------------|------------|-------------------|------------|
| C(3)-C(2)-C(7)    | 122.38(15) | C(3)-C(2)-S(1)    | 118.38(13) |
| C(7)-C(2)-S(1)    | 119.22(12) | C(4)-C(3)-C(2)    | 119.00(16) |
| C(5)-C(4)-C(3)    | 119.68(16) | C(4)-C(5)-C(6)    | 120.79(16) |
| C(5)-C(6)-C(7)    | 120.76(17) | C(6)-C(7)-C(2)    | 117.38(15) |
| C(6)-C(7)-C(8)    | 120.19(15) | C(2)-C(7)-C(8)    | 122.35(14) |
| C(81)-C(8)-C(9)   | 110.76(13) | C(81)-C(8)-C(7)   | 113.38(13) |
| C(9)-C(8)-C(7)    | 112.70(13) | C(10)-C(9)-C(14)  | 117.62(15) |
| C(10)-C(9)-C(8)   | 120.04(15) | C(14)-C(9)-C(8)   | 122.28(15) |
| C(11)-C(10)-C(9)  | 120.64(16) | C(10)-C(11)-C(12) | 120.76(16) |
| C(13)-C(12)-C(11) | 119.73(16) | C(12)-C(13)-C(14) | 118.86(16) |
| C(13)-C(14)-C(9)  | 122.38(15) | C(13)-C(14)-S(1)  | 118.20(13) |
| C(9)-C(14)-S(1)   | 119.40(12) | C(93)-C(81)-O(82) | 111.09(15) |
| C(93)-C(81)-C(8)  | 134.12(15) | O(82)-C(81)-C(8)  | 114.74(13) |
| O(82)-C(83)-C(92) | 110.49(14) | O(82)-C(83)-C(84) | 124.97(15) |
| C(92)-C(83)-C(84) | 124.51(16) | C(85)-C(84)-C(83) | 116.54(16) |
| C(84)-C(85)-C(86) | 122.27(16) | C(87)-C(86)-C(91) | 118.33(16) |
| C(87)-C(86)-C(85) | 121.53(16) | C(91)-C(86)-C(85) | 120.14(15) |
| C(88)-C(87)-C(86) | 121.01(17) | C(87)-C(88)-C(89) | 120.53(17) |
| C(90)-C(89)-C(88) | 120.39(17) | C(89)-C(90)-C(91) | 120.39(17) |
| C(90)-C(91)-C(86) | 119.34(16) | C(90)-C(91)-C(92) | 123.54(16) |
| C(86)-C(91)-C(92) | 117.11(15) | C(83)-C(92)-C(91) | 119.37(15) |
| C(83)-C(92)-C(93) | 105.80(15) | C(91)-C(92)-C(93) | 134.70(16) |
| C(81)-C(93)-C(92) | 106.79(15) | C(83)-O(82)-C(81) | 105.80(12) |
| O(2)-S(1)-O(1)    | 117.08(8)  | O(2)-S(1)-C(2)    | 110.75(7)  |
| O(1)-S(1)-C(2)    | 108.00(7)  | O(2)-S(1)-C(14)   | 108.71(8)  |
| O(1)-S(1)-C(14)   | 109.84(7)  | C(2)-S(1)-C(14)   | 101.31(8)  |

---

Table 7. Torsion angles (°) with s.u.s in parentheses.

|                         |             |                         |             |
|-------------------------|-------------|-------------------------|-------------|
| C(7)-C(2)-C(3)-C(4)     | 0.4(2)      | S(1)-C(2)-C(3)-C(4)     | -178.25(13) |
| C(2)-C(3)-C(4)-C(5)     | -0.5(3)     | C(3)-C(4)-C(5)-C(6)     | 0.1(3)      |
| C(4)-C(5)-C(6)-C(7)     | 0.4(3)      | C(5)-C(6)-C(7)-C(2)     | -0.4(2)     |
| C(5)-C(6)-C(7)-C(8)     | -177.28(16) | C(3)-C(2)-C(7)-C(6)     | 0.1(2)      |
| S(1)-C(2)-C(7)-C(6)     | 178.71(12)  | C(3)-C(2)-C(7)-C(8)     | 176.84(15)  |
| S(1)-C(2)-C(7)-C(8)     | -4.5(2)     | C(6)-C(7)-C(8)-C(81)    | -91.71(18)  |
| C(2)-C(7)-C(8)-C(81)    | 91.61(18)   | C(6)-C(7)-C(8)-C(9)     | 141.46(16)  |
| C(2)-C(7)-C(8)-C(9)     | -35.2(2)    | C(81)-C(8)-C(9)-C(10)   | 91.41(18)   |
| C(7)-C(8)-C(9)-C(10)    | -140.38(16) | C(81)-C(8)-C(9)-C(14)   | -91.58(18)  |
| C(7)-C(8)-C(9)-C(14)    | 36.6(2)     | C(14)-C(9)-C(10)-C(11)  | -0.5(2)     |
| C(8)-C(9)-C(10)-C(11)   | 176.60(15)  | C(9)-C(10)-C(11)-C(12)  | 0.3(3)      |
| C(10)-C(11)-C(12)-C(13) | -0.3(3)     | C(11)-C(12)-C(13)-C(14) | 0.6(2)      |
| C(12)-C(13)-C(14)-C(9)  | -0.9(2)     | C(12)-C(13)-C(14)-S(1)  | -178.95(13) |
| C(10)-C(9)-C(14)-C(13)  | 0.8(2)      | C(8)-C(9)-C(14)-C(13)   | -176.23(15) |
| C(10)-C(9)-C(14)-S(1)   | 178.91(12)  | C(8)-C(9)-C(14)-S(1)    | 1.8(2)      |
| C(9)-C(8)-C(81)-C(93)   | 13.2(3)     | C(7)-C(8)-C(81)-C(93)   | -114.6(2)   |
| C(9)-C(8)-C(81)-O(82)   | -163.87(13) | C(7)-C(8)-C(81)-O(82)   | 68.28(18)   |
| O(82)-C(83)-C(84)-C(85) | 175.23(15)  | C(92)-C(83)-C(84)-C(85) | -2.6(3)     |
| C(83)-C(84)-C(85)-C(86) | 0.5(3)      | C(84)-C(85)-C(86)-C(87) | -177.77(16) |
| C(84)-C(85)-C(86)-C(91) | 1.8(3)      | C(91)-C(86)-C(87)-C(88) | 0.4(2)      |
| C(85)-C(86)-C(87)-C(88) | 179.99(16)  | C(86)-C(87)-C(88)-C(89) | 0.1(3)      |
| C(87)-C(88)-C(89)-C(90) | 0.2(3)      | C(88)-C(89)-C(90)-C(91) | -1.1(3)     |
| C(89)-C(90)-C(91)-C(86) | 1.6(2)      | C(89)-C(90)-C(91)-C(92) | -177.00(16) |
| C(87)-C(86)-C(91)-C(90) | -1.3(2)     | C(85)-C(86)-C(91)-C(90) | 179.17(15)  |
| C(87)-C(86)-C(91)-C(92) | 177.42(15)  | C(85)-C(86)-C(91)-C(92) | -2.2(2)     |
| O(82)-C(83)-C(92)-C(91) | -175.90(14) | C(84)-C(83)-C(92)-C(91) | 2.2(3)      |
| O(82)-C(83)-C(92)-C(93) | 0.63(18)    | C(84)-C(83)-C(92)-C(93) | 178.69(16)  |
| C(90)-C(91)-C(92)-C(83) | 178.90(15)  | C(86)-C(91)-C(92)-C(83) | 0.3(2)      |
| C(90)-C(91)-C(92)-C(93) | 3.6(3)      | C(86)-C(91)-C(92)-C(93) | -175.02(17) |
| O(82)-C(81)-C(93)-C(92) | 0.89(19)    | C(8)-C(81)-C(93)-C(92)  | -176.26(17) |
| C(83)-C(92)-C(93)-C(81) | -0.91(18)   | C(91)-C(92)-C(93)-C(81) | 174.83(18)  |
| C(92)-C(83)-O(82)-C(81) | -0.11(17)   | C(84)-C(83)-O(82)-C(81) | -           |
| 178.16(16)              |             |                         |             |
| C(93)-C(81)-O(82)-C(83) | -0.50(18)   | C(8)-C(81)-O(82)-C(83)  | 177.24(13)  |
| C(3)-C(2)-S(1)-O(2)     | -29.02(15)  | C(7)-C(2)-S(1)-O(2)     | 152.29(13)  |
| C(3)-C(2)-S(1)-O(1)     | 100.39(14)  | C(7)-C(2)-S(1)-O(1)     | -78.30(14)  |
| C(3)-C(2)-S(1)-C(14)    | -144.21(13) | C(7)-C(2)-S(1)-C(14)    | 37.10(14)   |
| C(13)-C(14)-S(1)-O(2)   | 25.58(15)   | C(9)-C(14)-S(1)-O(2)    | -152.56(13) |
| C(13)-C(14)-S(1)-O(1)   | -103.70(14) | C(9)-C(14)-S(1)-O(1)    | 78.16(14)   |
| C(13)-C(14)-S(1)-C(2)   | 142.28(13)  | C(9)-C(14)-S(1)-C(2)    | -35.86(14)  |

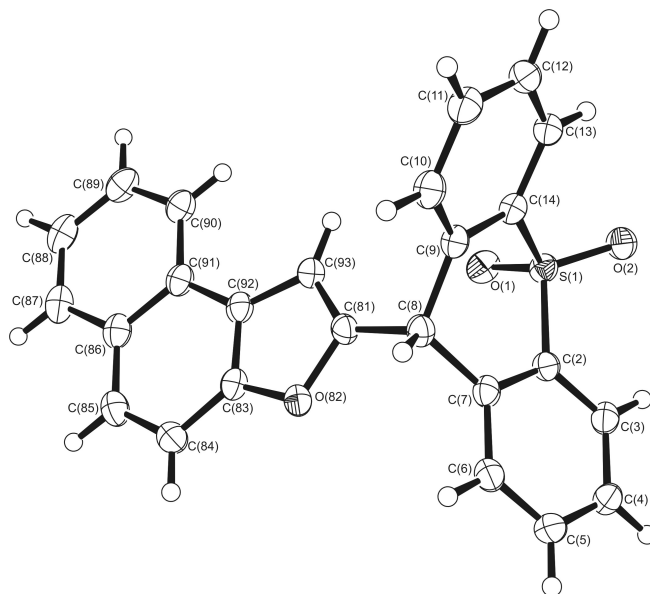

View of compound **6**. Ellipsoid probability: 50%.

Table 1. Crystal data and structure refinement for *trans*-sulfoxide (**11**)  
(CCDC663292)

|                                                     |                                                                 |                           |
|-----------------------------------------------------|-----------------------------------------------------------------|---------------------------|
| Formula                                             | C <sub>25</sub> H <sub>16</sub> O <sub>2</sub> S                |                           |
| Formula weight                                      | 380.44                                                          |                           |
| Size                                                | 0.29 x 0.26 x 0.21 mm                                           |                           |
| Crystal morphology                                  | Pale brown fragment                                             |                           |
| Temperature                                         | 150K                                                            |                           |
| Wavelength                                          | 0.71073 Å [Mo-K <sub>α</sub> ]                                  |                           |
| Crystal system                                      | Monoclinic                                                      |                           |
| Space group                                         | C2/c                                                            |                           |
| Unit cell dimensions                                | $a = 19.3719(8)$ Å                                              | $\alpha = 90^\circ$       |
|                                                     | $b = 11.5100(5)$ Å                                              | $\beta = 99.926(2)^\circ$ |
|                                                     | $c = 16.4409(6)$ Å                                              | $\gamma = 90^\circ$       |
| Volume                                              | 3611.0(3) Å <sup>3</sup>                                        |                           |
| Z                                                   | 8                                                               |                           |
| Density (calculated)                                | 1.4 Mg/m <sup>3</sup>                                           |                           |
| Absorption coefficient                              | 0.198 mm <sup>-1</sup>                                          |                           |
| <i>F</i> (000)                                      | 1584                                                            |                           |
| Data collection range                               | 2.32 ≤ $\theta$ ≤ 28.3°                                         |                           |
| Index ranges                                        | -25 ≤ <i>h</i> ≤ 25, -15 ≤ <i>k</i> ≤ 15, -18 ≤ <i>l</i> ≤ 21   |                           |
| Reflections collected                               | 29976                                                           |                           |
| Independent reflections                             | 4465 [ <i>R</i> (int) = 0.0437]                                 |                           |
| Observed reflections                                | 3671 [ <i>I</i> > 2σ( <i>I</i> )]                               |                           |
| Absorption correction                               | none                                                            |                           |
| Refinement method                                   | Full                                                            |                           |
| Data / restraints / parameters                      | 4465 / 0 / 253                                                  |                           |
| Goodness of fit                                     | 1.025                                                           |                           |
| Final <i>R</i> indices [ <i>I</i> > 2σ( <i>I</i> )] | <i>R</i> <sub>1</sub> = 0.0370, <i>wR</i> <sub>2</sub> = 0.0875 |                           |
| <i>R</i> indices (all data)                         | <i>R</i> <sub>1</sub> = 0.0486, <i>wR</i> <sub>2</sub> = 0.0936 |                           |
| Largest diff. peak and hole                         | 0.309 and -0.541 e.Å <sup>-3</sup>                              |                           |

Table 2. Atomic co-ordinates ( $\times 10^4$ ) and equivalent isotropic displacement parameters ( $\text{\AA}^2 \times 10^4$ ) with standard uncertainties (s.u.s) in parentheses.  $U_{\text{eq}}$  is defined as  $1/3$  of the trace of the orthogonalized  $U_{ij}$  tensor.

|       | x           | y         | z         | $U_{\text{eq}}$ |
|-------|-------------|-----------|-----------|-----------------|
| S(1)  | 40111.4(18) | 63846(3)  | 14996(2)  | 207.8(10)       |
| O(15) | 40050(5)    | 39201(8)  | 21656(6)  | 189(2)          |
| C(2)  | 38939(7)    | 63744(12) | 25552(8)  | 205(3)          |
| C(16) | 40353(7)    | 27615(11) | 19756(8)  | 184(3)          |
| O(1)  | 39697(6)    | 76173(9)  | 12188(7)  | 332(3)          |
| C(7)  | 35791(7)    | 54362(12) | 28826(8)  | 205(3)          |
| C(17) | 45482(7)    | 24407(11) | 15004(8)  | 197(3)          |
| C(9)  | 29334(7)    | 47862(11) | 15067(8)  | 190(3)          |
| C(14) | 31891(7)    | 57117(11) | 10960(8)  | 183(3)          |
| C(25) | 36162(7)    | 19587(12) | 22749(9)  | 244(3)          |
| C(18) | 49577(7)    | 32629(12) | 11557(9)  | 221(3)          |
| C(8)  | 33418(7)    | 43876(11) | 23385(8)  | 197(3)          |
| C(27) | 29510(7)    | 35077(13) | 27616(9)  | 260(3)          |
| C(26) | 30882(8)    | 23829(13) | 27307(10) | 284(3)          |
| C(10) | 23252(7)    | 42396(13) | 11221(9)  | 258(3)          |
| C(3)  | 41629(8)    | 73144(13) | 30391(9)  | 267(3)          |
| C(24) | 37233(9)    | 7643(13)  | 21263(10) | 315(4)          |
| C(13) | 28409(7)    | 61113(12) | 3411(9)   | 223(3)          |
| C(6)  | 35218(8)    | 54808(14) | 37137(9)  | 297(3)          |
| C(22) | 46405(8)    | 12325(12) | 13615(9)  | 258(3)          |
| C(12) | 22276(8)    | 55646(13) | -261(9)   | 268(3)          |
| C(11) | 19785(8)    | 46257(14) | 3570(10)  | 301(3)          |
| C(19) | 54298(8)    | 29004(14) | 6784(9)   | 284(3)          |
| C(21) | 51530(9)    | 9032(14)  | 8865(10)  | 339(4)          |
| C(23) | 42216(9)    | 4093(12)  | 16907(10) | 319(4)          |
| C(5)  | 37853(9)    | 64183(16) | 42012(10) | 360(4)          |
| C(20) | 55291(9)    | 17107(15) | 5468(10)  | 347(4)          |
| C(4)  | 41113(9)    | 73225(15) | 38698(10) | 333(4)          |

Table 3. Anisotropic displacement parameters ( $\text{\AA}^2 \times 10^3$ ). The anisotropic displacement factor exponent takes the form:

$$-2\pi^2[h^2a^{*2}U_{11} + \dots + 2hk a^* b^* U_{12}]$$

|       | $U_{11}$  | $U_{22}$  | $U_{33}$  | $U_{23}$ | $U_{13}$ | $U_{12}$  |
|-------|-----------|-----------|-----------|----------|----------|-----------|
| S(1)  | 237.0(18) | 189.5(16) | 206.2(18) | 5.8(13)  | 64.5(13) | -34.5(13) |
| O(15) | 167(4)    | 151(4)    | 260(5)    | 15(4)    | 66(4)    | 8(3)      |
| C(2)  | 198(6)    | 216(6)    | 202(7)    | -13(5)   | 34(5)    | 51(5)     |
| C(16) | 206(6)    | 155(6)    | 172(6)    | 22(5)    | -21(5)   | -1(5)     |
| O(1)  | 482(7)    | 211(5)    | 296(6)    | 53(4)    | 44(5)    | -92(5)    |
| C(7)  | 200(6)    | 233(7)    | 185(7)    | 8(5)     | 40(5)    | 55(5)     |
| C(17) | 218(6)    | 181(6)    | 169(6)    | -16(5)   | -34(5)   | 14(5)     |
| C(9)  | 184(6)    | 191(6)    | 207(7)    | 3(5)     | 63(5)    | 29(5)     |
| C(14) | 190(6)    | 182(6)    | 189(6)    | -24(5)   | 67(5)    | 19(5)     |
| C(25) | 250(7)    | 213(7)    | 246(7)    | 55(6)    | -22(6)   | -56(5)    |
| C(18) | 214(7)    | 232(6)    | 211(7)    | -30(5)   | 19(5)    | 11(5)     |
| C(8)  | 178(6)    | 205(6)    | 218(7)    | 38(5)    | 67(5)    | 16(5)     |
| C(27) | 199(7)    | 321(8)    | 274(8)    | 94(6)    | 79(6)    | -14(6)    |
| C(26) | 239(7)    | 312(8)    | 295(8)    | 128(6)   | 32(6)    | -85(6)    |
| C(10) | 212(7)    | 279(7)    | 287(8)    | 28(6)    | 54(6)    | -26(6)    |
| C(3)  | 251(7)    | 245(7)    | 291(8)    | -55(6)   | 3(6)     | 32(6)     |
| C(24) | 383(9)    | 196(7)    | 324(8)    | 62(6)    | -59(7)   | -103(6)   |
| C(13) | 264(7)    | 226(7)    | 194(7)    | 15(5)    | 85(5)    | 45(5)     |
| C(6)  | 312(8)    | 383(9)    | 206(7)    | 44(6)    | 69(6)    | 55(6)     |
| C(22) | 340(8)    | 206(7)    | 183(7)    | -47(5)   | -78(6)   | 42(6)     |
| C(12) | 255(7)    | 350(8)    | 193(7)    | 9(6)     | 18(6)    | 58(6)     |
| C(11) | 218(7)    | 380(9)    | 288(8)    | -11(7)   | -2(6)    | -28(6)    |
| C(19) | 268(7)    | 361(8)    | 225(7)    | -35(6)   | 48(6)    | 35(6)     |
| C(21) | 485(10)   | 276(8)    | 220(8)    | -88(6)   | -37(7)   | 141(7)    |
| C(23) | 465(9)    | 154(6)    | 286(8)    | -28(6)   | -85(7)   | -13(6)    |
| C(5)  | 399(9)    | 494(10)   | 180(7)    | -46(7)   | 31(6)    | 123(8)    |
| C(20) | 382(9)    | 424(9)    | 228(8)    | -74(7)   | 37(7)    | 153(7)    |
| C(4)  | 340(8)    | 358(8)    | 273(8)    | -125(7)  | -26(6)   | 80(7)     |



Table 4. Hydrogen atom co-ordinates ( $\times 10^3$ ) and isotropic displacement parameters ( $\text{\AA}^2 \times 10^2$ ) with s.u.s in parentheses.

|       | x     | y     | z     | $U_{\text{eq}}$ |
|-------|-------|-------|-------|-----------------|
| H(18) | 4905. | 4068. | 1256. | 27.             |
| H(27) | 2599. | 3764. | 3057. | 31.             |
| H(26) | 2838. | 1847. | 3010. | 34.             |
| H(10) | 2144. | 3598. | 1382. | 31.             |
| H(3)  | 4379. | 7942. | 2804. | 32.             |
| H(24) | 3441. | 200.  | 2335. | 38.             |
| H(13) | 3020. | 6752. | 78.   | 27.             |
| H(6)  | 3300. | 4862. | 3951. | 36.             |
| H(12) | 1980. | 5836. | -540. | 32.             |
| H(11) | 1566. | 4238. | 96.   | 36.             |
| H(19) | 5692. | 3458. | 434.  | 34.             |
| H(21) | 5236. | 102.  | 804.  | 41.             |
| H(23) | 4289. | -397. | 1607. | 38.             |
| H(5)  | 3741. | 6437. | 4767. | 43.             |
| H(20) | 5861. | 1469. | 218.  | 42.             |
| H(4)  | 4301. | 7952. | 4210. | 40.             |

Table 5. Interatomic distances ( $\text{\AA}$ ) with s.u.s in parentheses.

|             |            |             |            |
|-------------|------------|-------------|------------|
| S(1)-O(1)   | 1.4900(11) | S(1)-C(2)   | 1.7887(14) |
| S(1)-C(14)  | 1.7922(14) | O(15)-C(16) | 1.3731(15) |
| O(15)-C(8)  | 1.4652(16) | C(2)-C(3)   | 1.3900(19) |
| C(2)-C(7)   | 1.393(2)   | C(16)-C(25) | 1.3758(19) |
| C(16)-C(17) | 1.415(2)   | C(7)-C(6)   | 1.391(2)   |
| C(7)-C(8)   | 1.5253(19) | C(17)-C(18) | 1.415(2)   |
| C(17)-C(22) | 1.4255(18) | C(9)-C(10)  | 1.3881(19) |
| C(9)-C(14)  | 1.3969(19) | C(9)-C(8)   | 1.5276(18) |
| C(14)-C(13) | 1.3851(19) | C(25)-C(24) | 1.418(2)   |
| C(25)-C(26) | 1.453(2)   | C(18)-C(19) | 1.369(2)   |
| C(8)-C(27)  | 1.5049(19) | C(27)-C(26) | 1.324(2)   |
| C(10)-C(11) | 1.393(2)   | C(3)-C(4)   | 1.387(2)   |
| C(24)-C(23) | 1.360(3)   | C(13)-C(12) | 1.387(2)   |
| C(6)-C(5)   | 1.388(2)   | C(22)-C(23) | 1.415(2)   |
| C(22)-C(21) | 1.416(2)   | C(12)-C(11) | 1.379(2)   |
| C(19)-C(20) | 1.405(2)   | C(21)-C(20) | 1.359(3)   |
| C(5)-C(4)   | 1.377(3)   |             |            |

Table 6. Angles between interatomic vectors (°) with s.u.s in parentheses.

---

|                   |            |                   |            |
|-------------------|------------|-------------------|------------|
| O(1)-S(1)-C(2)    | 107.33(6)  | O(1)-S(1)-C(14)   | 107.45(6)  |
| C(2)-S(1)-C(14)   | 95.92(6)   | C(16)-O(15)-C(8)  | 118.30(10) |
| C(3)-C(2)-C(7)    | 121.88(14) | C(3)-C(2)-S(1)    | 116.90(11) |
| C(7)-C(2)-S(1)    | 121.14(10) | O(15)-C(16)-C(25) | 121.33(13) |
| O(15)-C(16)-C(17) | 116.15(11) | C(25)-C(16)-C(17) | 122.42(13) |
| C(6)-C(7)-C(2)    | 117.74(13) | C(6)-C(7)-C(8)    | 122.57(13) |
| C(2)-C(7)-C(8)    | 119.63(12) | C(16)-C(17)-C(18) | 122.84(12) |
| C(16)-C(17)-C(22) | 117.56(13) | C(18)-C(17)-C(22) | 119.60(13) |
| C(10)-C(9)-C(14)  | 117.99(12) | C(10)-C(9)-C(8)   | 122.66(12) |
| C(14)-C(9)-C(8)   | 119.31(12) | C(13)-C(14)-C(9)  | 121.86(13) |
| C(13)-C(14)-S(1)  | 116.92(10) | C(9)-C(14)-S(1)   | 121.14(10) |
| C(16)-C(25)-C(24) | 118.47(15) | C(16)-C(25)-C(26) | 118.04(13) |
| C(24)-C(25)-C(26) | 123.49(14) | C(19)-C(18)-C(17) | 120.13(14) |
| O(15)-C(8)-C(27)  | 111.74(11) | O(15)-C(8)-C(7)   | 102.64(10) |
| C(27)-C(8)-C(7)   | 112.72(12) | O(15)-C(8)-C(9)   | 105.83(10) |
| C(27)-C(8)-C(9)   | 113.06(11) | C(7)-C(8)-C(9)    | 110.16(11) |
| C(26)-C(27)-C(8)  | 121.32(14) | C(27)-C(26)-C(25) | 120.81(13) |
| C(9)-C(10)-C(11)  | 120.41(14) | C(4)-C(3)-C(2)    | 119.03(15) |
| C(23)-C(24)-C(25) | 121.35(14) | C(14)-C(13)-C(12) | 119.18(13) |
| C(5)-C(6)-C(7)    | 120.81(15) | C(23)-C(22)-C(21) | 122.32(14) |
| C(23)-C(22)-C(17) | 119.74(14) | C(21)-C(22)-C(17) | 117.95(14) |
| C(11)-C(12)-C(13) | 119.84(13) | C(12)-C(11)-C(10) | 120.68(14) |
| C(18)-C(19)-C(20) | 120.54(15) | C(20)-C(21)-C(22) | 121.32(14) |
| C(24)-C(23)-C(22) | 120.42(13) | C(4)-C(5)-C(6)    | 120.47(15) |
| C(21)-C(20)-C(19) | 120.40(15) | C(5)-C(4)-C(3)    | 120.03(15) |

---

Table 7. Torsion angles (°) with s.u.s in parentheses.

|                         |             |                         |             |
|-------------------------|-------------|-------------------------|-------------|
| O(1)-S(1)-C(2)-C(3)     | -34.24(12)  | C(14)-S(1)-C(2)-C(3)    | -144.62(11) |
| O(1)-S(1)-C(2)-C(7)     | 148.95(11)  | C(14)-S(1)-C(2)-C(7)    | 38.58(12)   |
| C(8)-O(15)-C(16)-C(25)  | -28.59(17)  | C(8)-O(15)-C(16)-C(17)  | 155.09(11)  |
| C(3)-C(2)-C(7)-C(6)     | 1.9(2)      | S(1)-C(2)-C(7)-C(6)     | 178.50(10)  |
| C(3)-C(2)-C(7)-C(8)     | -175.47(12) | S(1)-C(2)-C(7)-C(8)     | 1.17(17)    |
| O(15)-C(16)-C(17)-C(18) | -6.94(18)   | C(25)-C(16)-C(17)-C(18) | 176.79(13)  |
| O(15)-C(16)-C(17)-C(22) | 173.95(11)  | C(25)-C(16)-C(17)-C(22) | -2.32(19)   |
| C(10)-C(9)-C(14)-C(13)  | 2.3(2)      | C(8)-C(9)-C(14)-C(13)   | -179.92(12) |
| C(10)-C(9)-C(14)-S(1)   | -174.31(10) | C(8)-C(9)-C(14)-S(1)    | 3.51(17)    |
| O(1)-S(1)-C(14)-C(13)   | 31.97(12)   | C(2)-S(1)-C(14)-C(13)   | 142.25(11)  |
| O(1)-S(1)-C(14)-C(9)    | -151.30(11) | C(2)-S(1)-C(14)-C(9)    | -41.03(12)  |
| O(15)-C(16)-C(25)-C(24) | -173.61(12) | C(17)-C(16)-C(25)-C(24) | 2.5(2)      |
| O(15)-C(16)-C(25)-C(26) | 6.13(19)    | C(17)-C(16)-C(25)-C(26) | -177.78(12) |
| C(16)-C(17)-C(18)-C(19) | -177.82(13) | C(22)-C(17)-C(18)-C(19) | 1.3(2)      |
| C(16)-O(15)-C(8)-C(27)  | 33.83(16)   | C(16)-O(15)-C(8)-C(7)   | 154.86(10)  |
| C(16)-O(15)-C(8)-C(9)   | -89.63(13)  | C(6)-C(7)-C(8)-O(15)    | -111.96(14) |
| C(2)-C(7)-C(8)-O(15)    | 65.23(14)   | C(6)-C(7)-C(8)-C(27)    | 8.39(18)    |
| C(2)-C(7)-C(8)-C(27)    | -174.41(12) | C(6)-C(7)-C(8)-C(9)     | 135.69(13)  |
| C(2)-C(7)-C(8)-C(9)     | -47.11(16)  | C(10)-C(9)-C(8)-O(15)   | 111.86(14)  |
| C(14)-C(9)-C(8)-O(15)   | -65.85(15)  | C(10)-C(9)-C(8)-C(27)   | -10.76(19)  |
| C(14)-C(9)-C(8)-C(27)   | 171.53(12)  | C(10)-C(9)-C(8)-C(7)    | -137.87(13) |
| C(14)-C(9)-C(8)-C(7)    | 44.41(16)   | O(15)-C(8)-C(27)-C(26)  | -19.60(19)  |
| C(7)-C(8)-C(27)-C(26)   | -134.58(14) | C(9)-C(8)-C(27)-C(26)   | 99.67(16)   |
| C(8)-C(27)-C(26)-C(25)  | -0.9(2)     | C(16)-C(25)-C(26)-C(27) | 8.9(2)      |
| C(24)-C(25)-C(26)-C(27) | -171.36(14) | C(14)-C(9)-C(10)-C(11)  | -1.2(2)     |
| C(8)-C(9)-C(10)-C(11)   | -178.95(13) | C(7)-C(2)-C(3)-C(4)     | -0.5(2)     |
| S(1)-C(2)-C(3)-C(4)     | -177.30(11) | C(16)-C(25)-C(24)-C(23) | -0.7(2)     |
| C(26)-C(25)-C(24)-C(23) | 179.52(14)  | C(9)-C(14)-C(13)-C(12)  | -1.2(2)     |
| S(1)-C(14)-C(13)-C(12)  | 175.47(10)  | C(2)-C(7)-C(6)-C(5)     | -1.5(2)     |
| C(8)-C(7)-C(6)-C(5)     | 175.76(14)  | C(16)-C(17)-C(22)-C(23) | 0.47(19)    |
| C(18)-C(17)-C(22)-C(23) | -178.67(12) | C(16)-C(17)-C(22)-C(21) | -179.99(12) |
| C(18)-C(17)-C(22)-C(21) | 0.87(19)    | C(14)-C(13)-C(12)-C(11) | -0.9(2)     |
| C(13)-C(12)-C(11)-C(10) | 1.9(2)      | C(9)-C(10)-C(11)-C(12)  | -0.8(2)     |
| C(17)-C(18)-C(19)-C(20) | -2.0(2)     | C(23)-C(22)-C(21)-C(20) | 177.18(14)  |
| C(17)-C(22)-C(21)-C(20) | -2.3(2)     | C(25)-C(24)-C(23)-C(22) | -1.0(2)     |
| C(21)-C(22)-C(23)-C(24) | -178.36(14) | C(17)-C(22)-C(23)-C(24) | 1.2(2)      |
| C(7)-C(6)-C(5)-C(4)     | -0.2(2)     | C(22)-C(21)-C(20)-C(19) | 1.7(2)      |
| C(18)-C(19)-C(20)-C(21) | 0.6(2)      | C(6)-C(5)-C(4)-C(3)     | 1.6(2)      |
| C(2)-C(3)-C(4)-C(5)     | -1.2(2)     |                         |             |

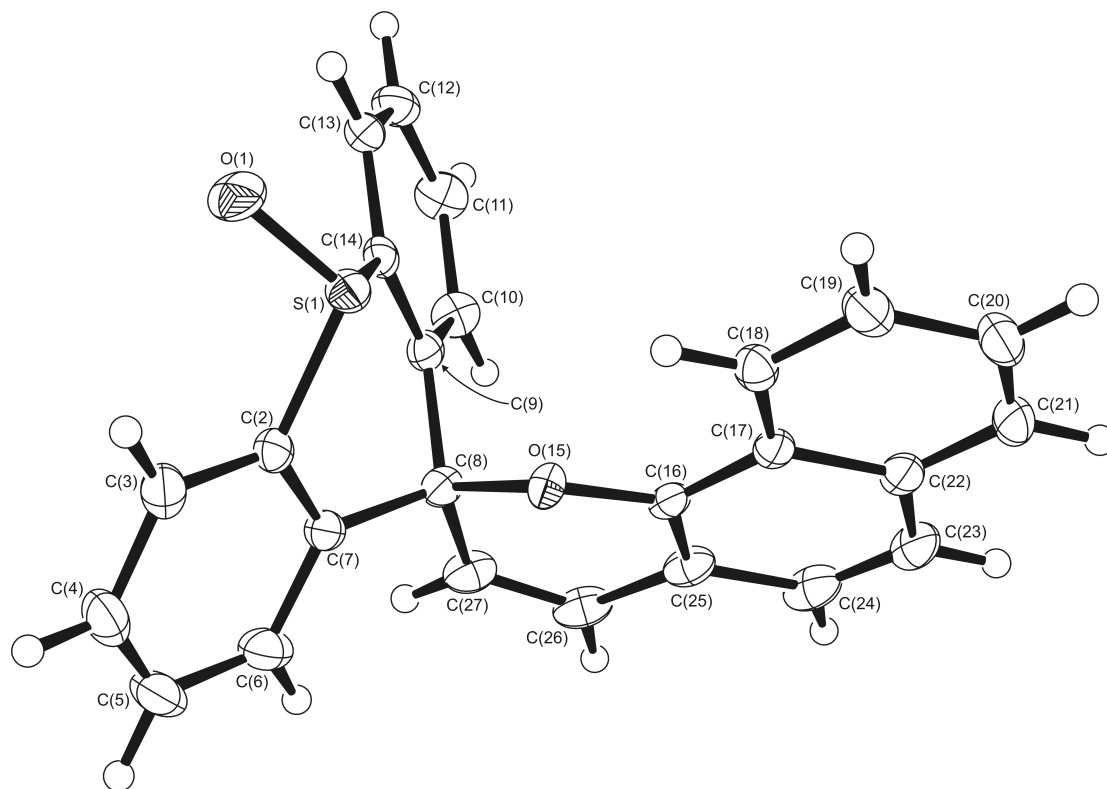

View of *trans*-sulfoxide (11). Ellipsoid probability: 50%.

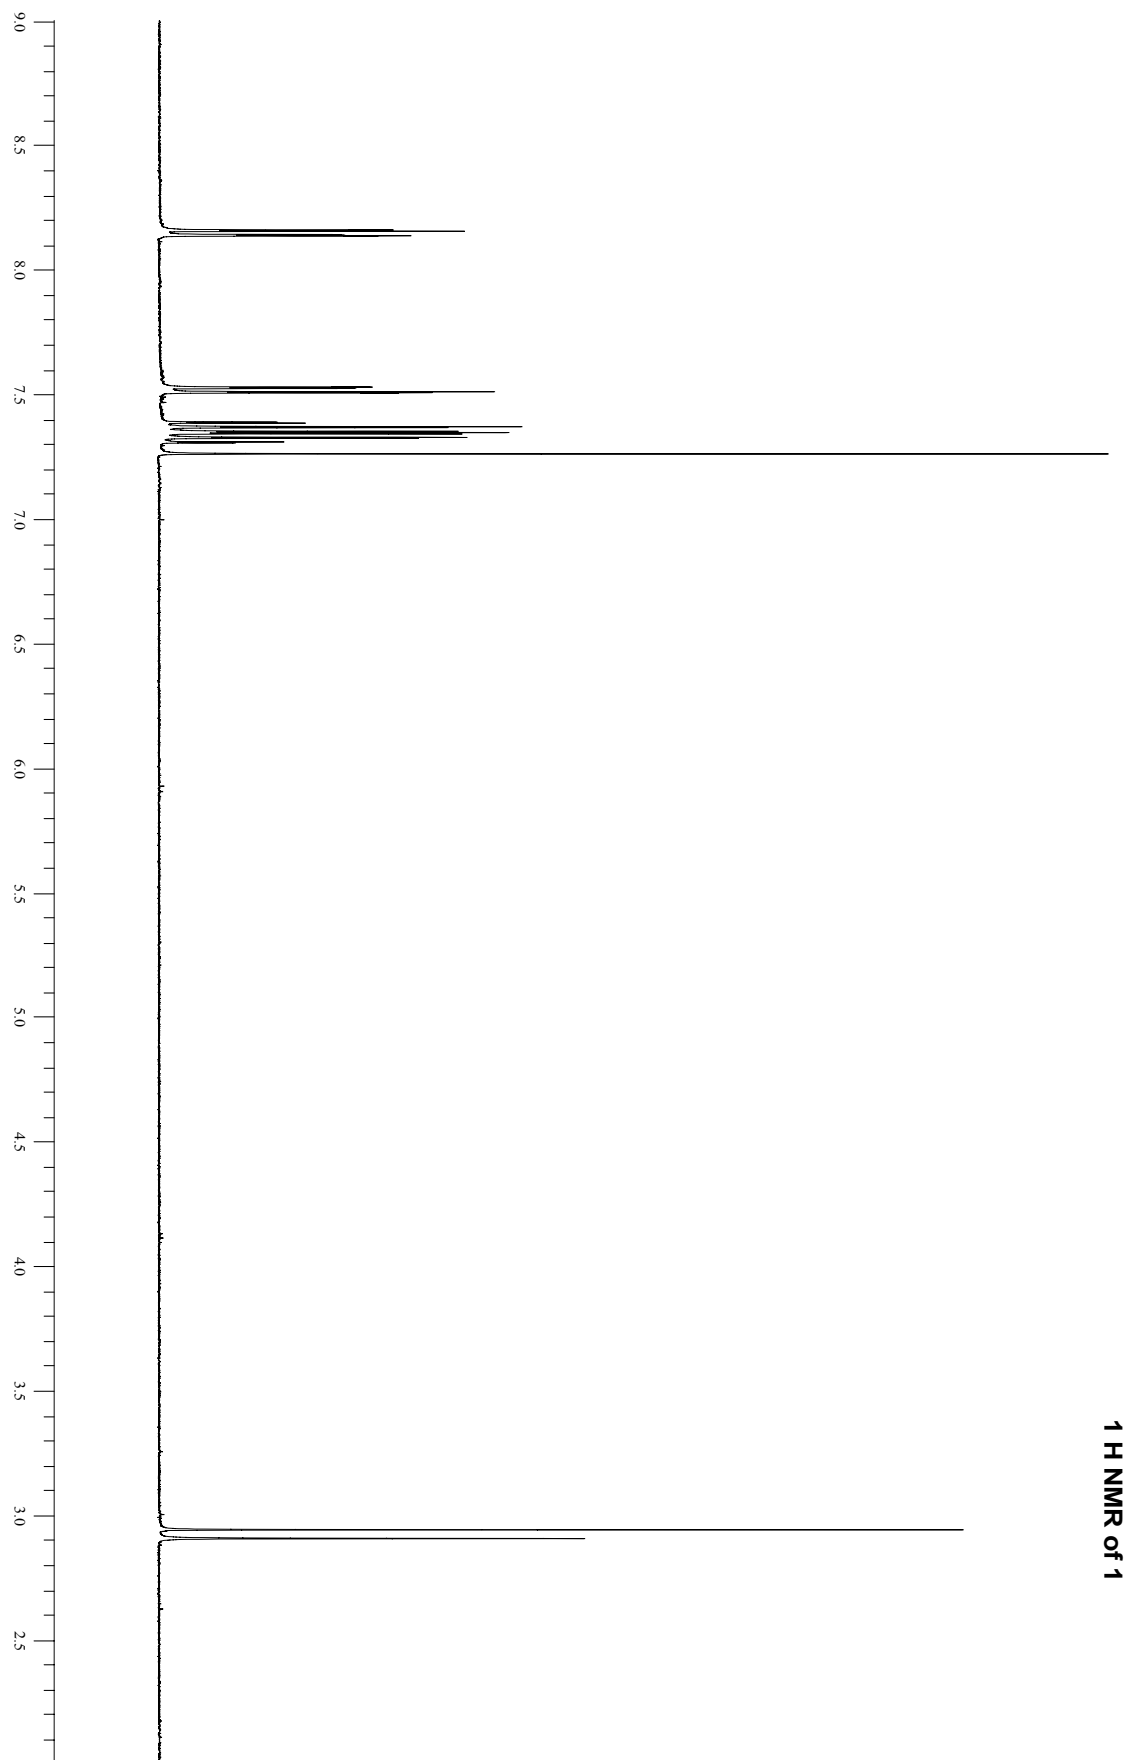

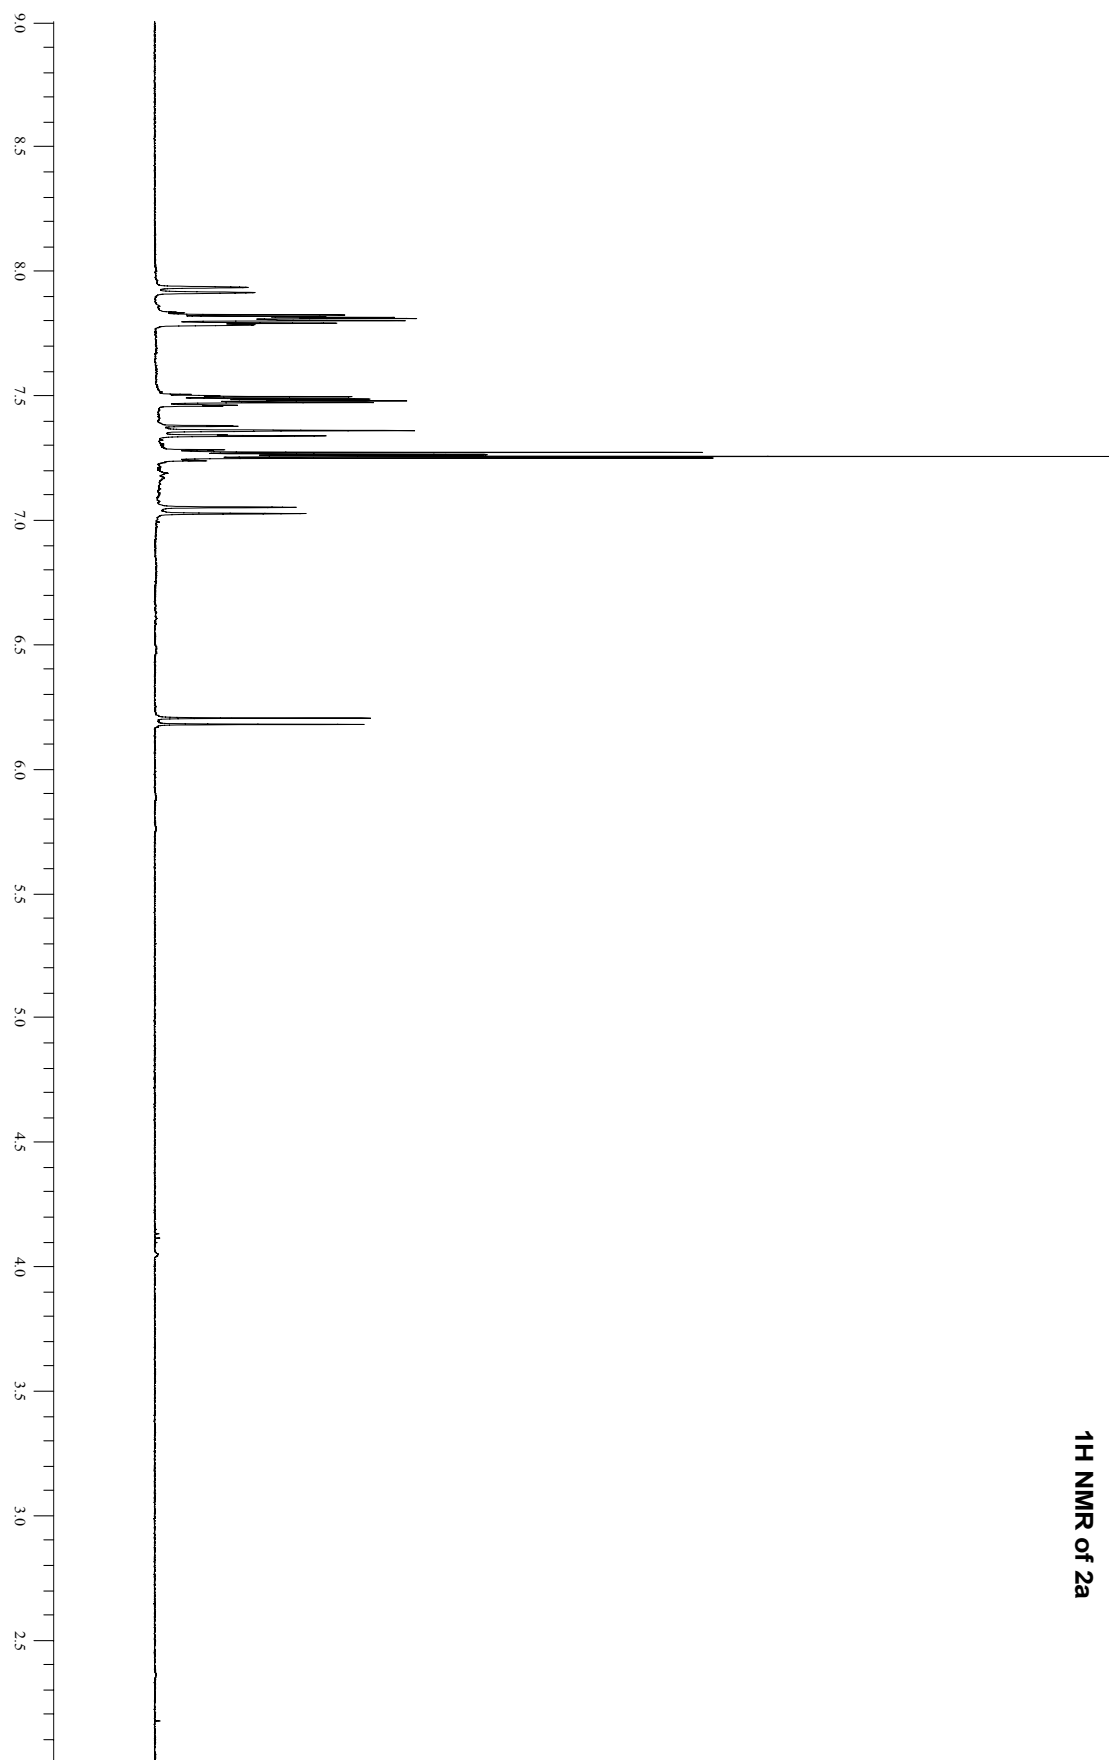

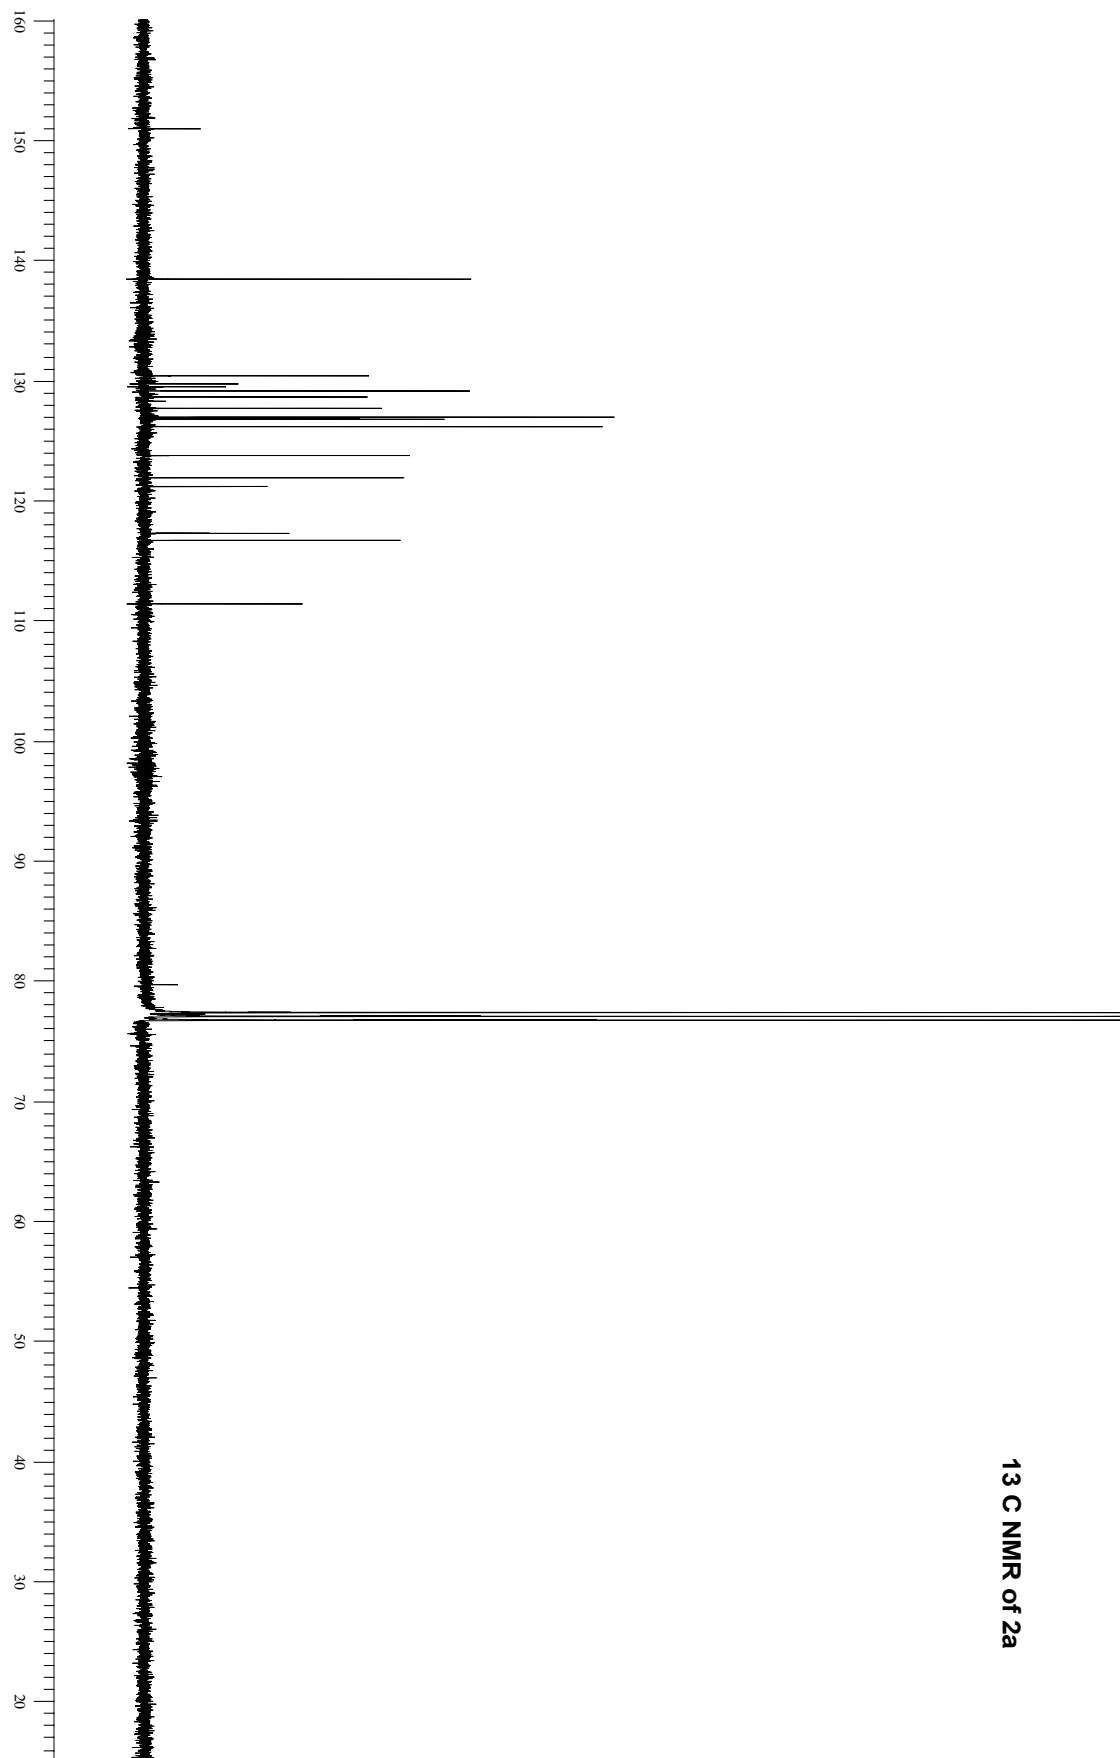

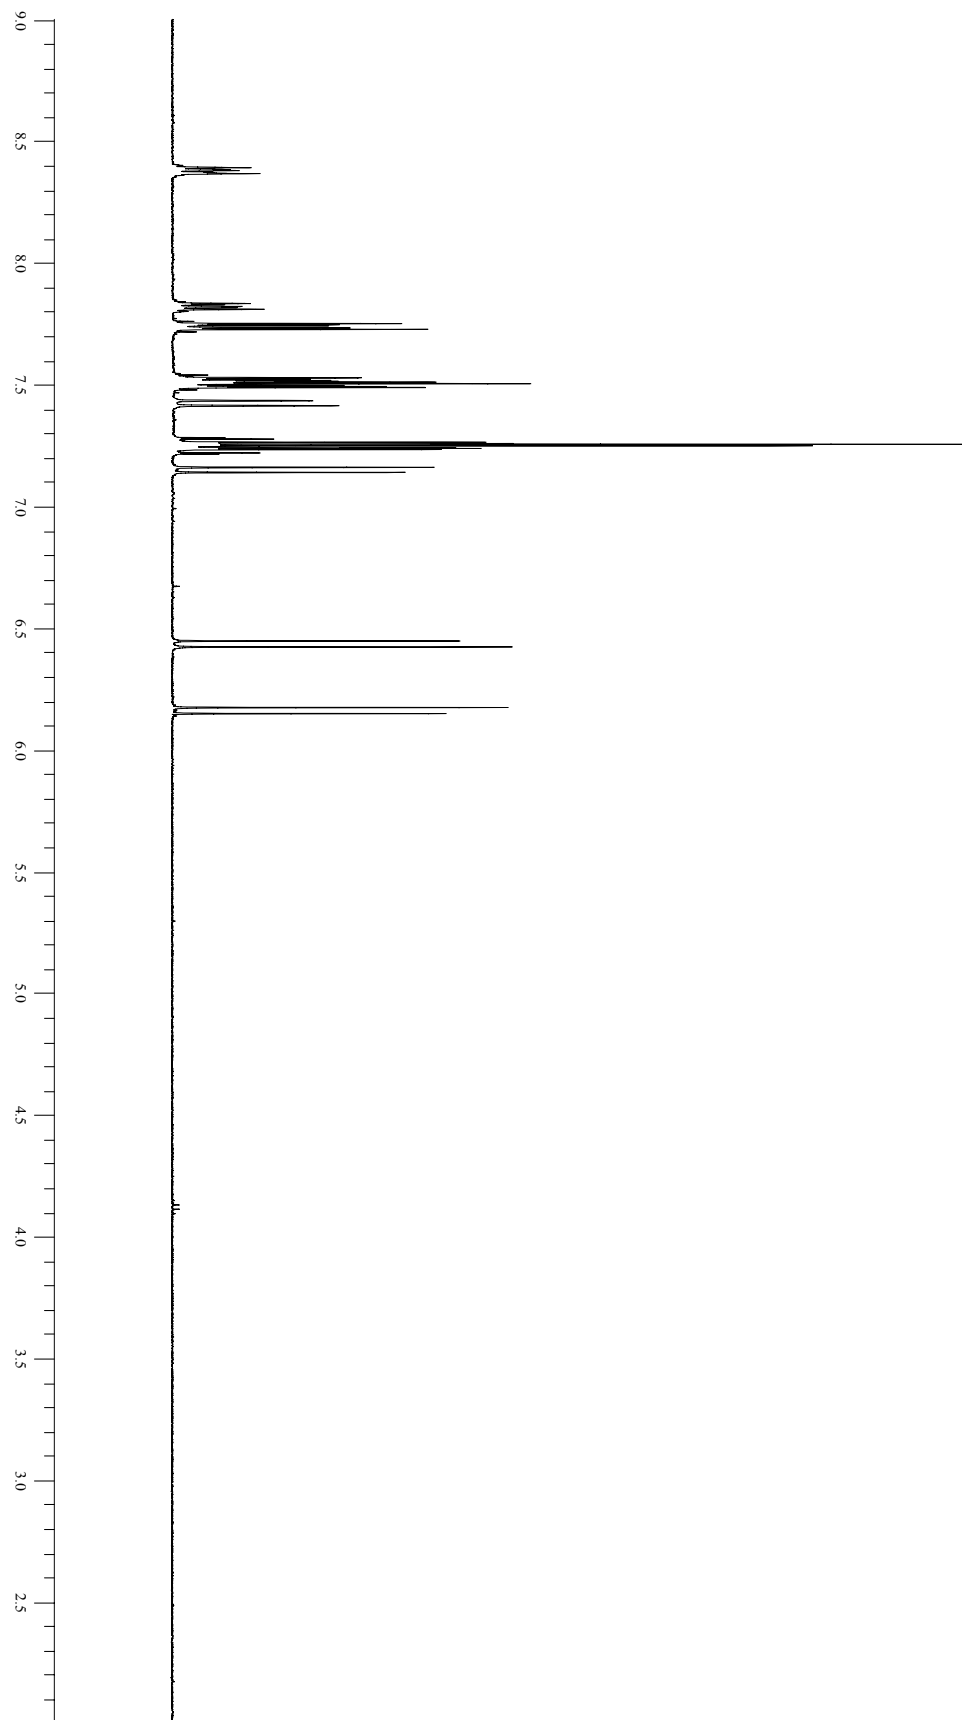

**<sup>1</sup>H NMR of 2b**



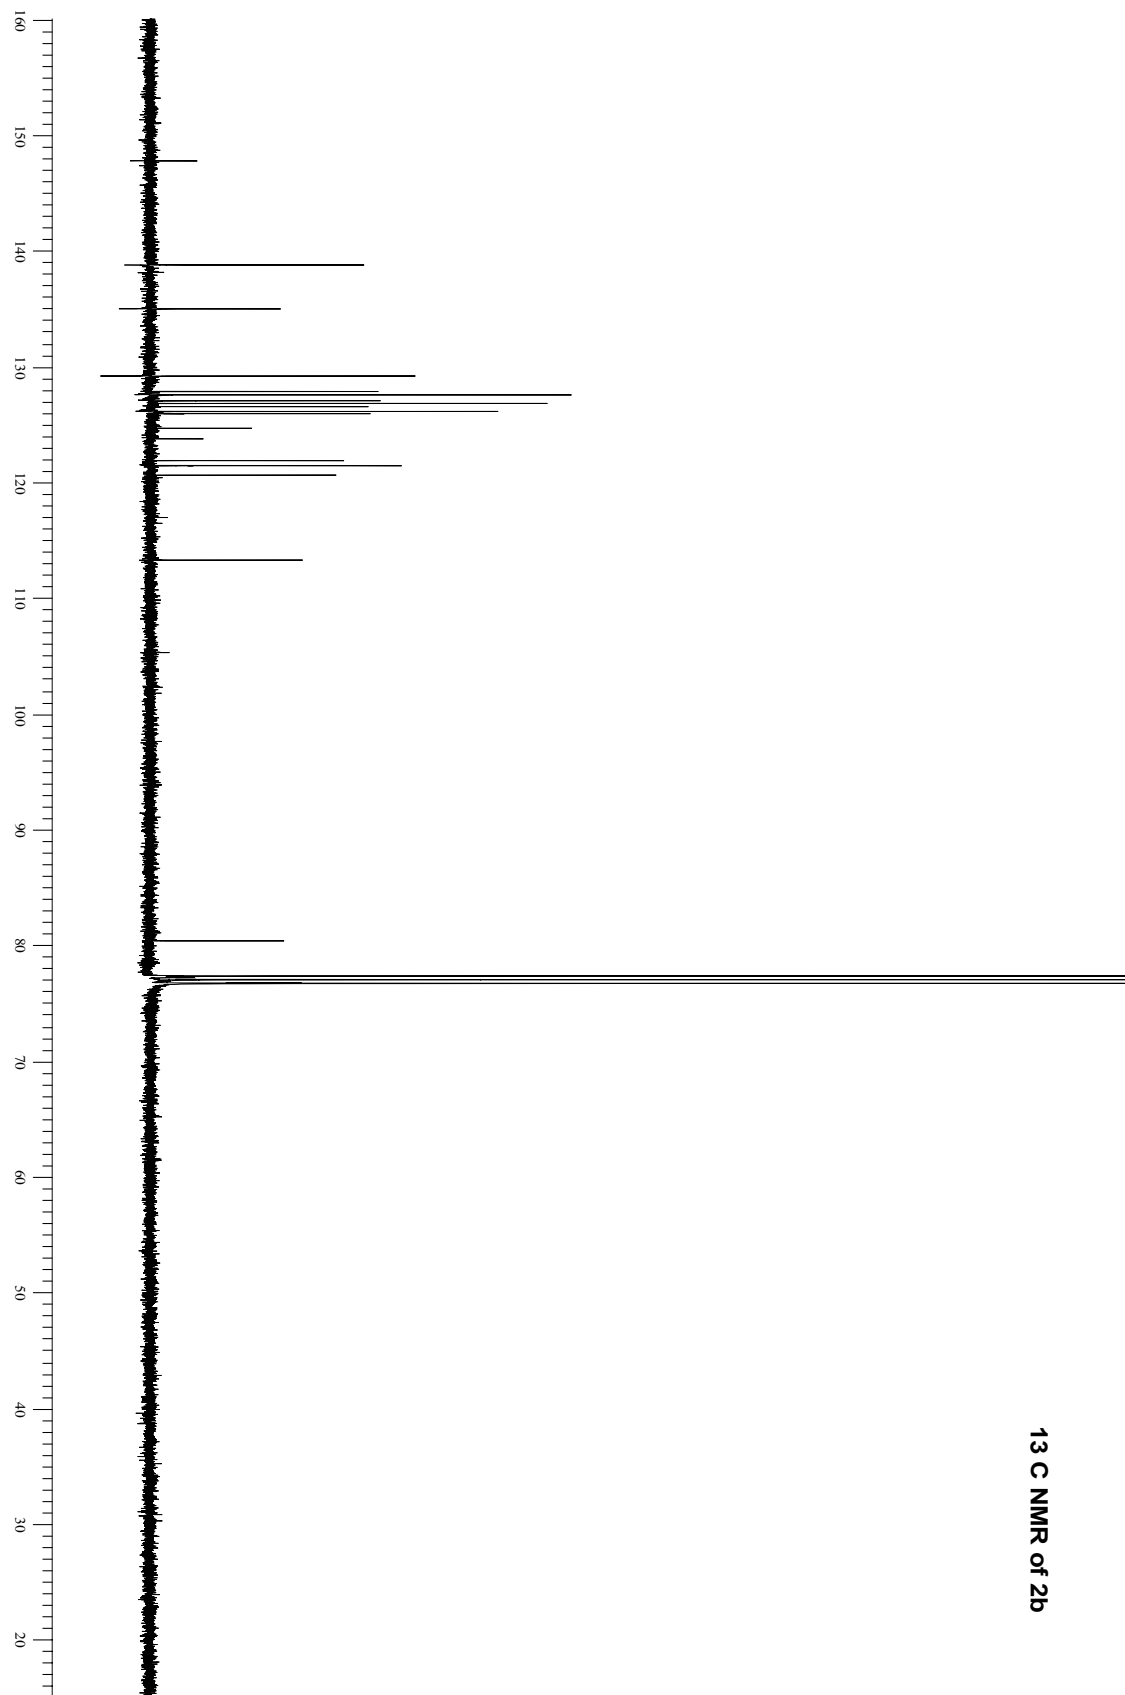

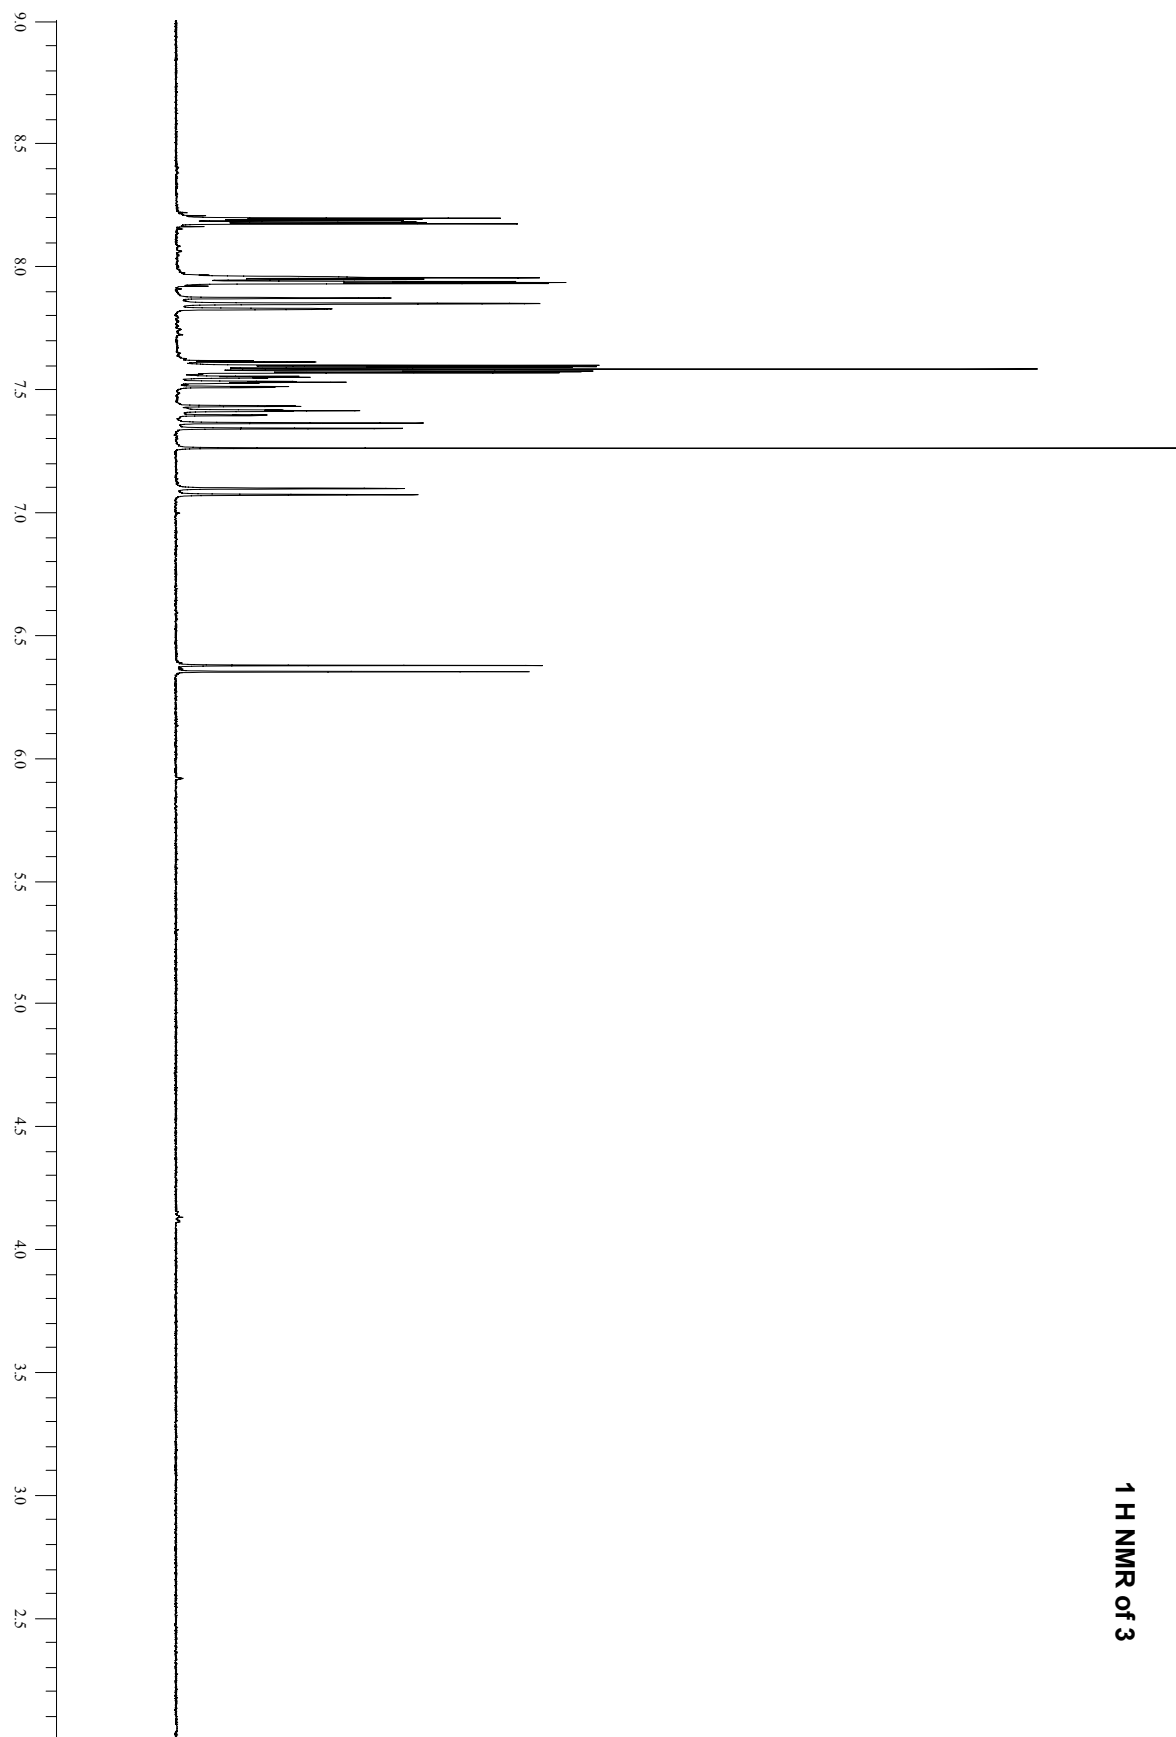

**<sup>1</sup>H NMR of 3**

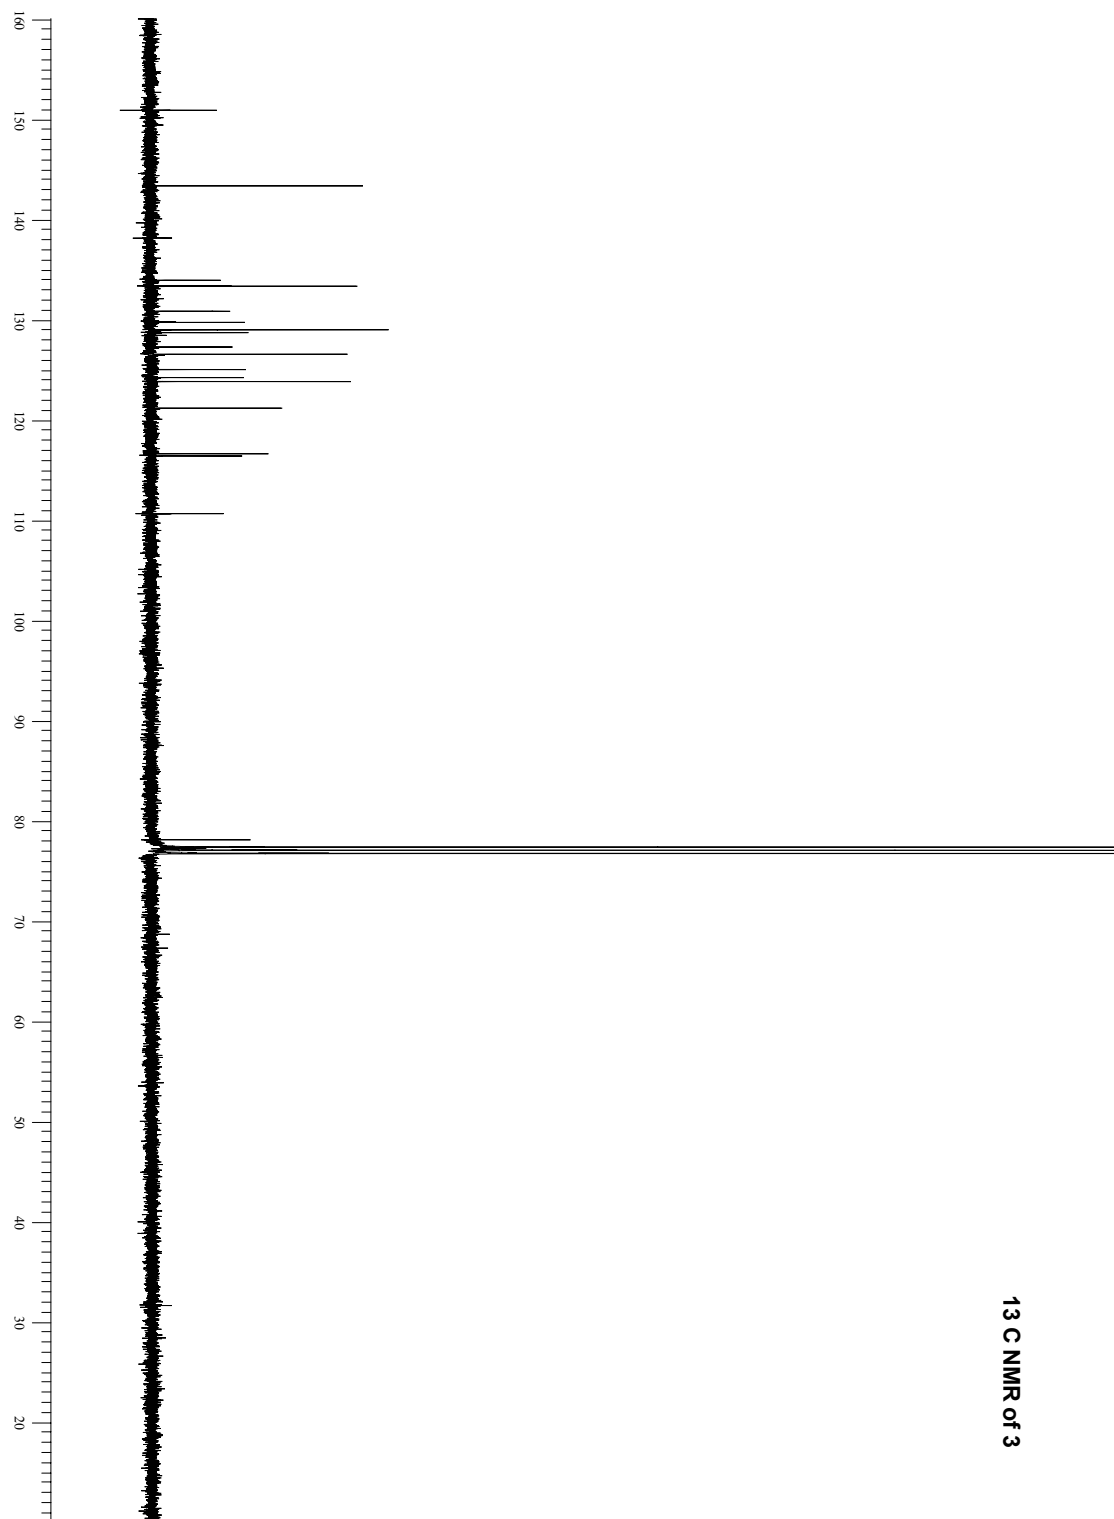

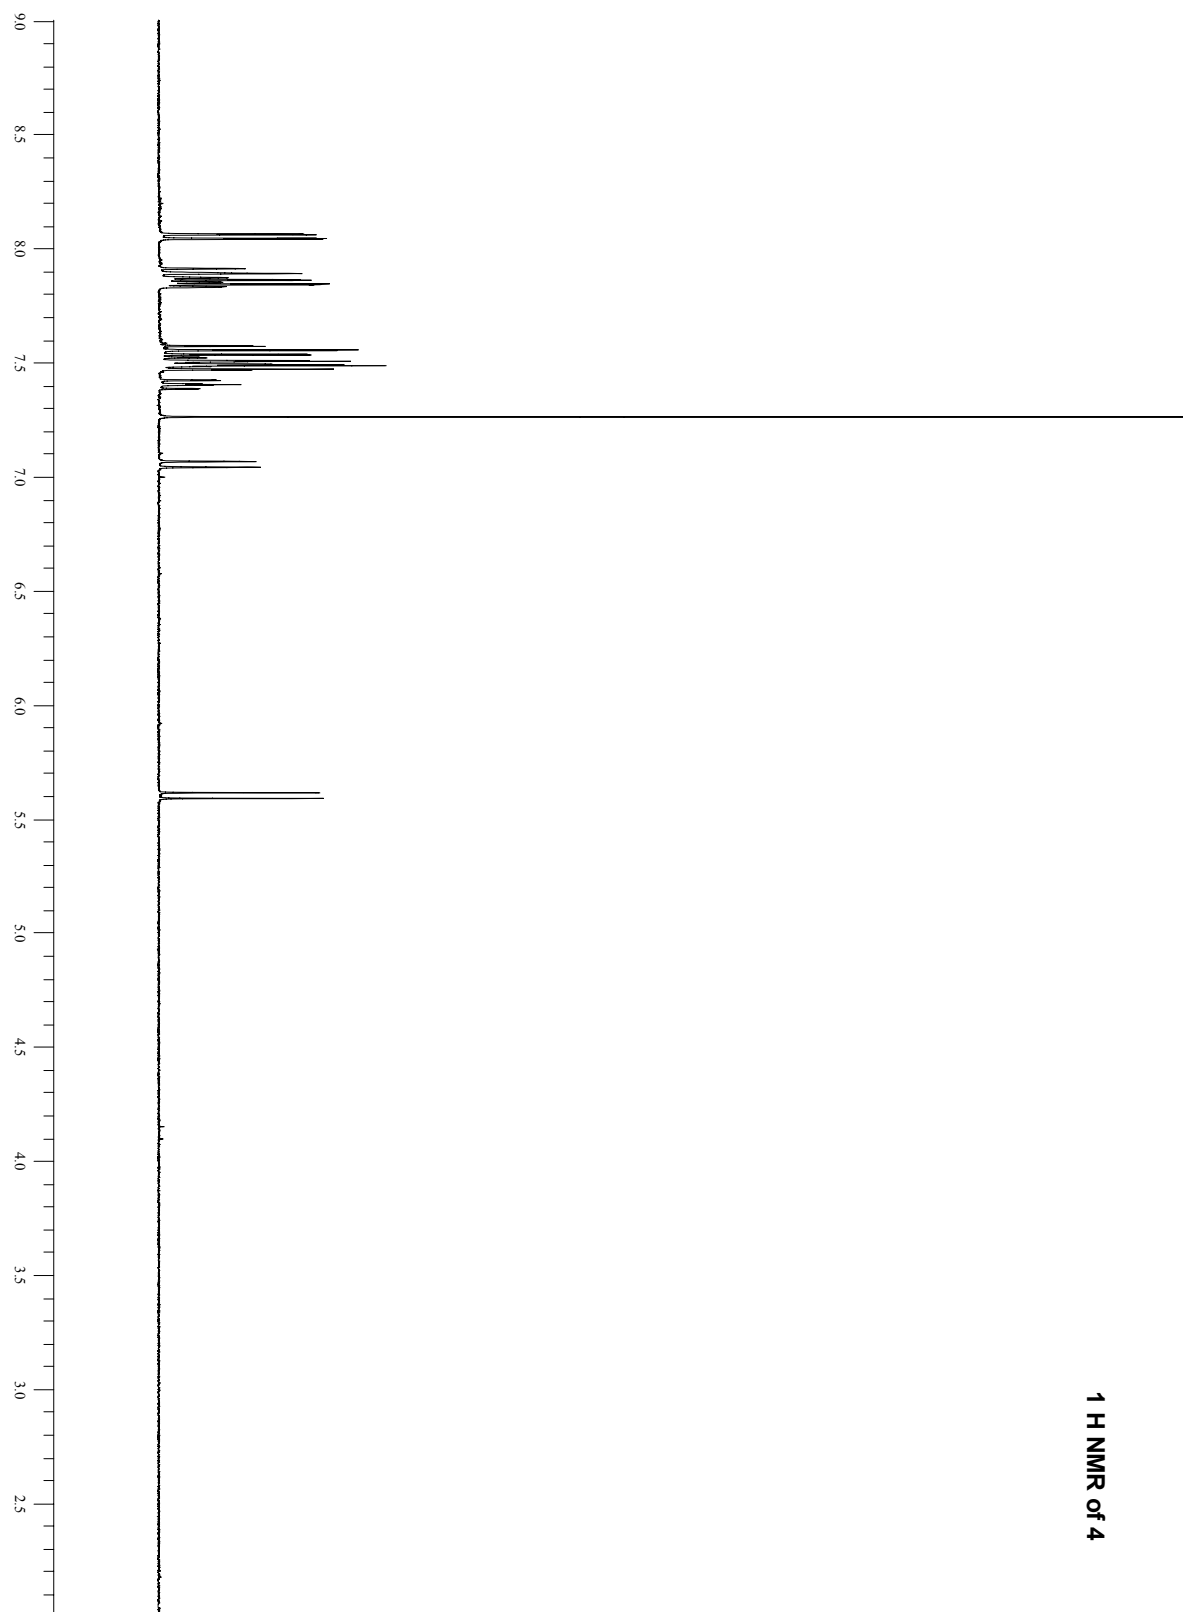

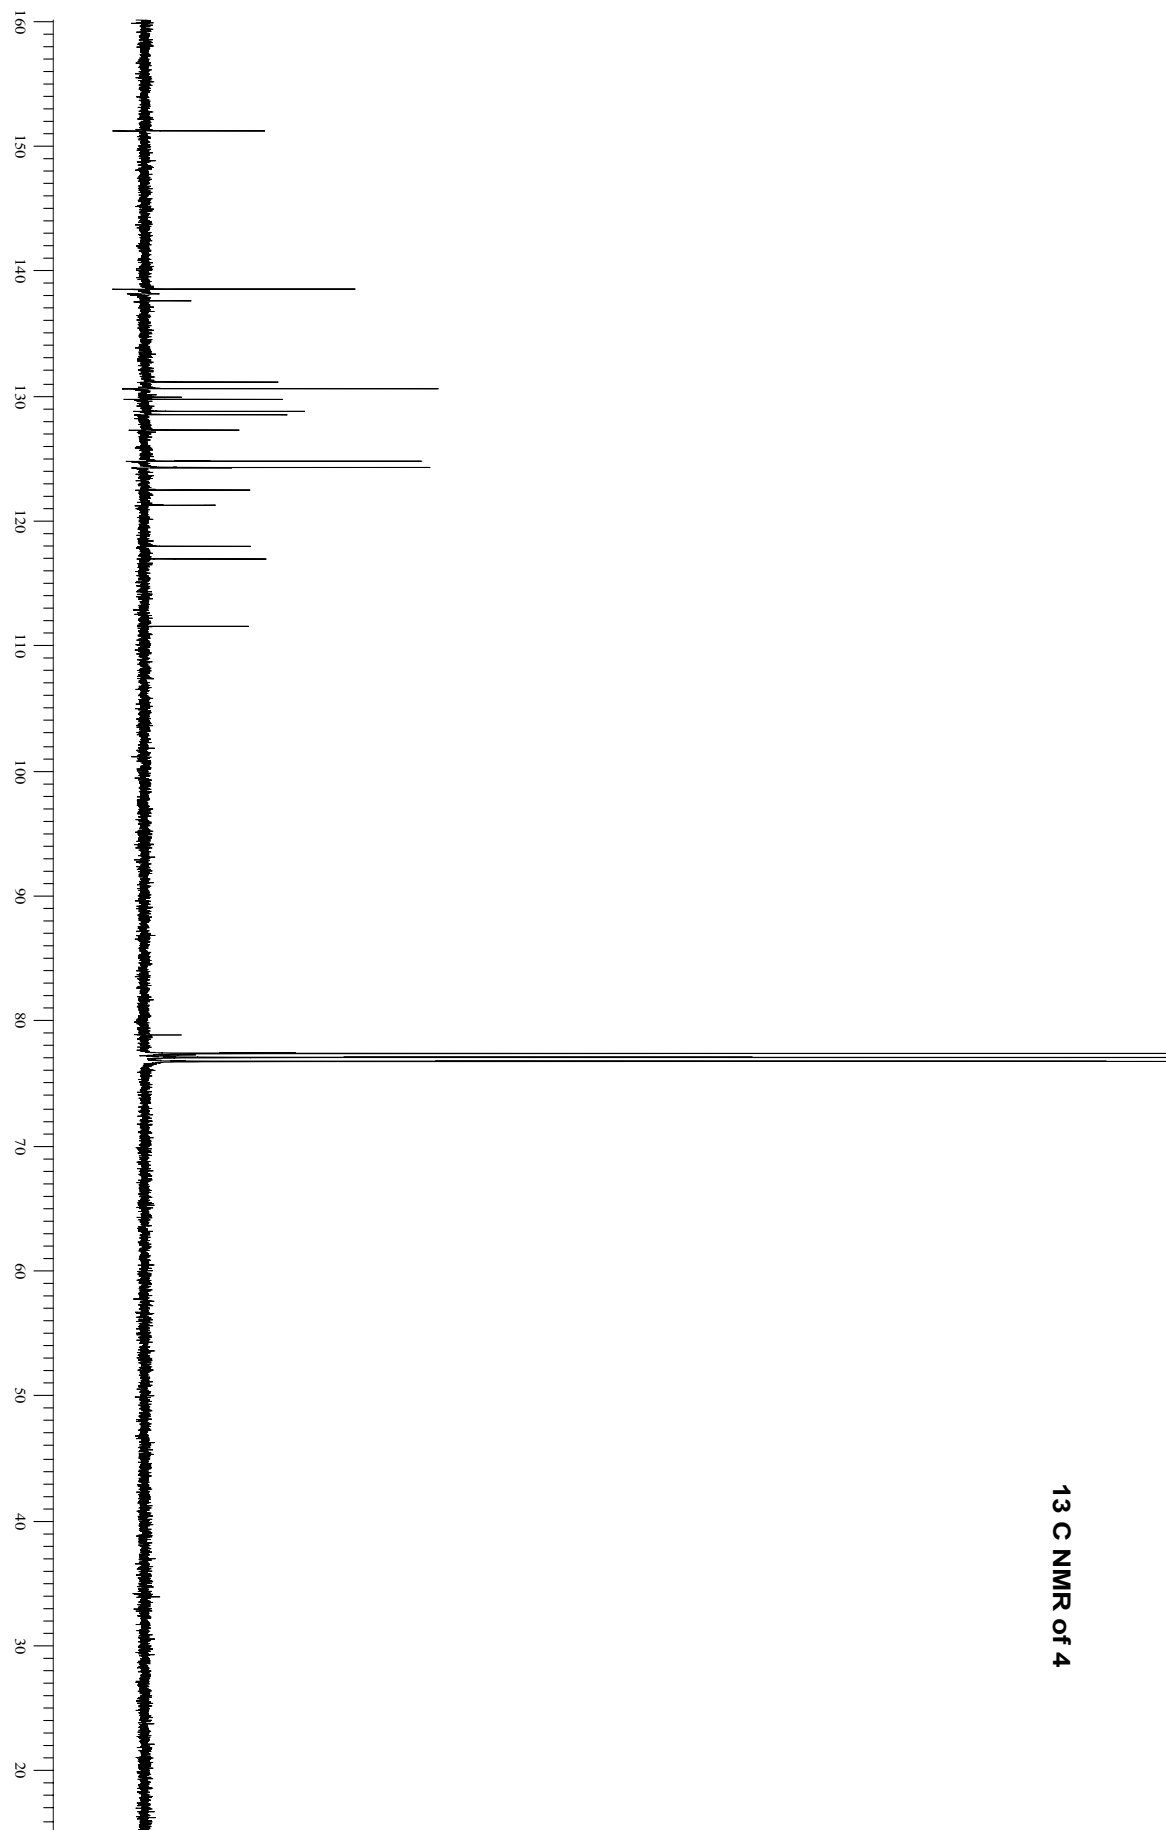

**<sup>13</sup>C NMR of 4**

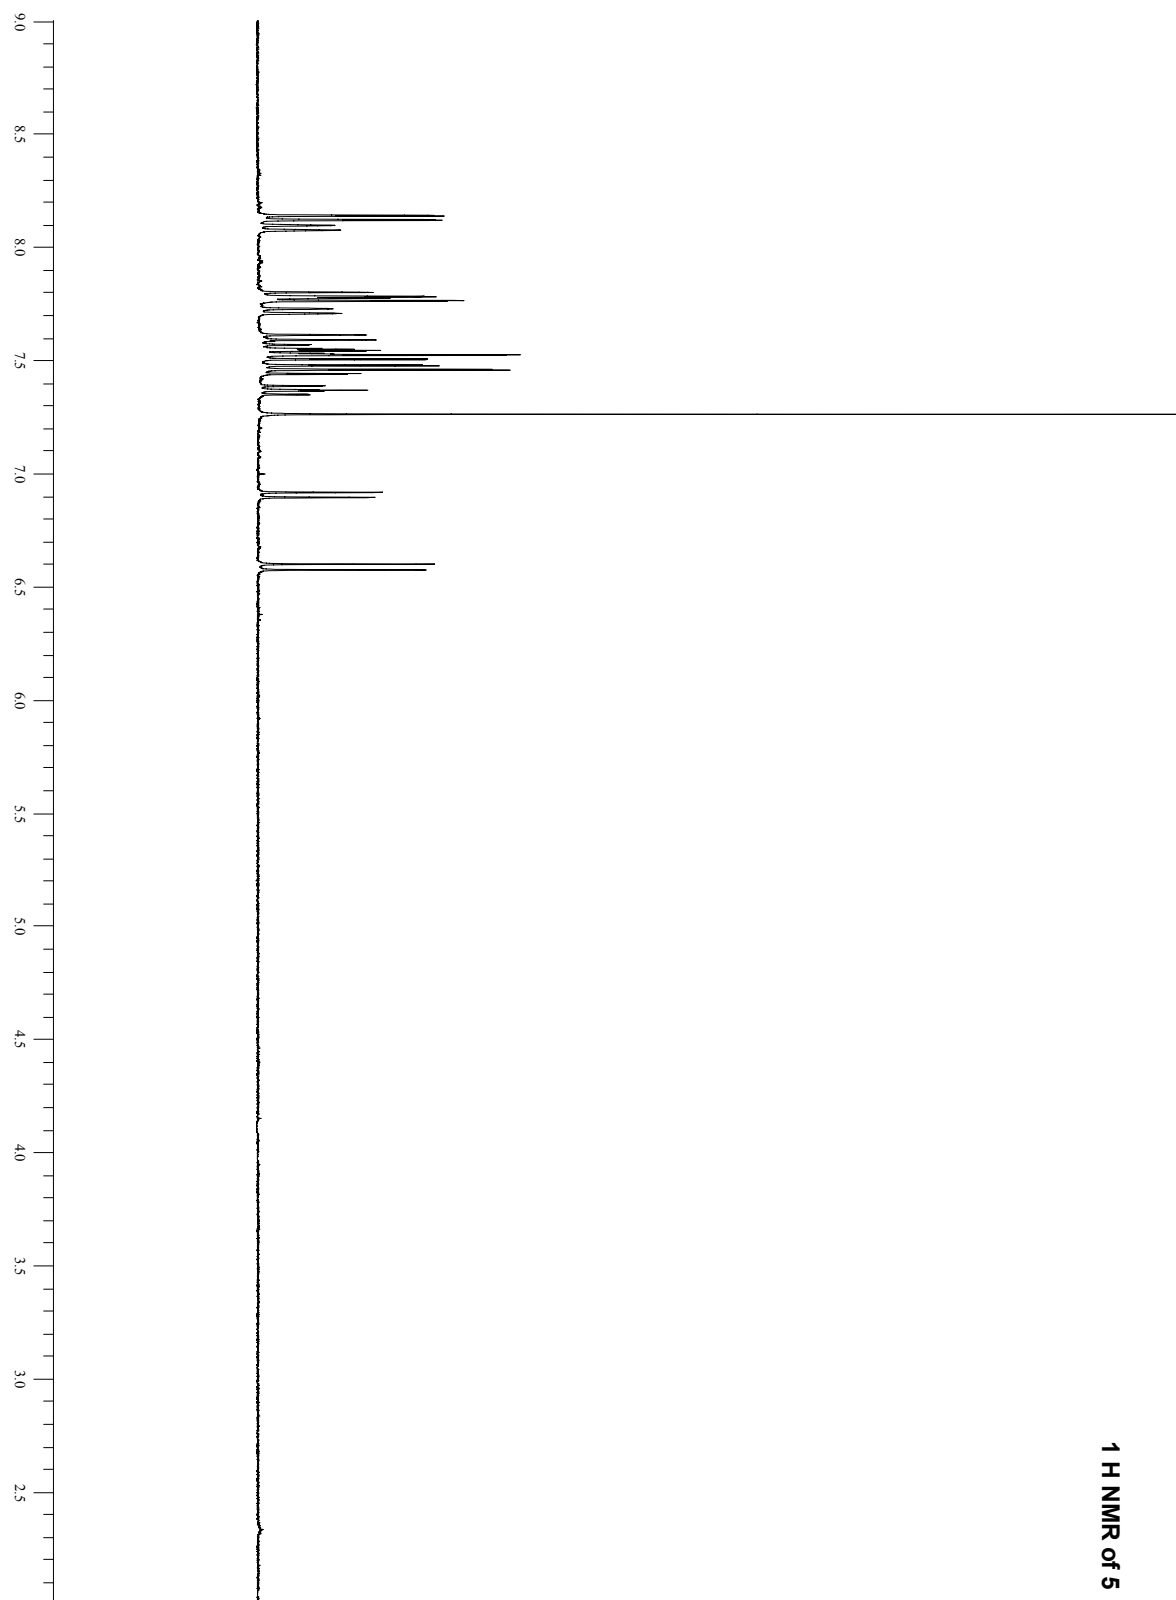

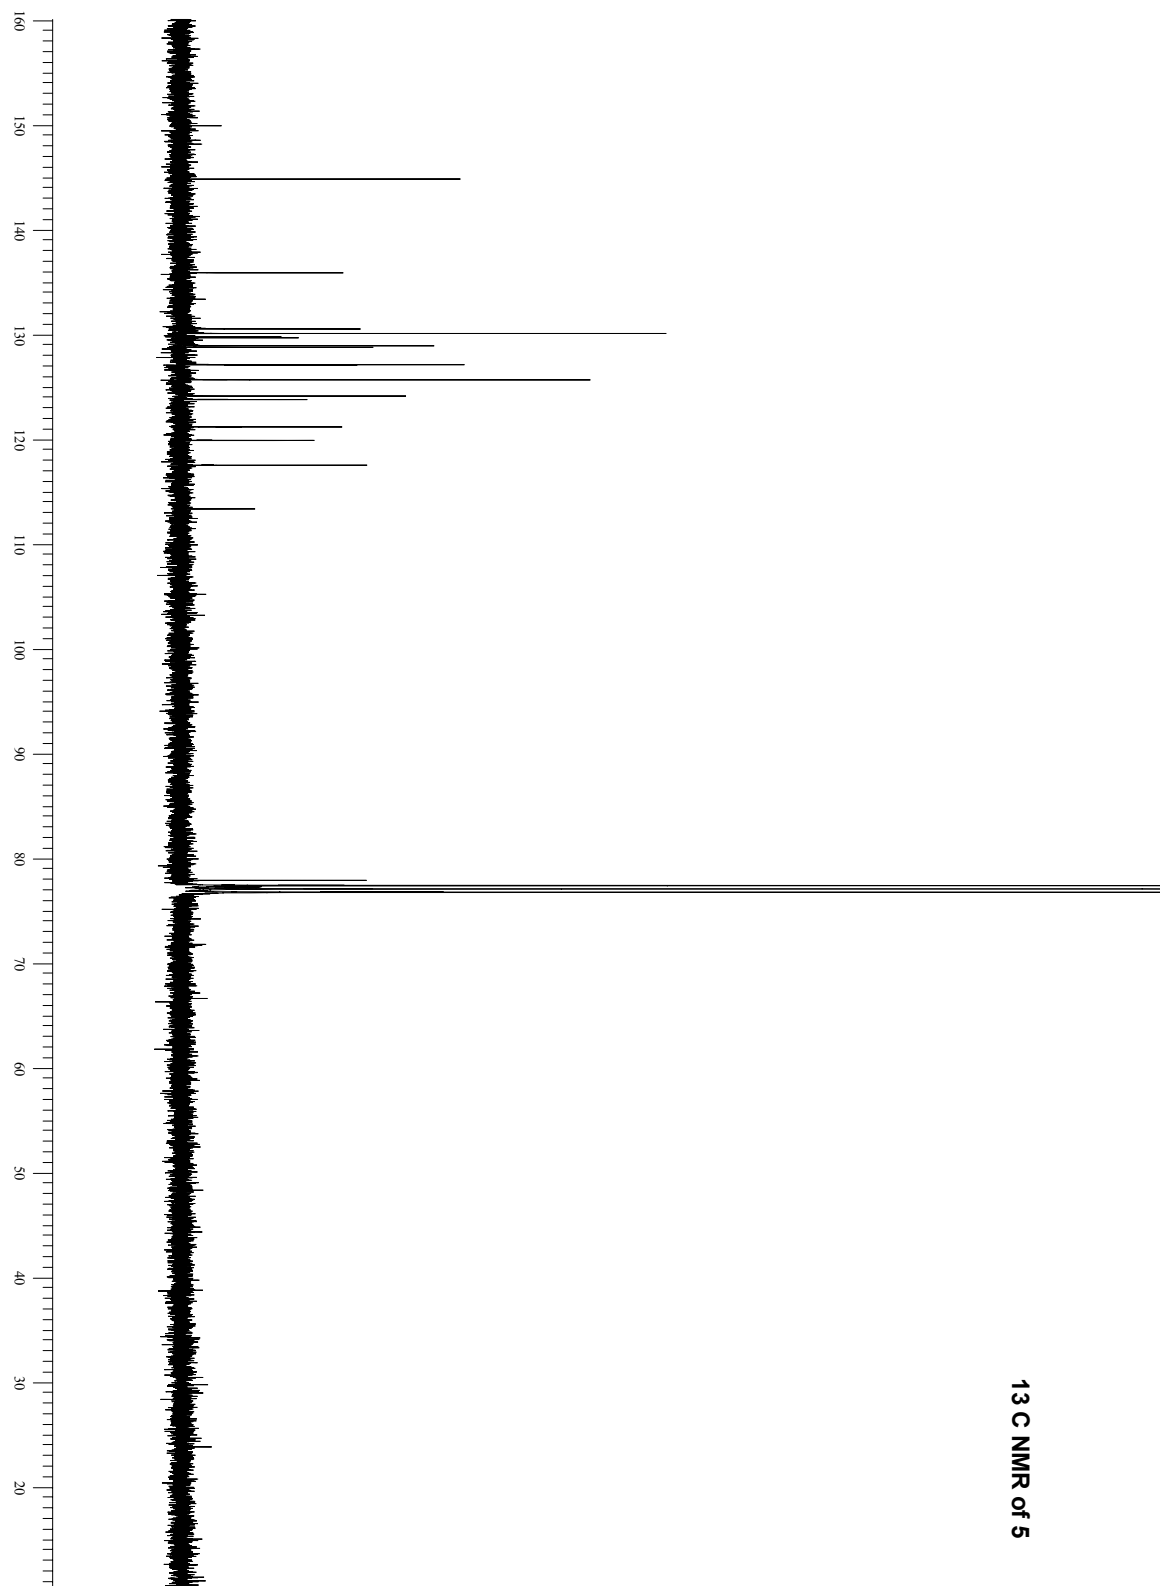

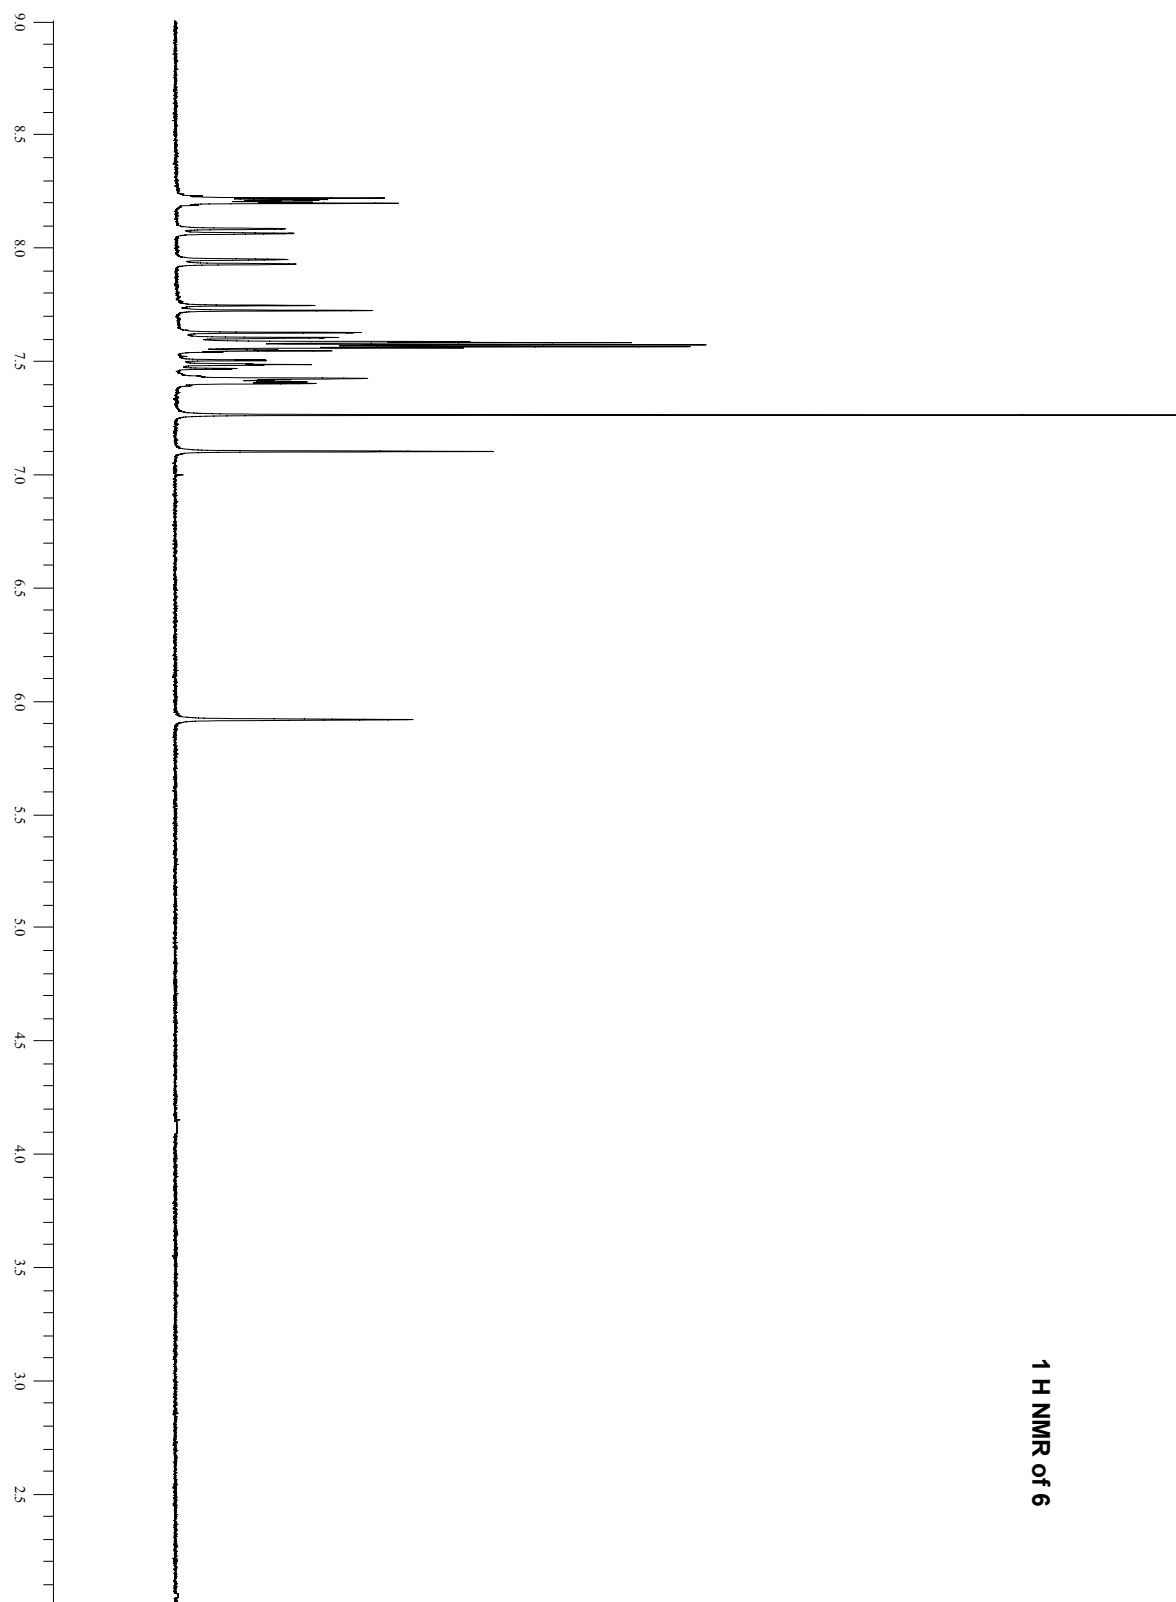



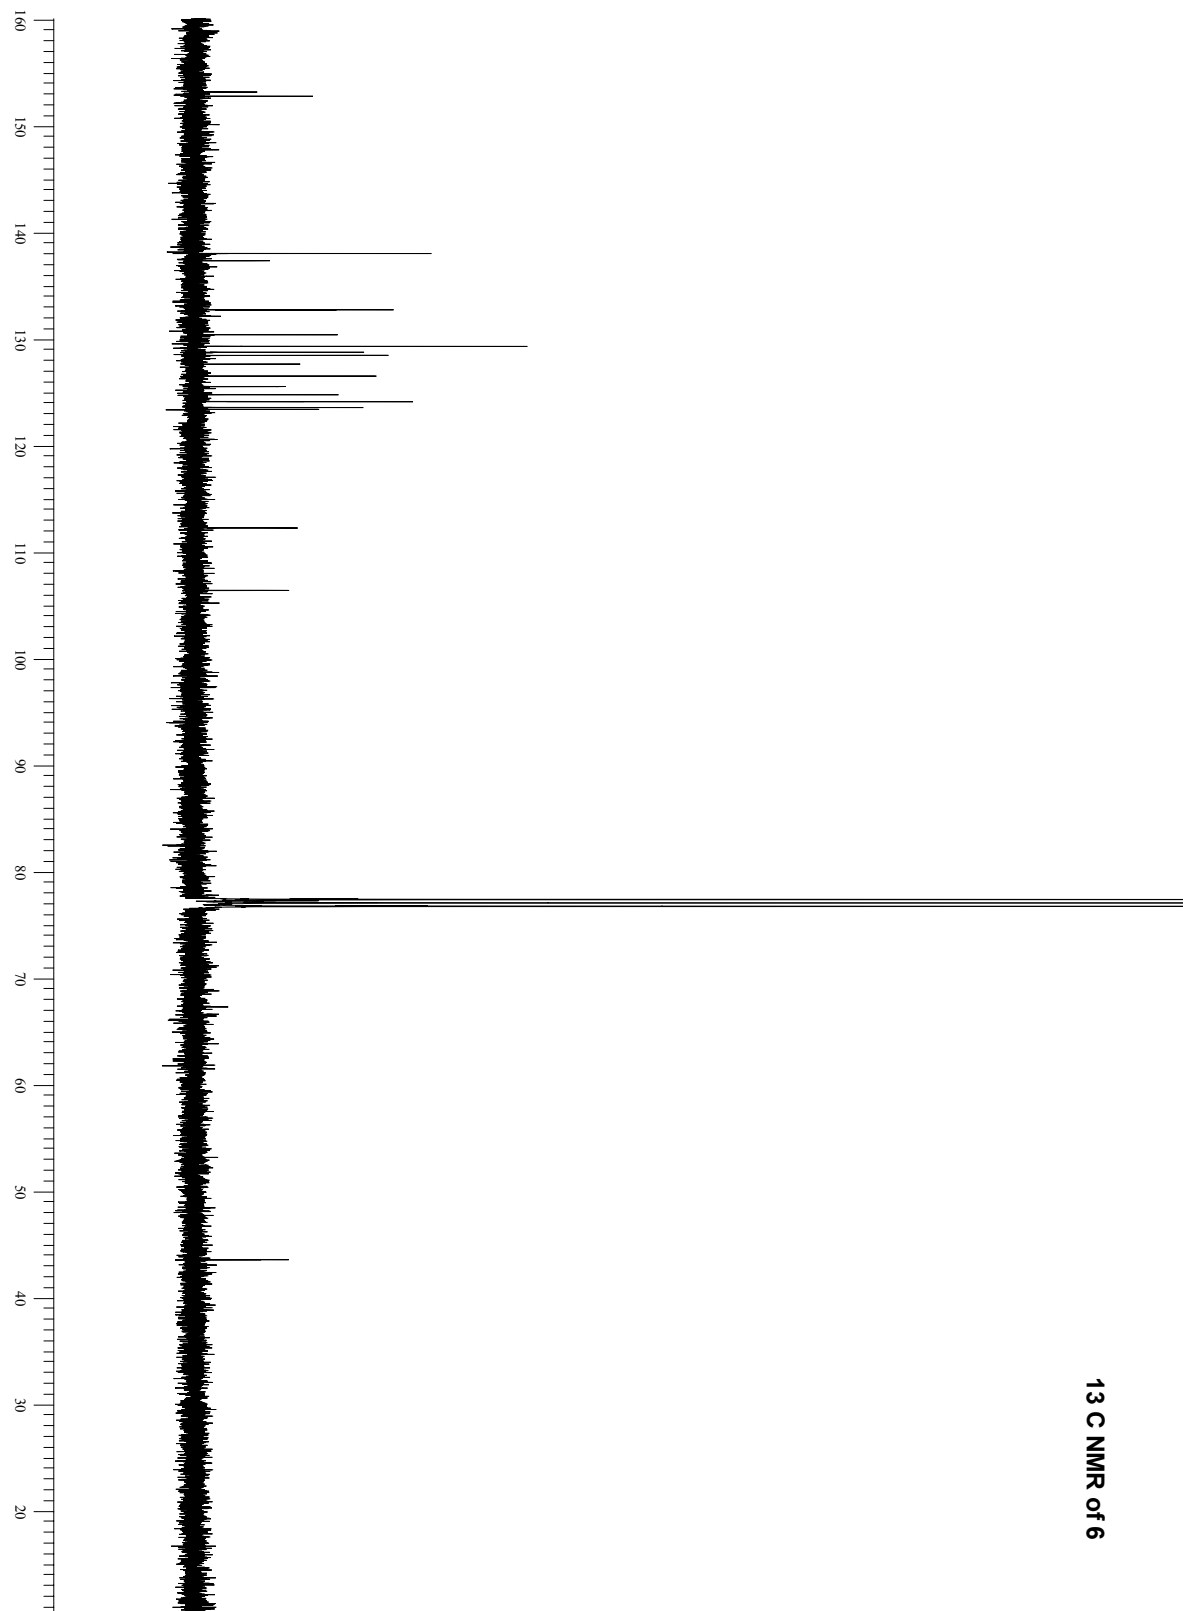

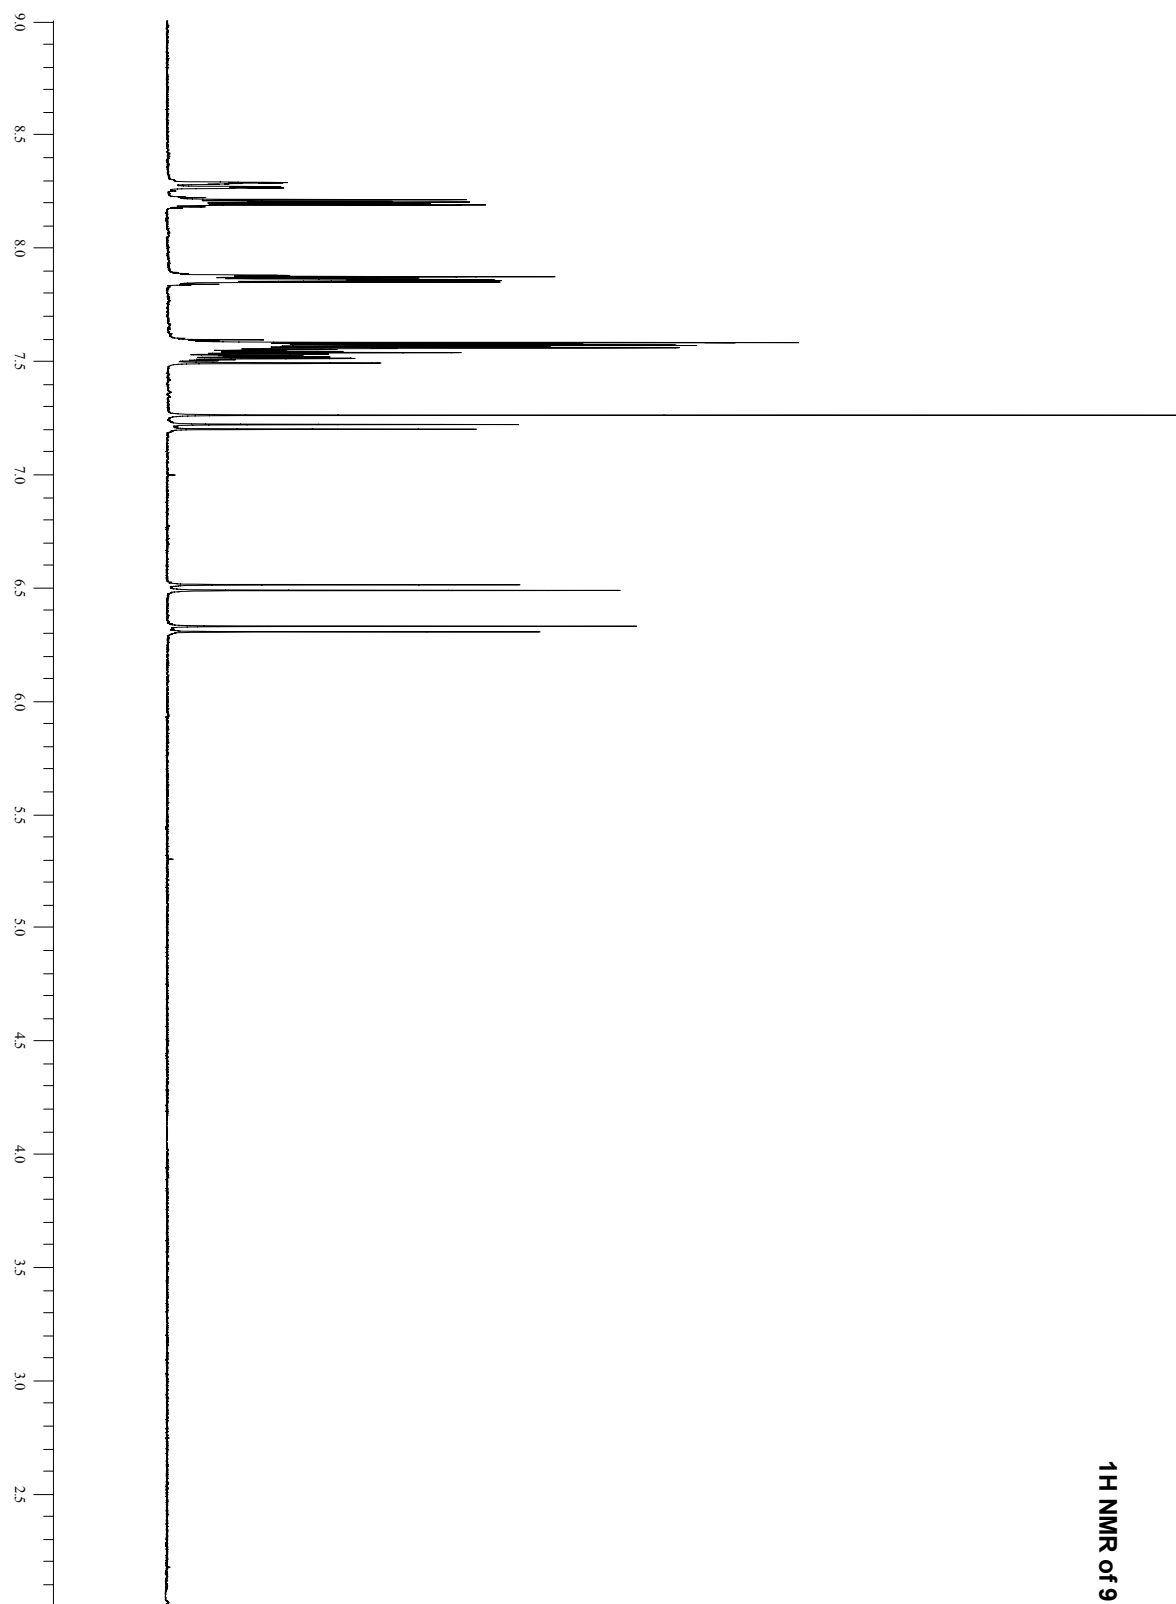

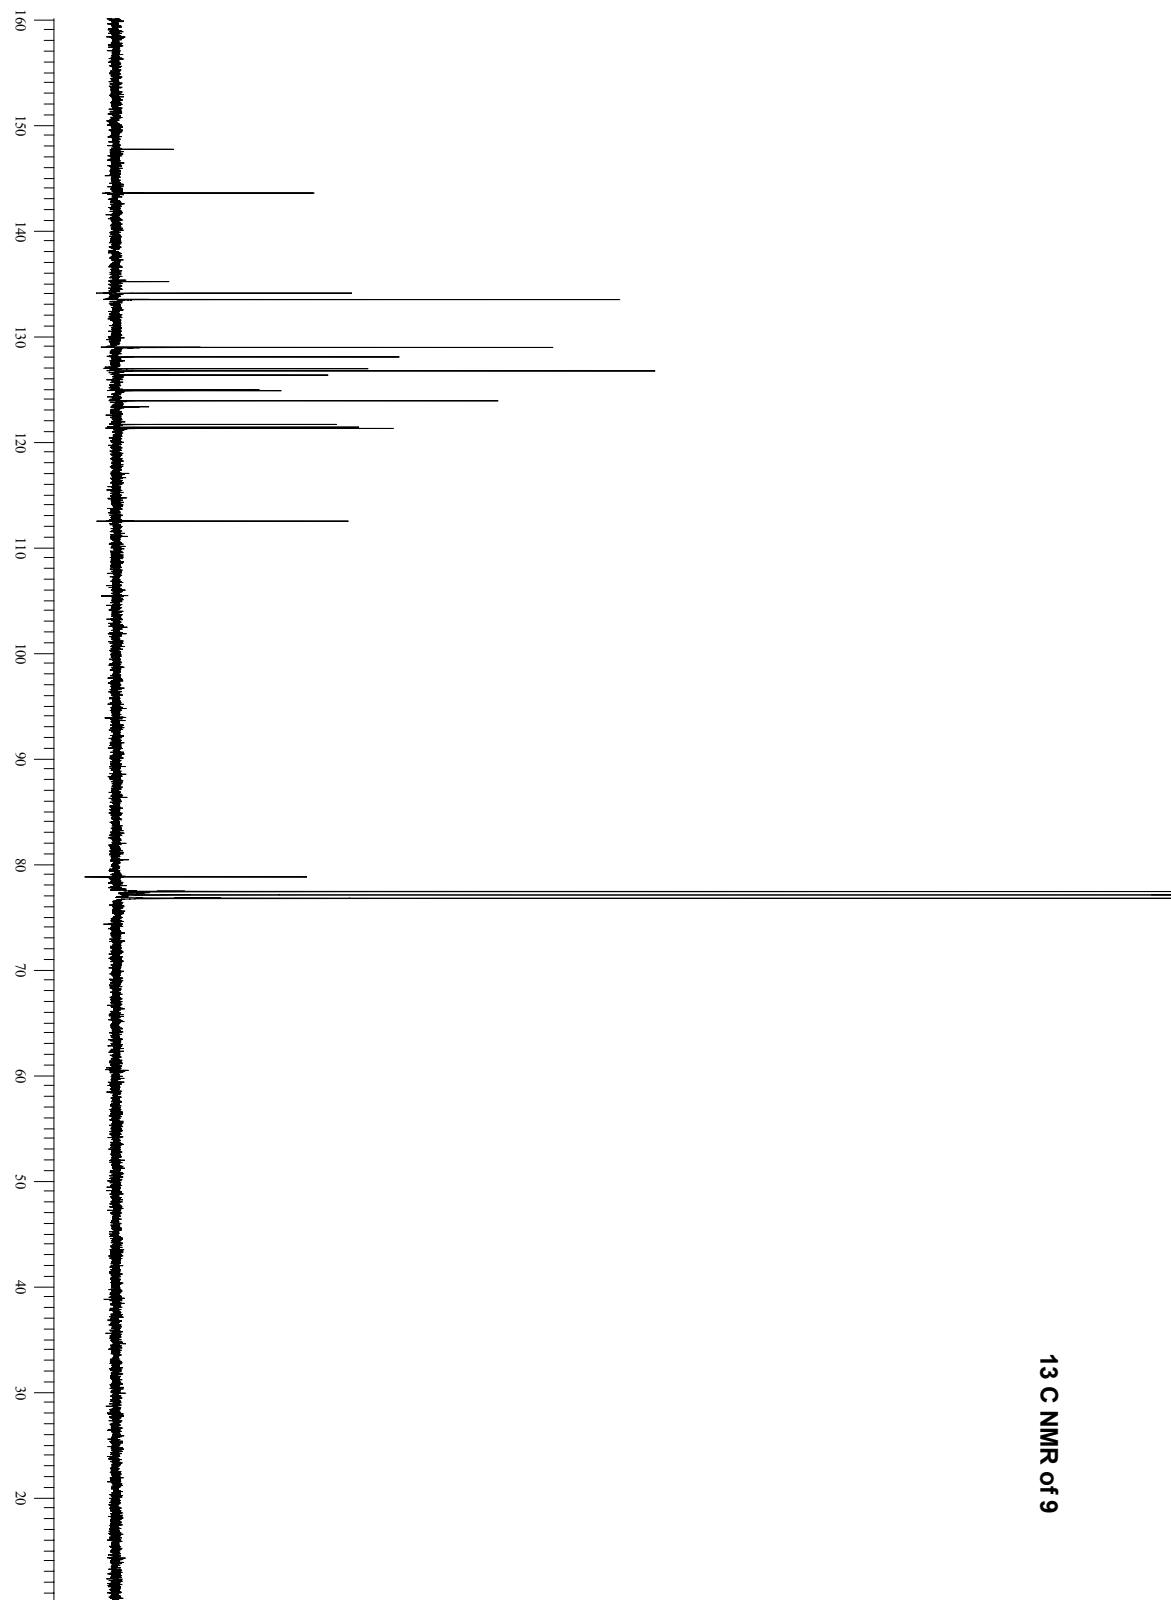

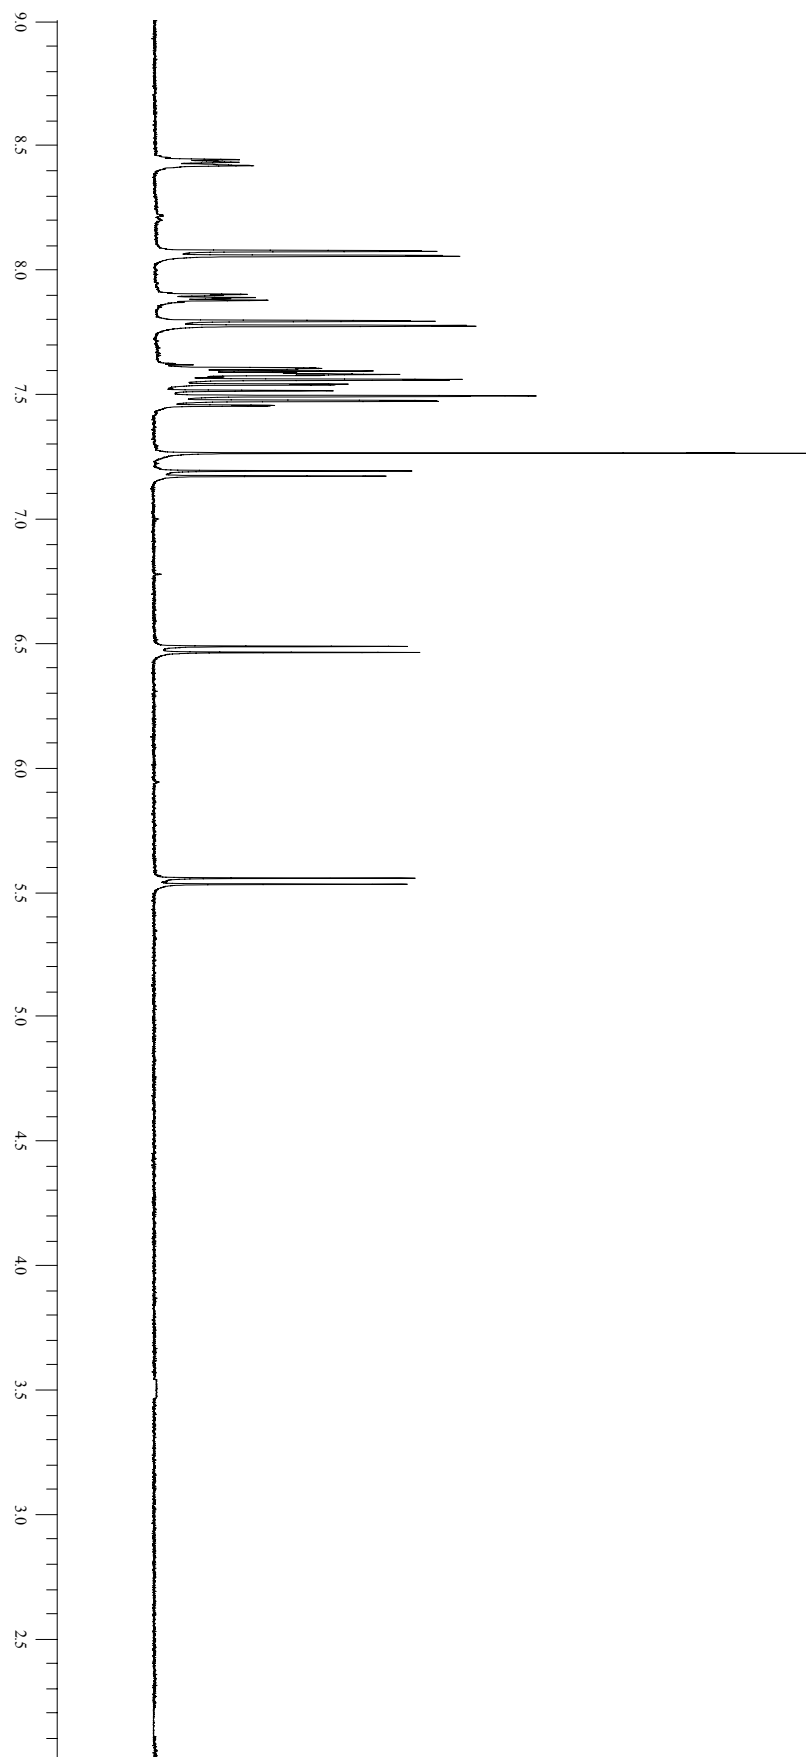

**1 H NMR of 10**

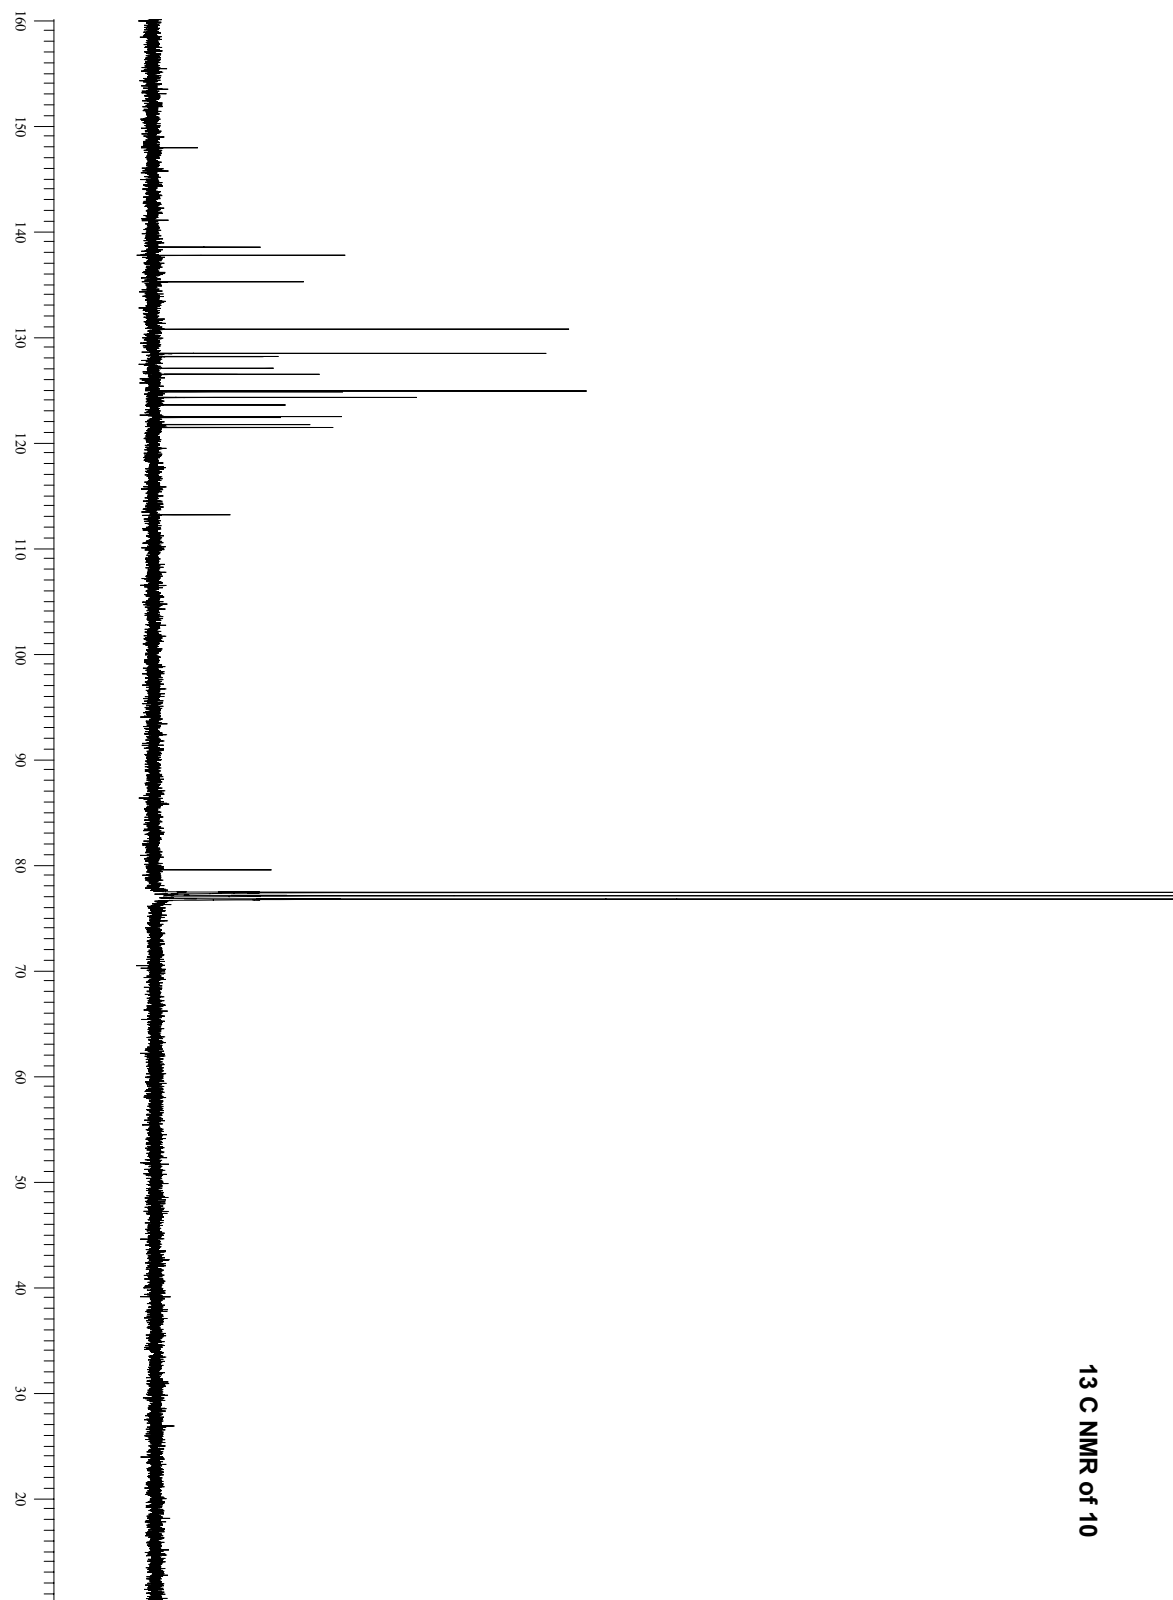

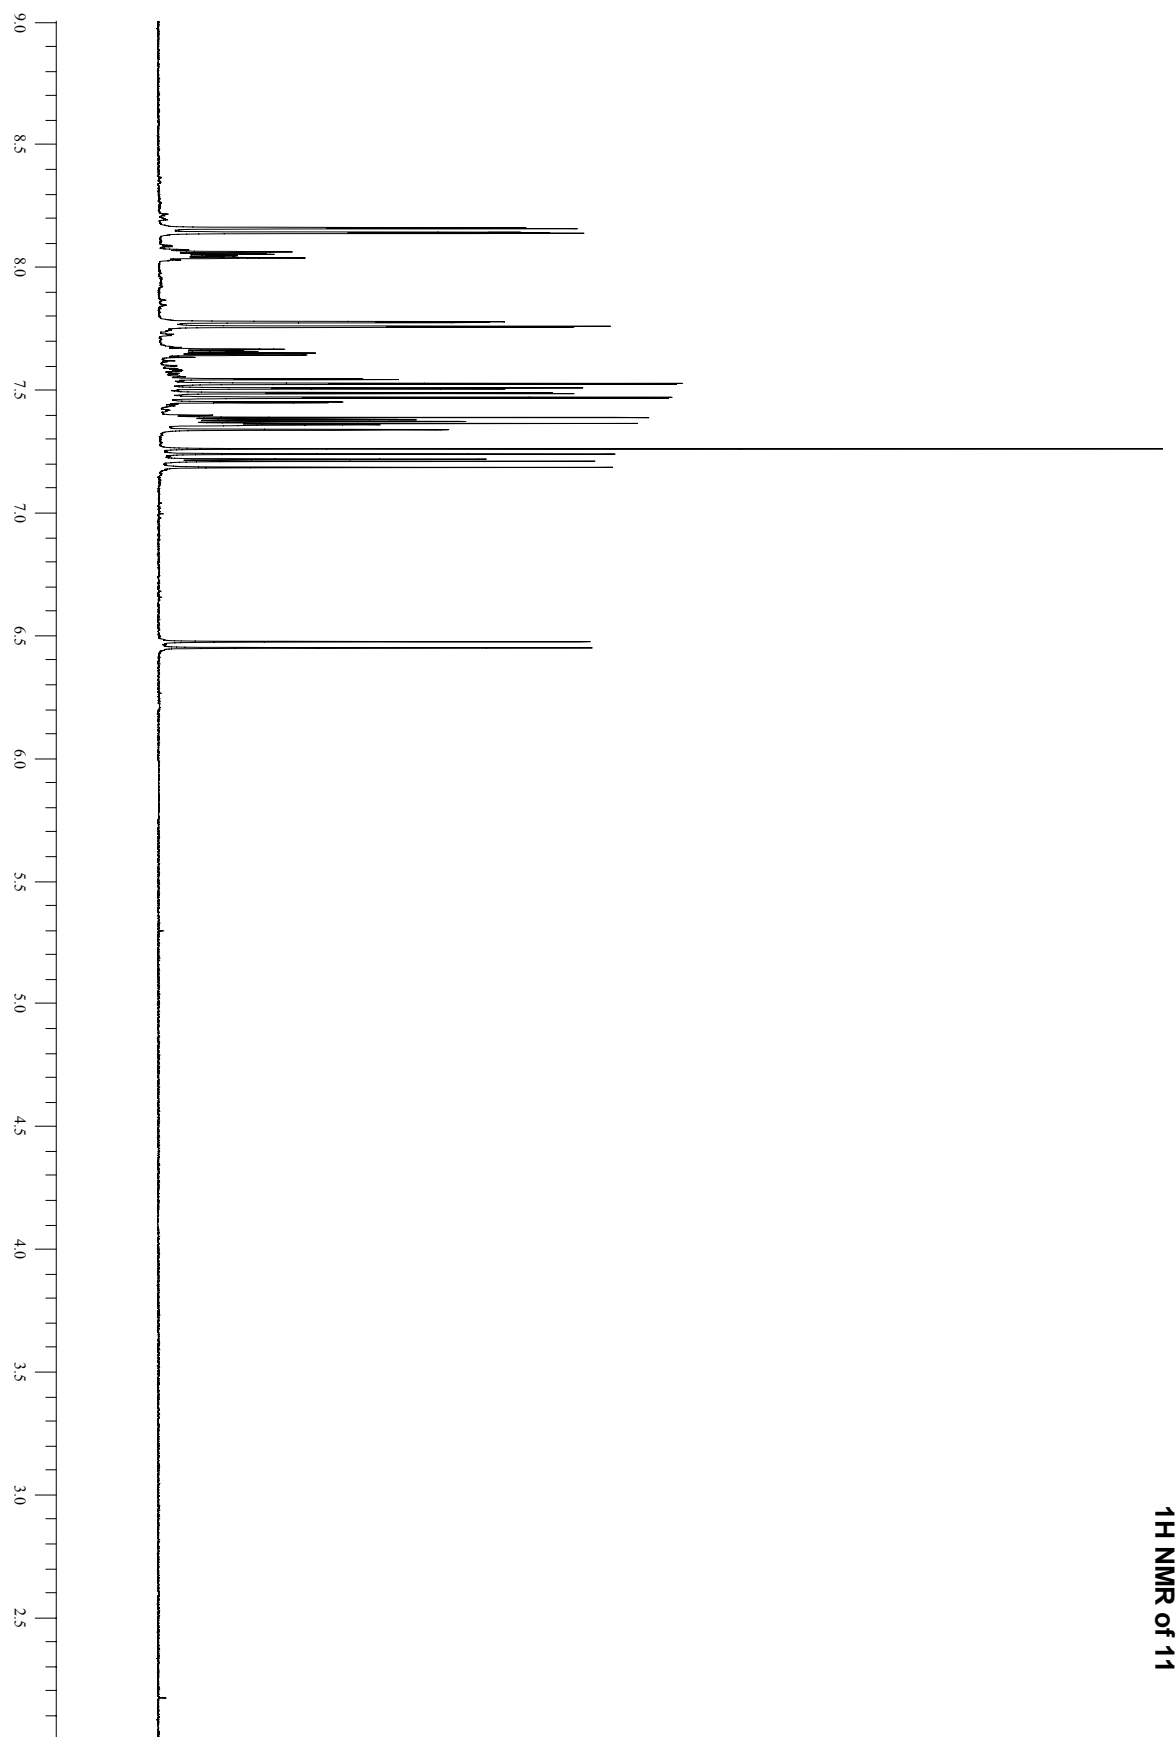

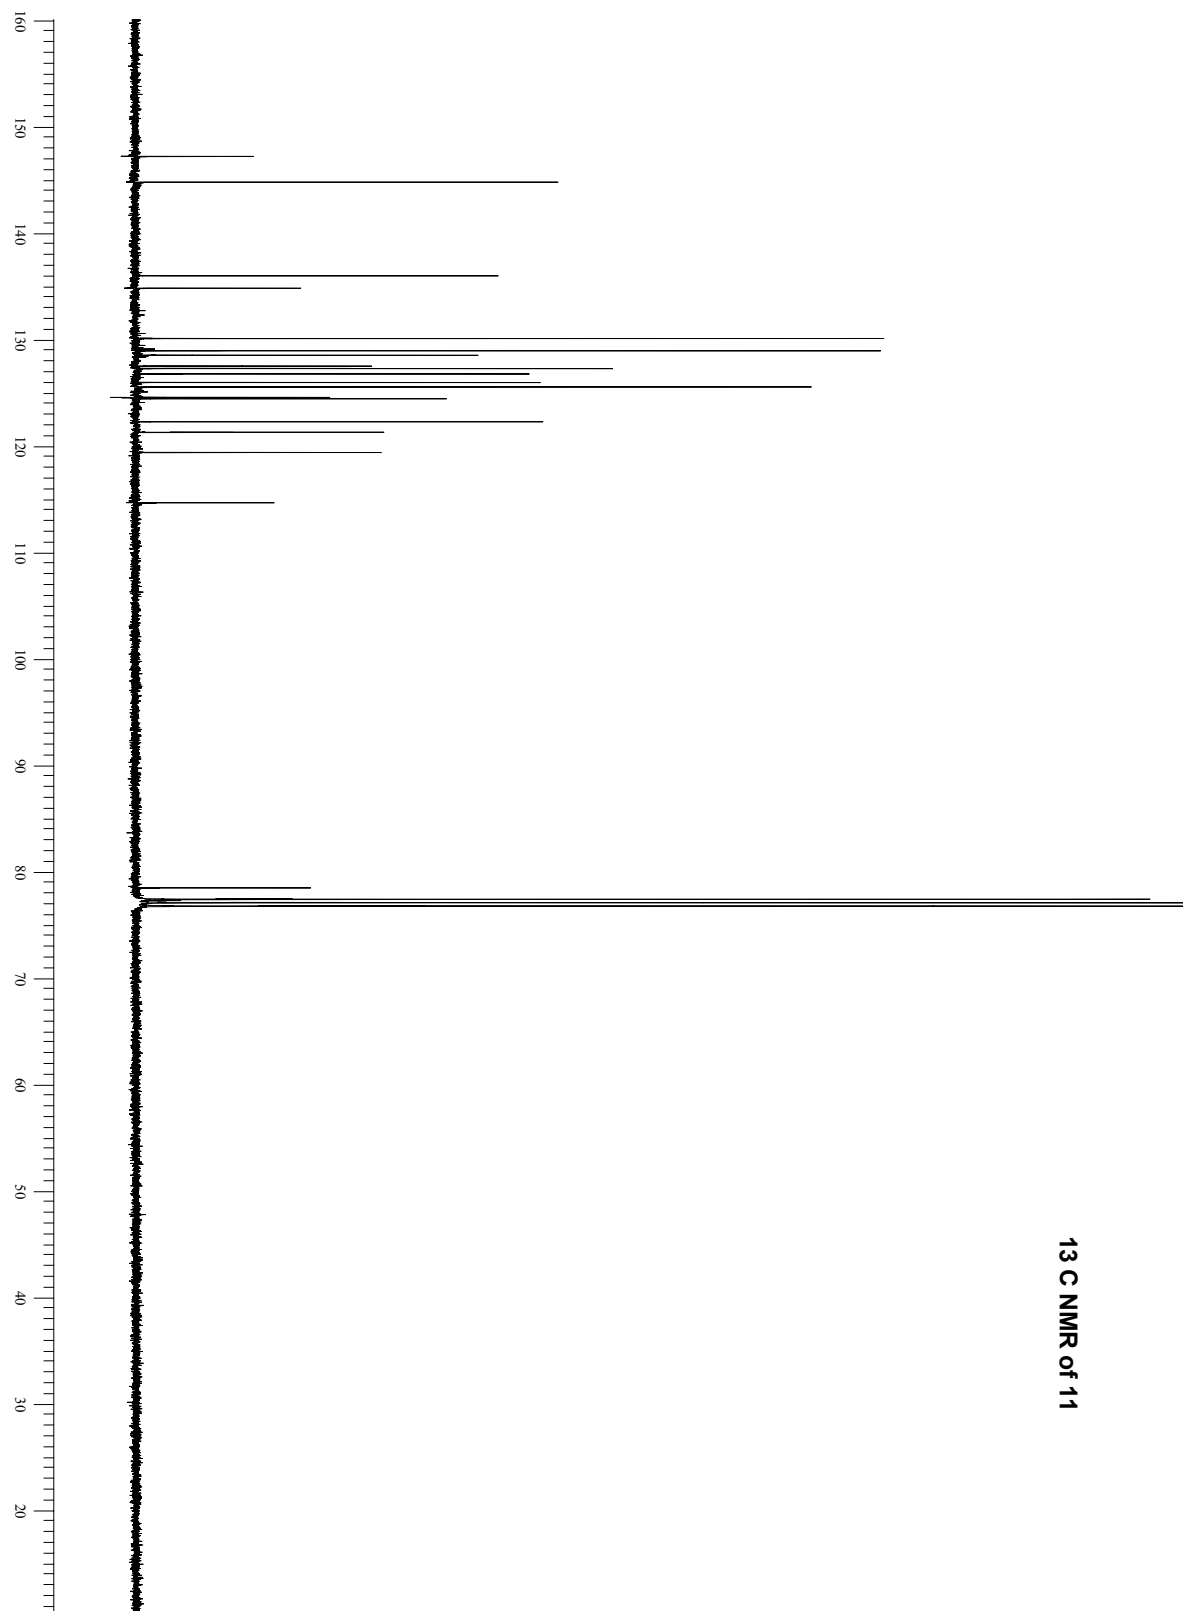

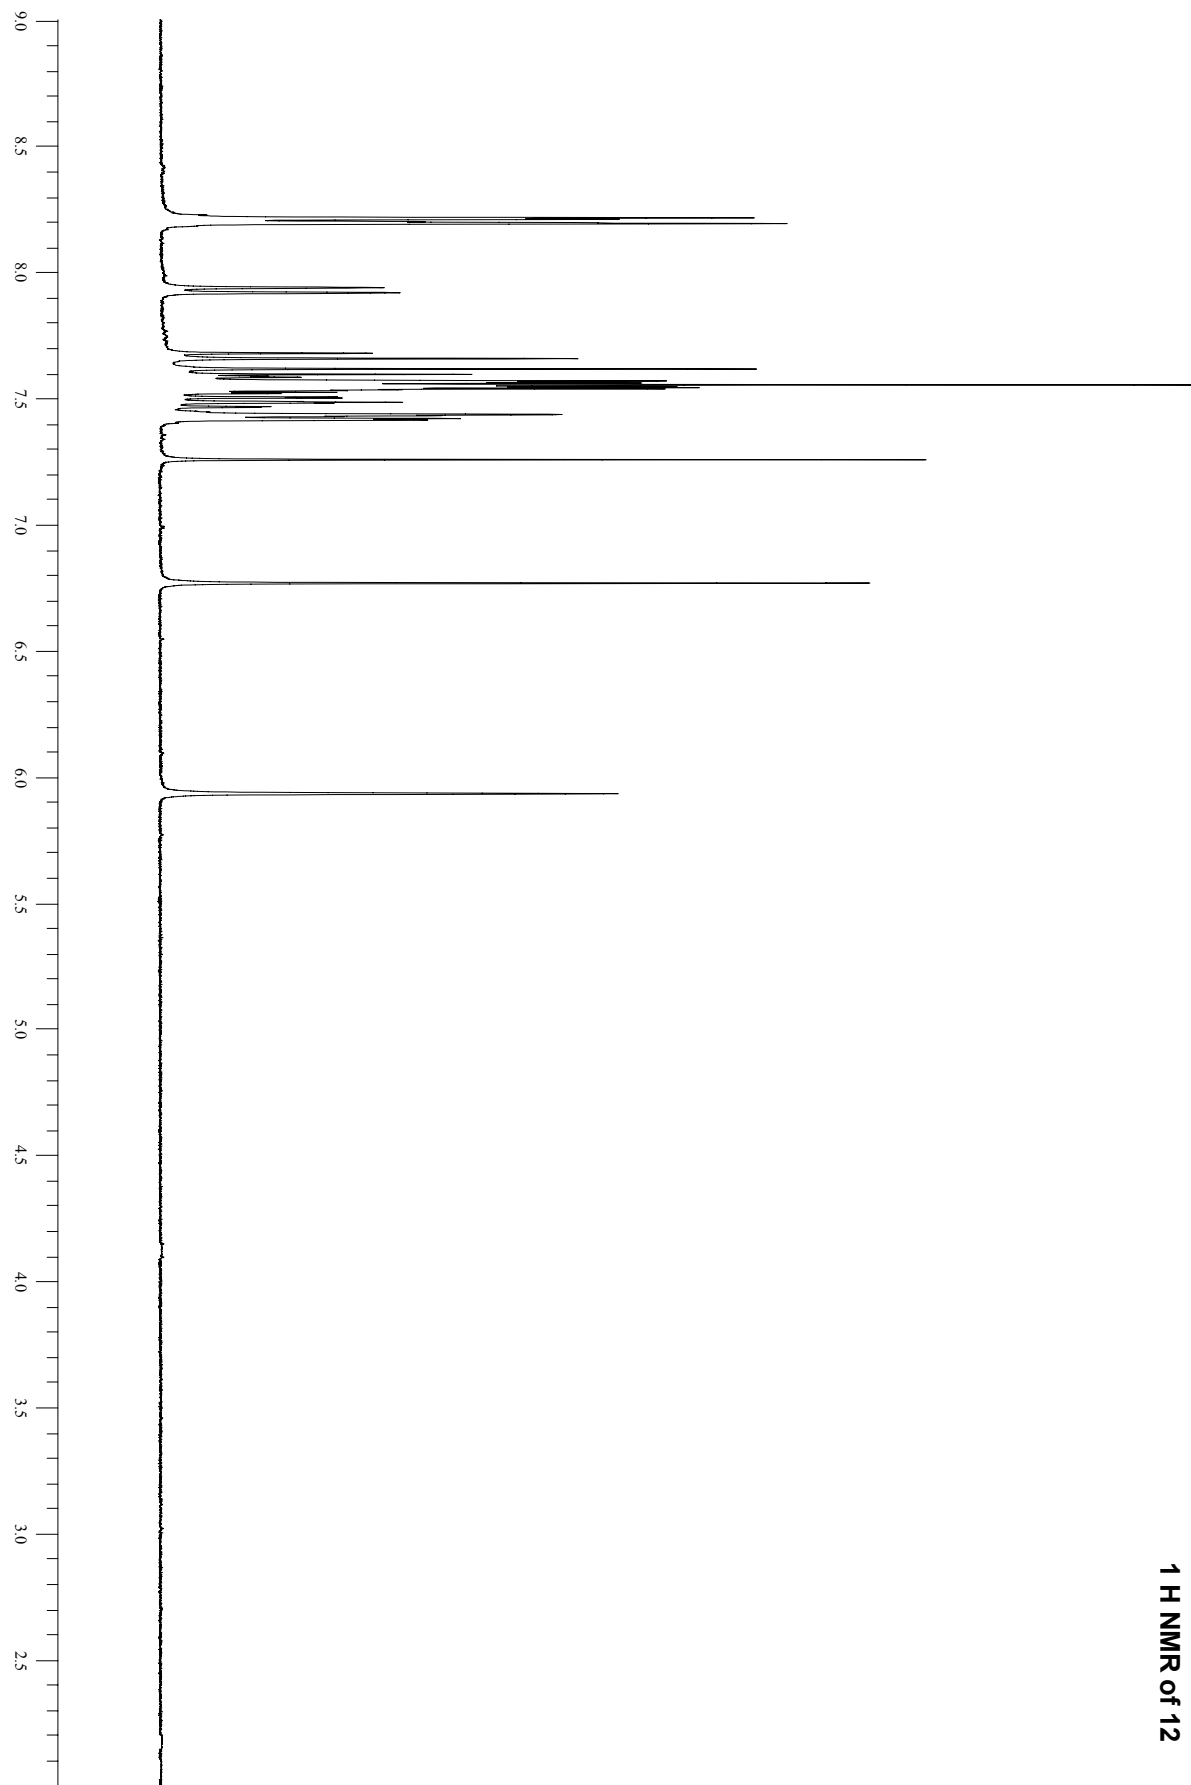



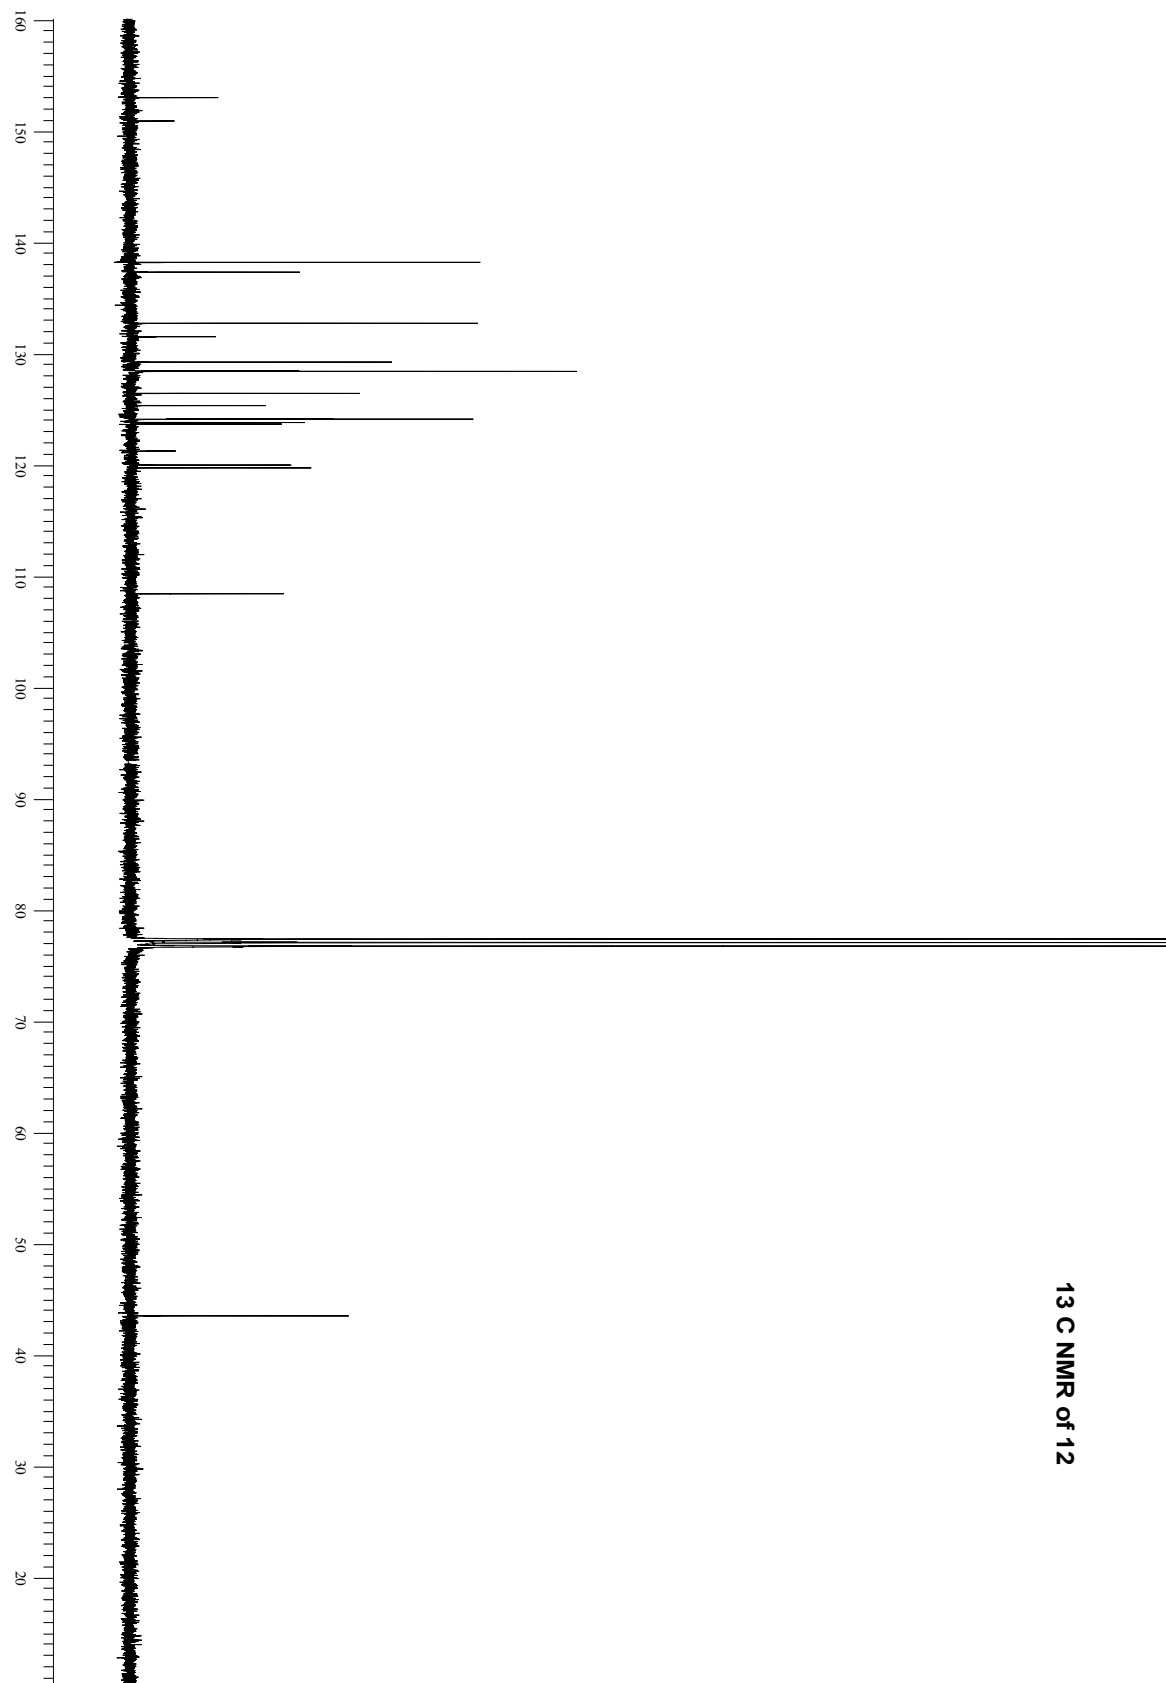

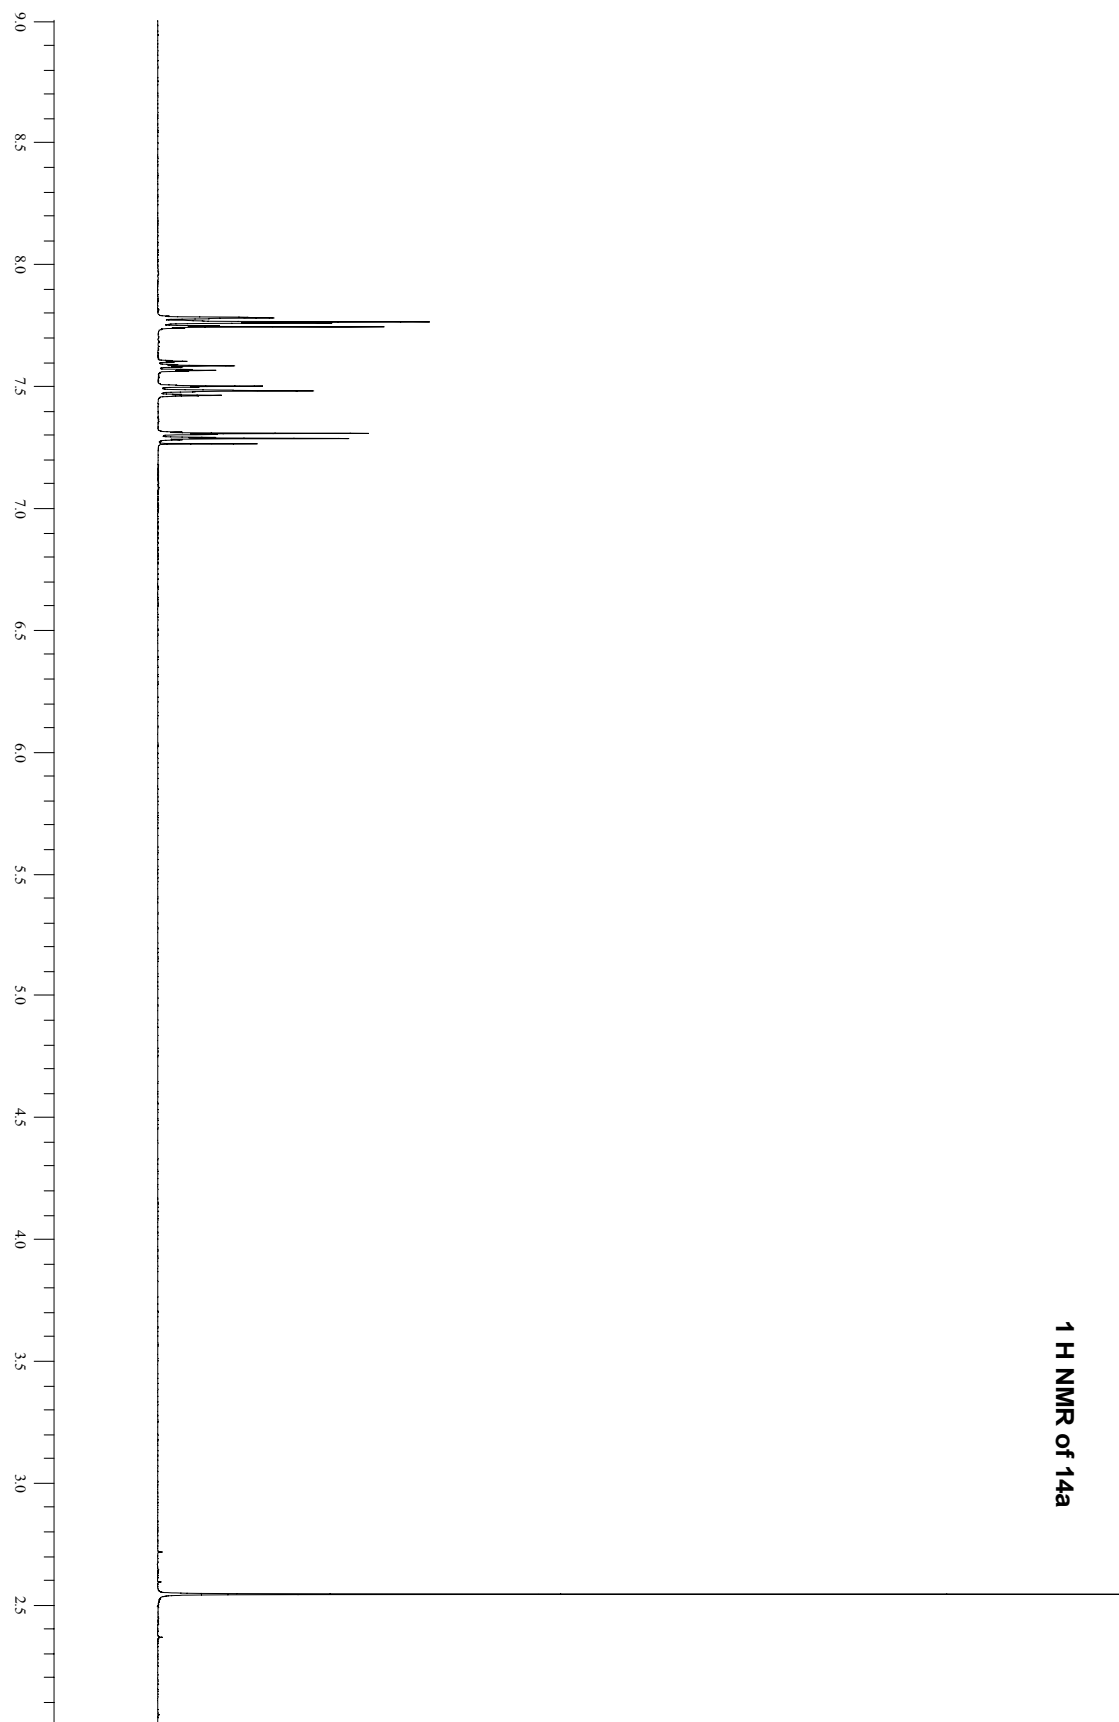

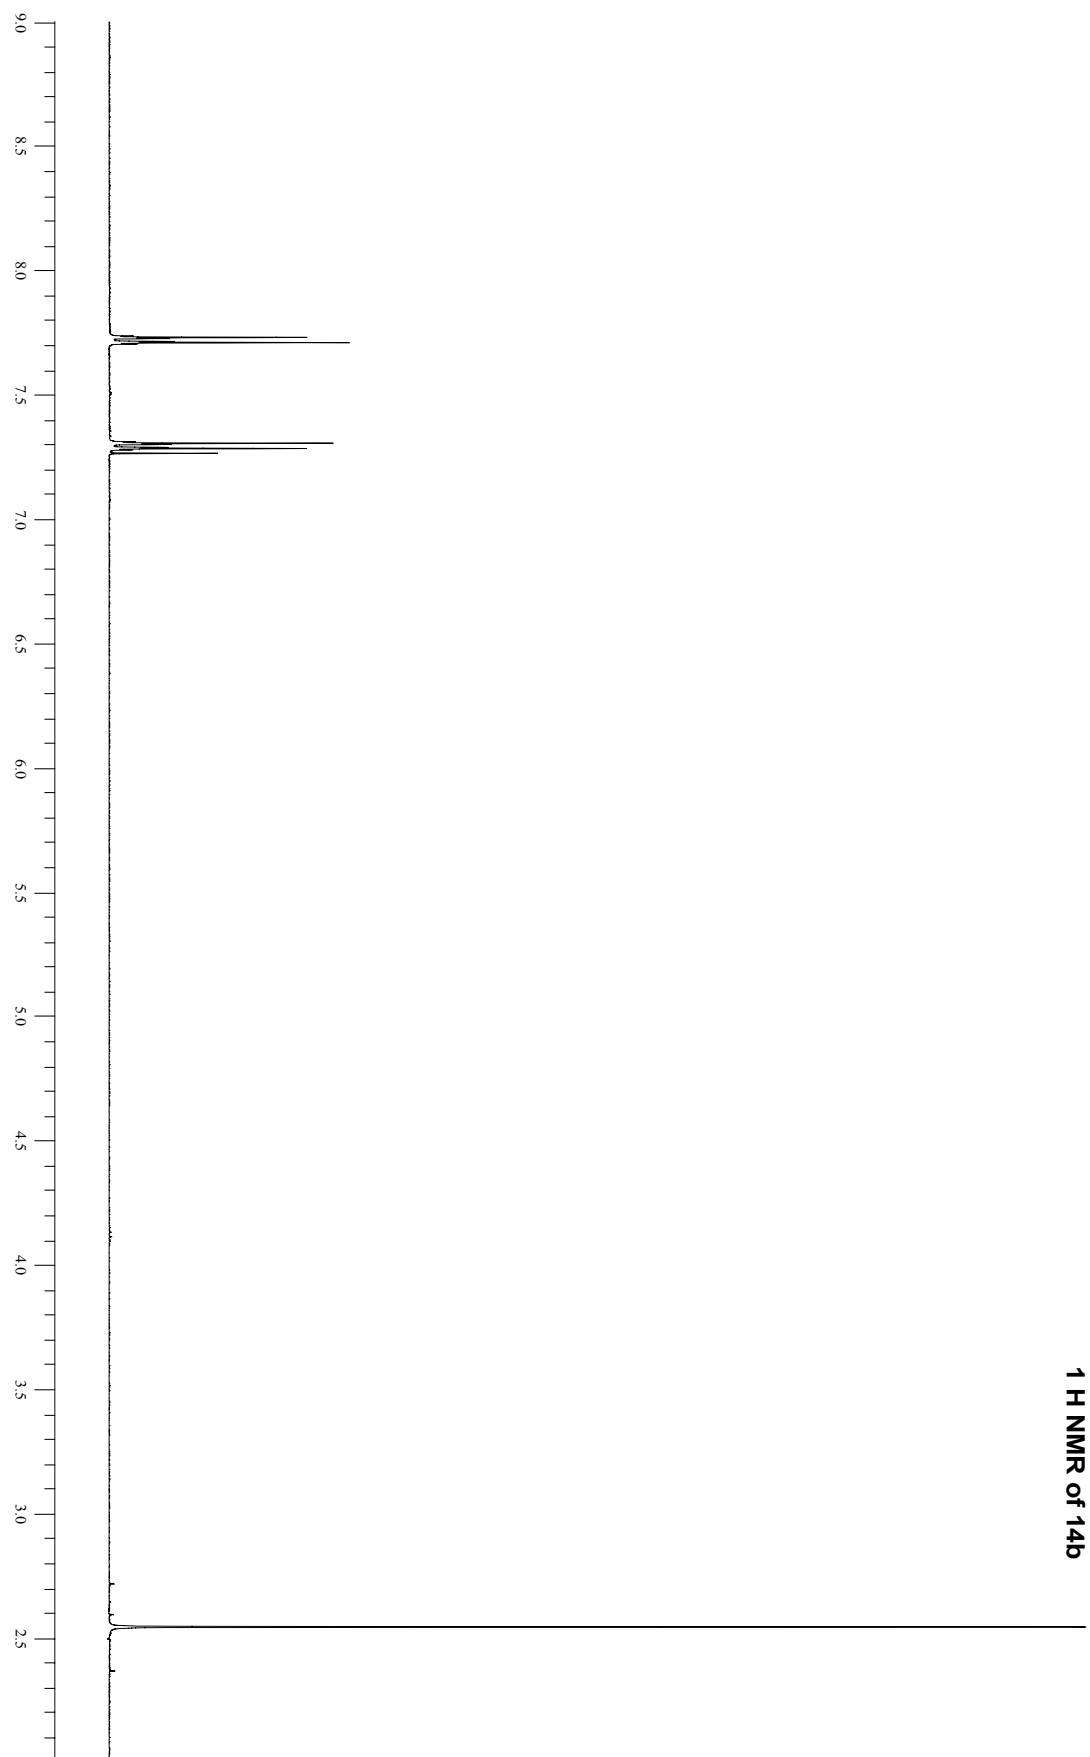

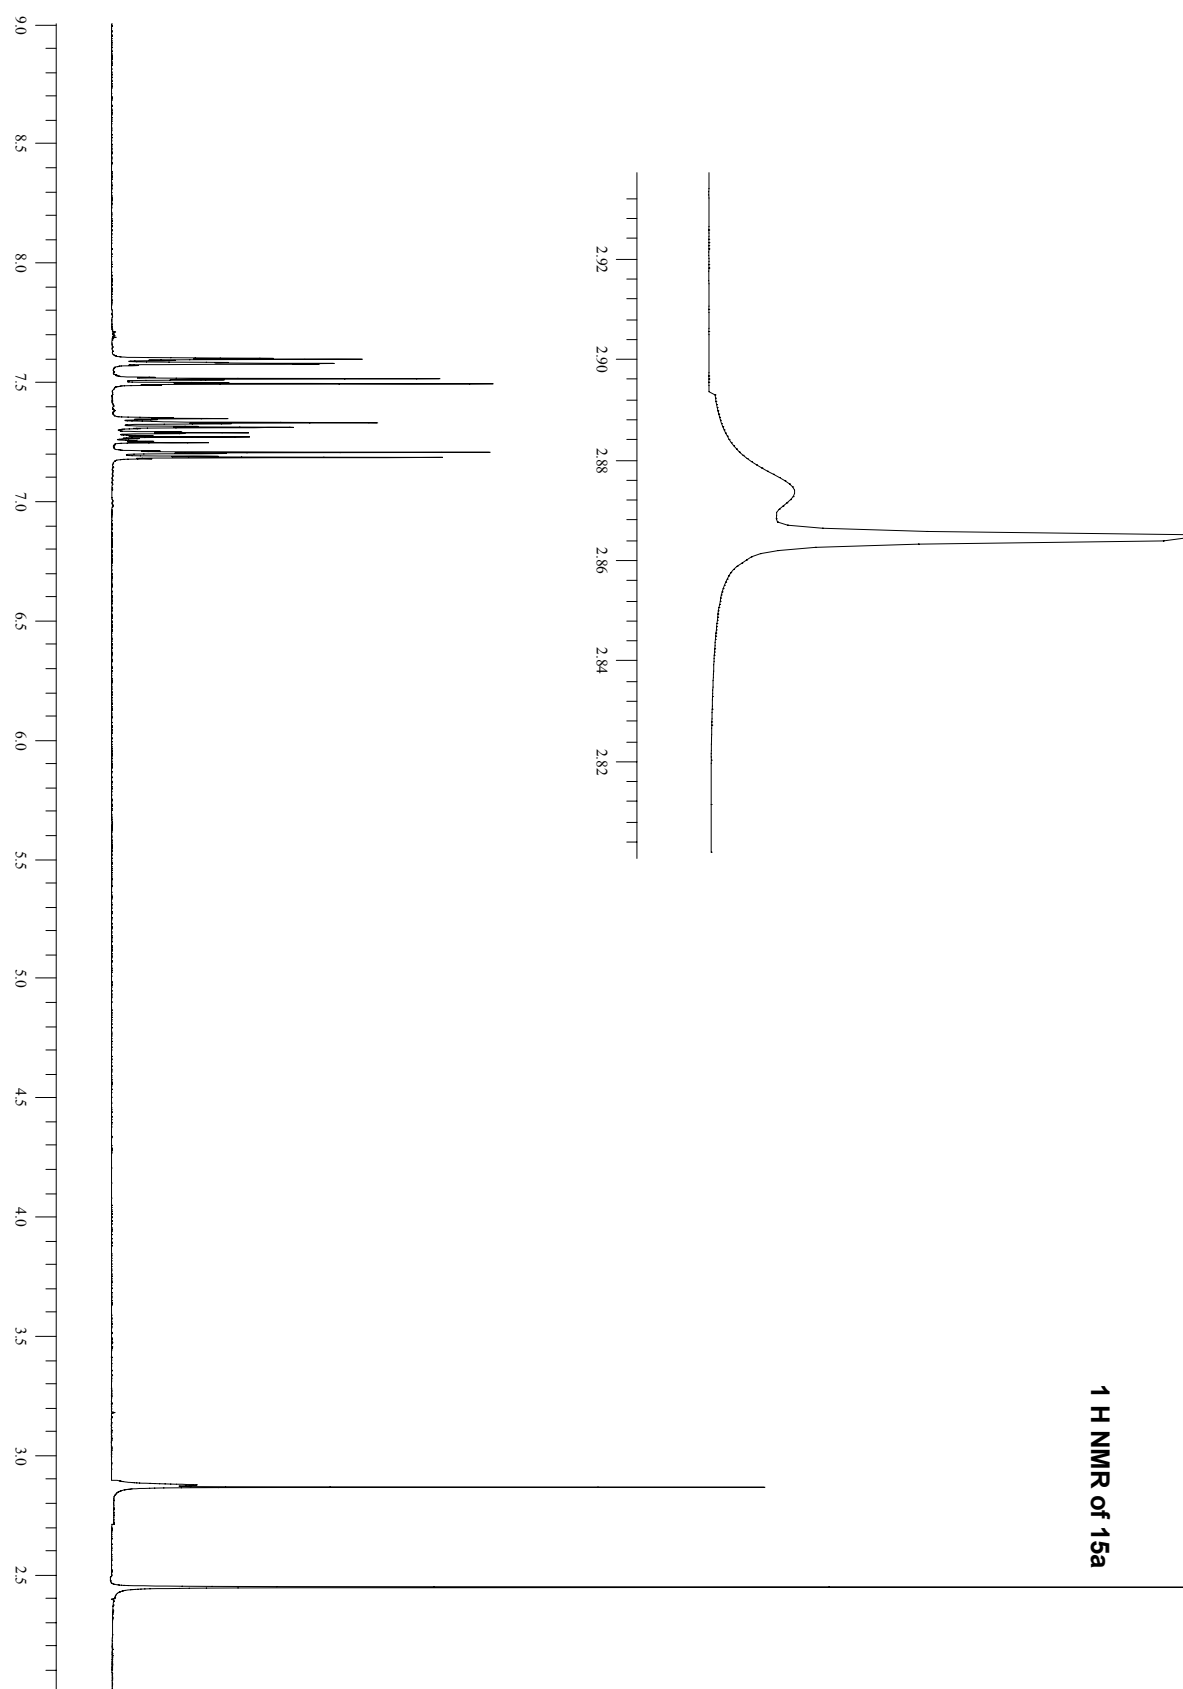

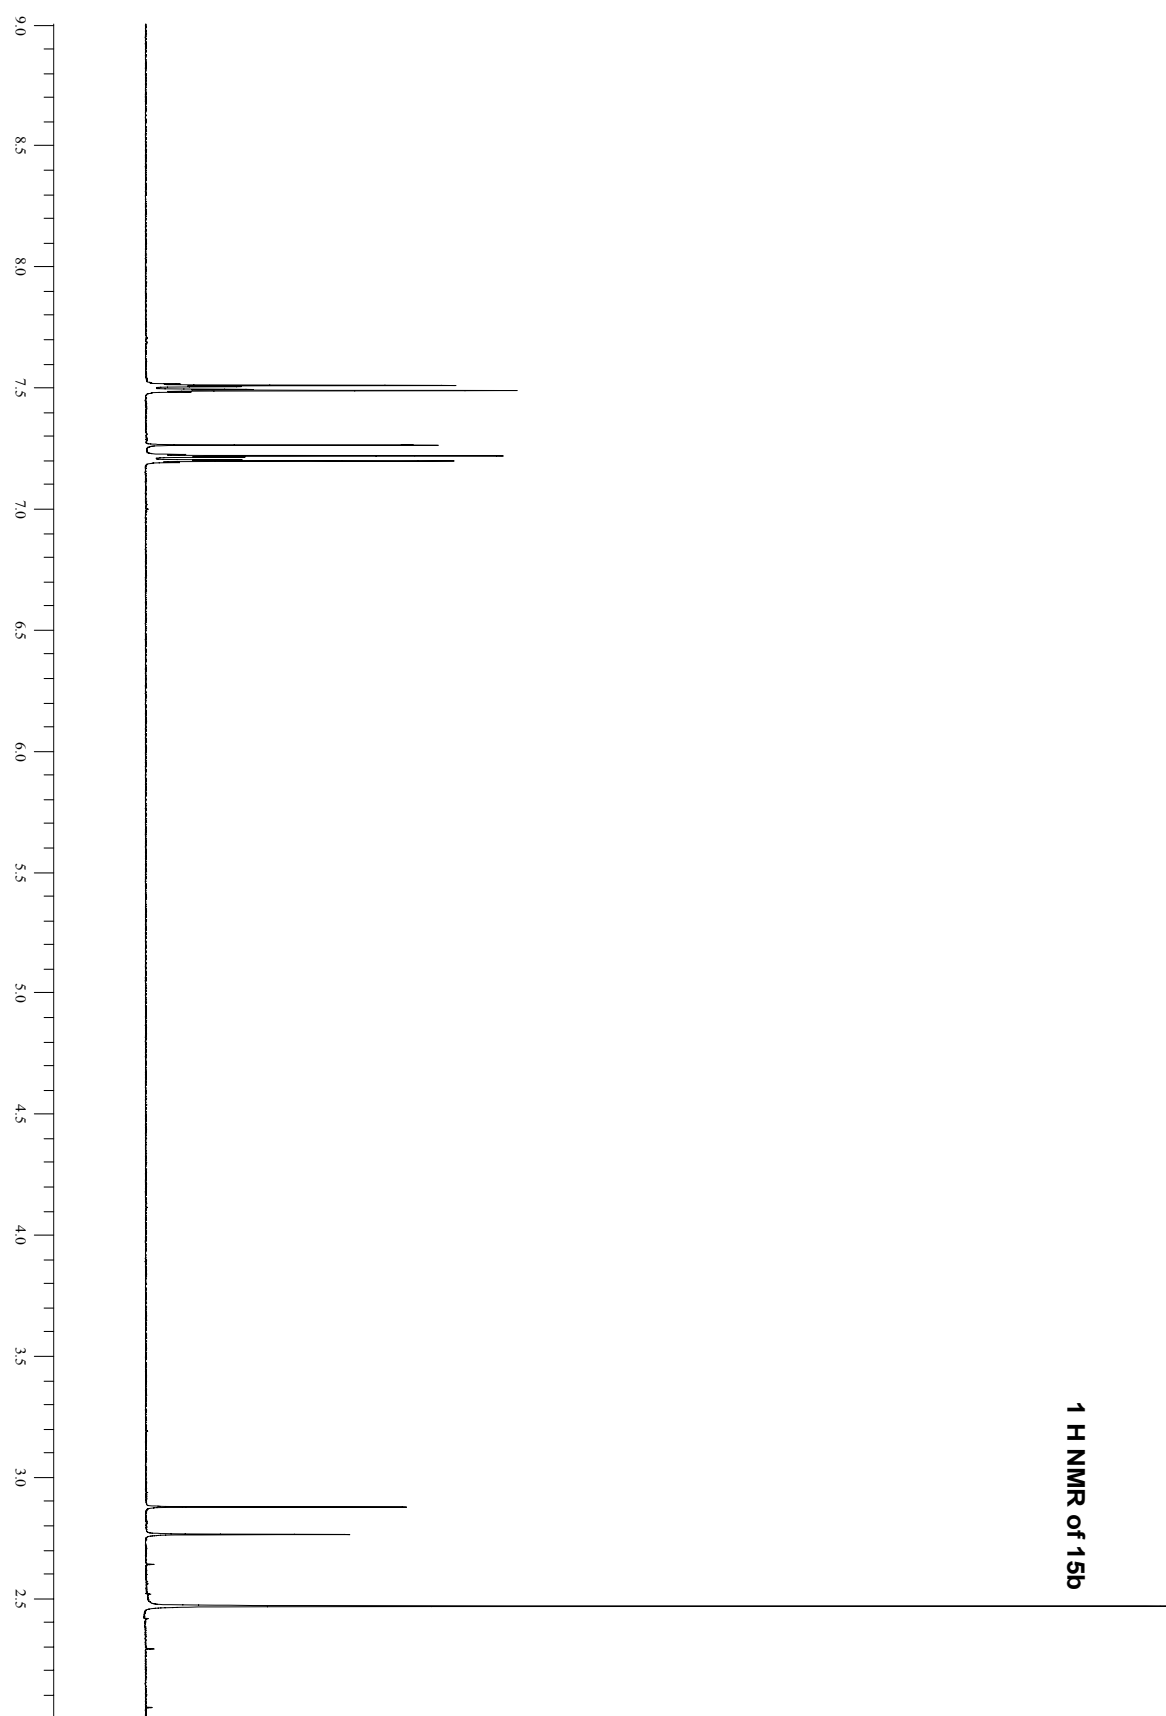

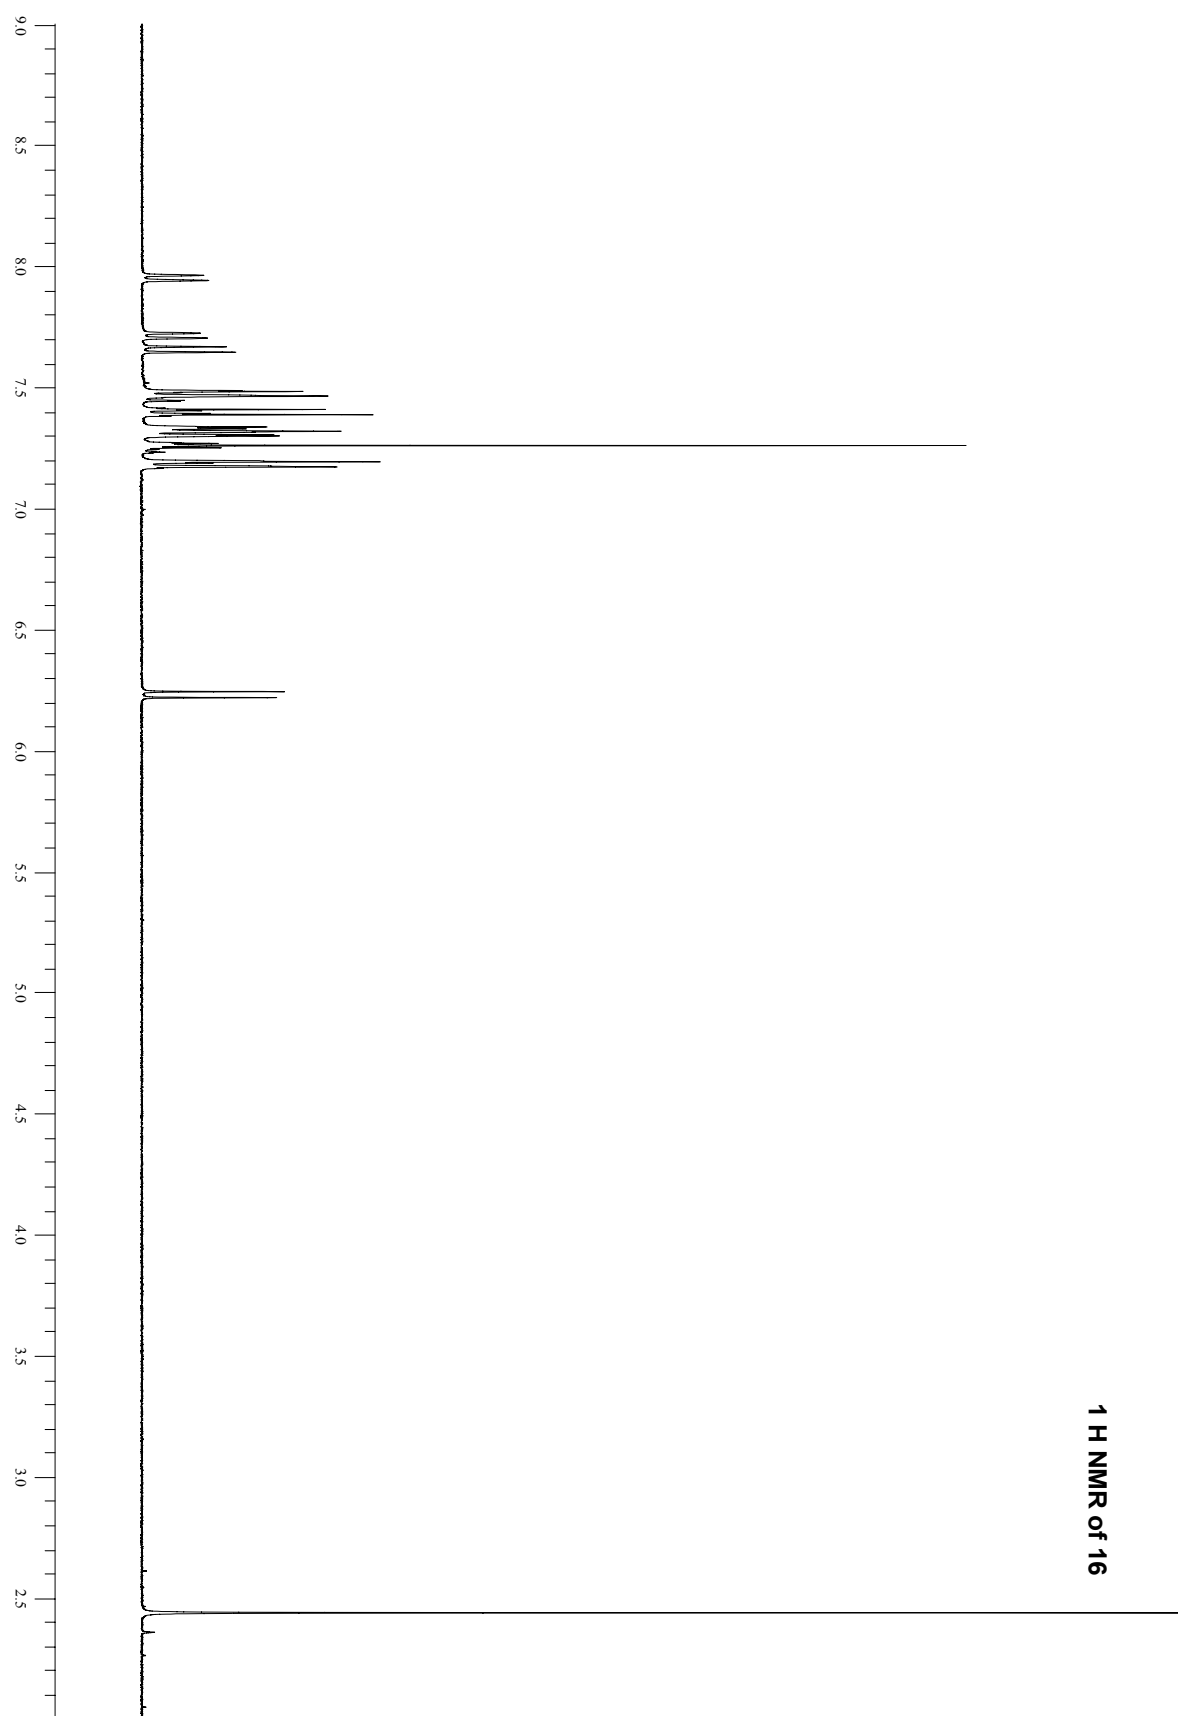

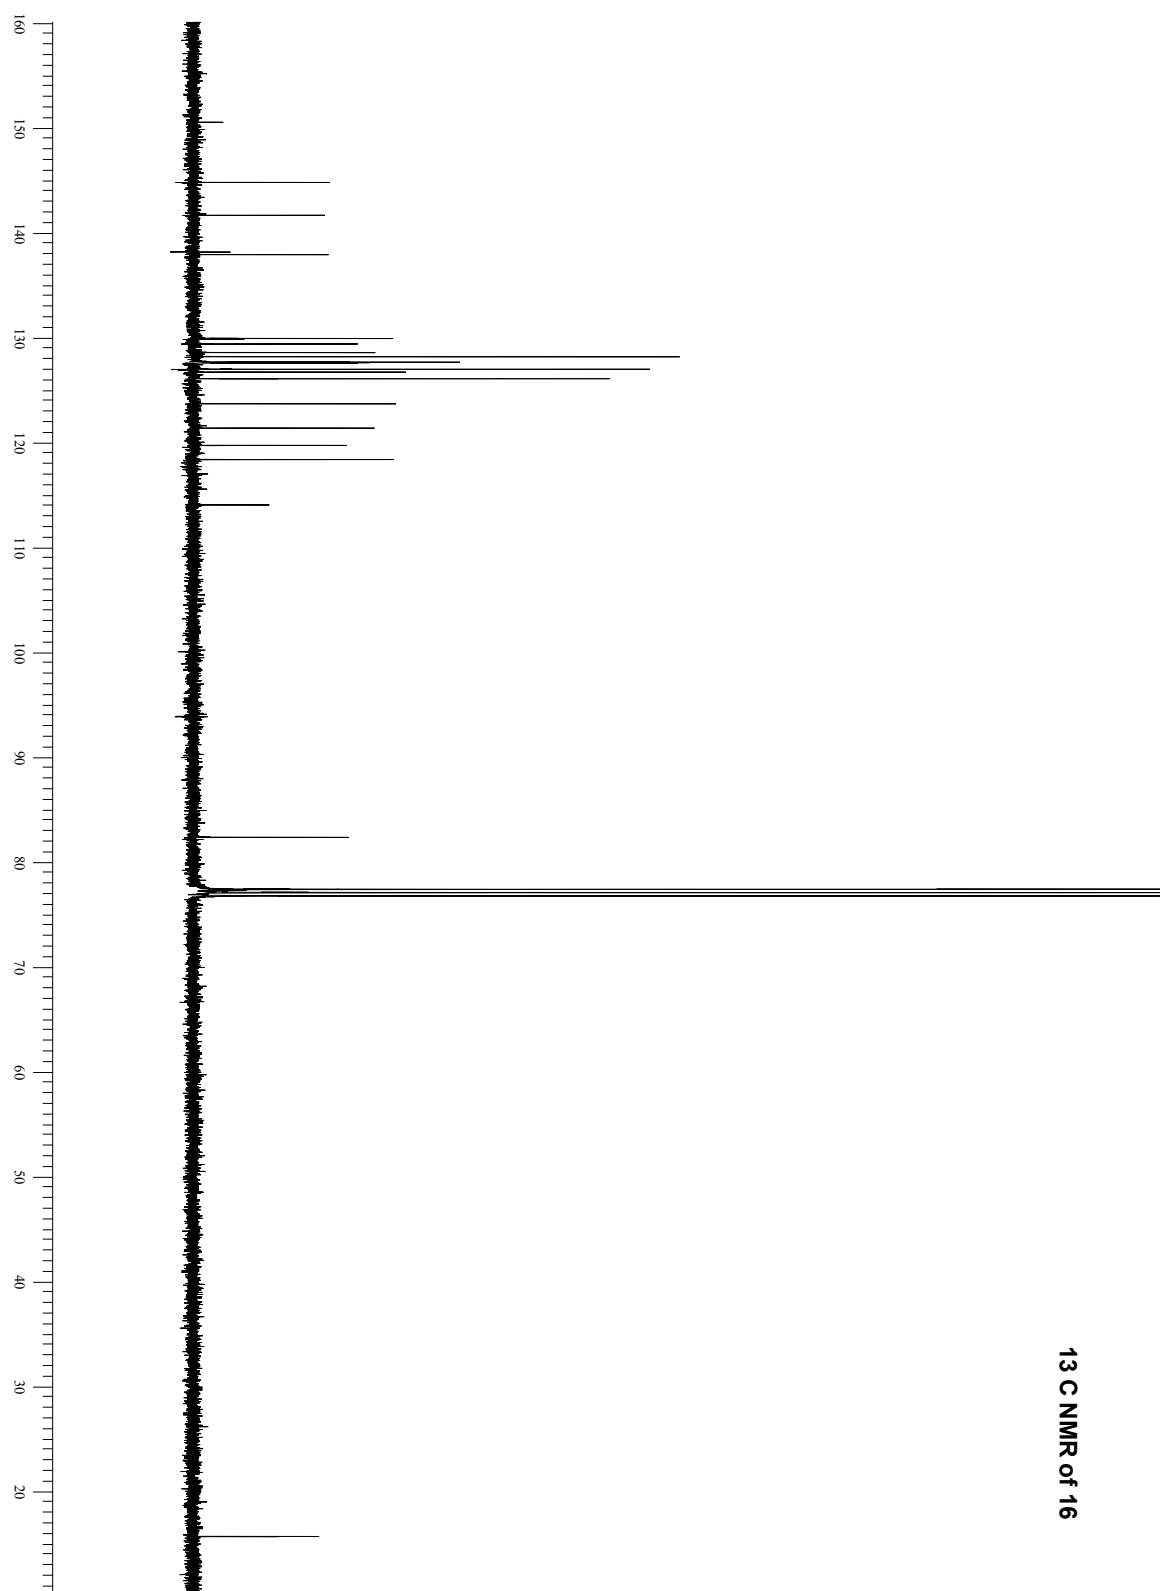

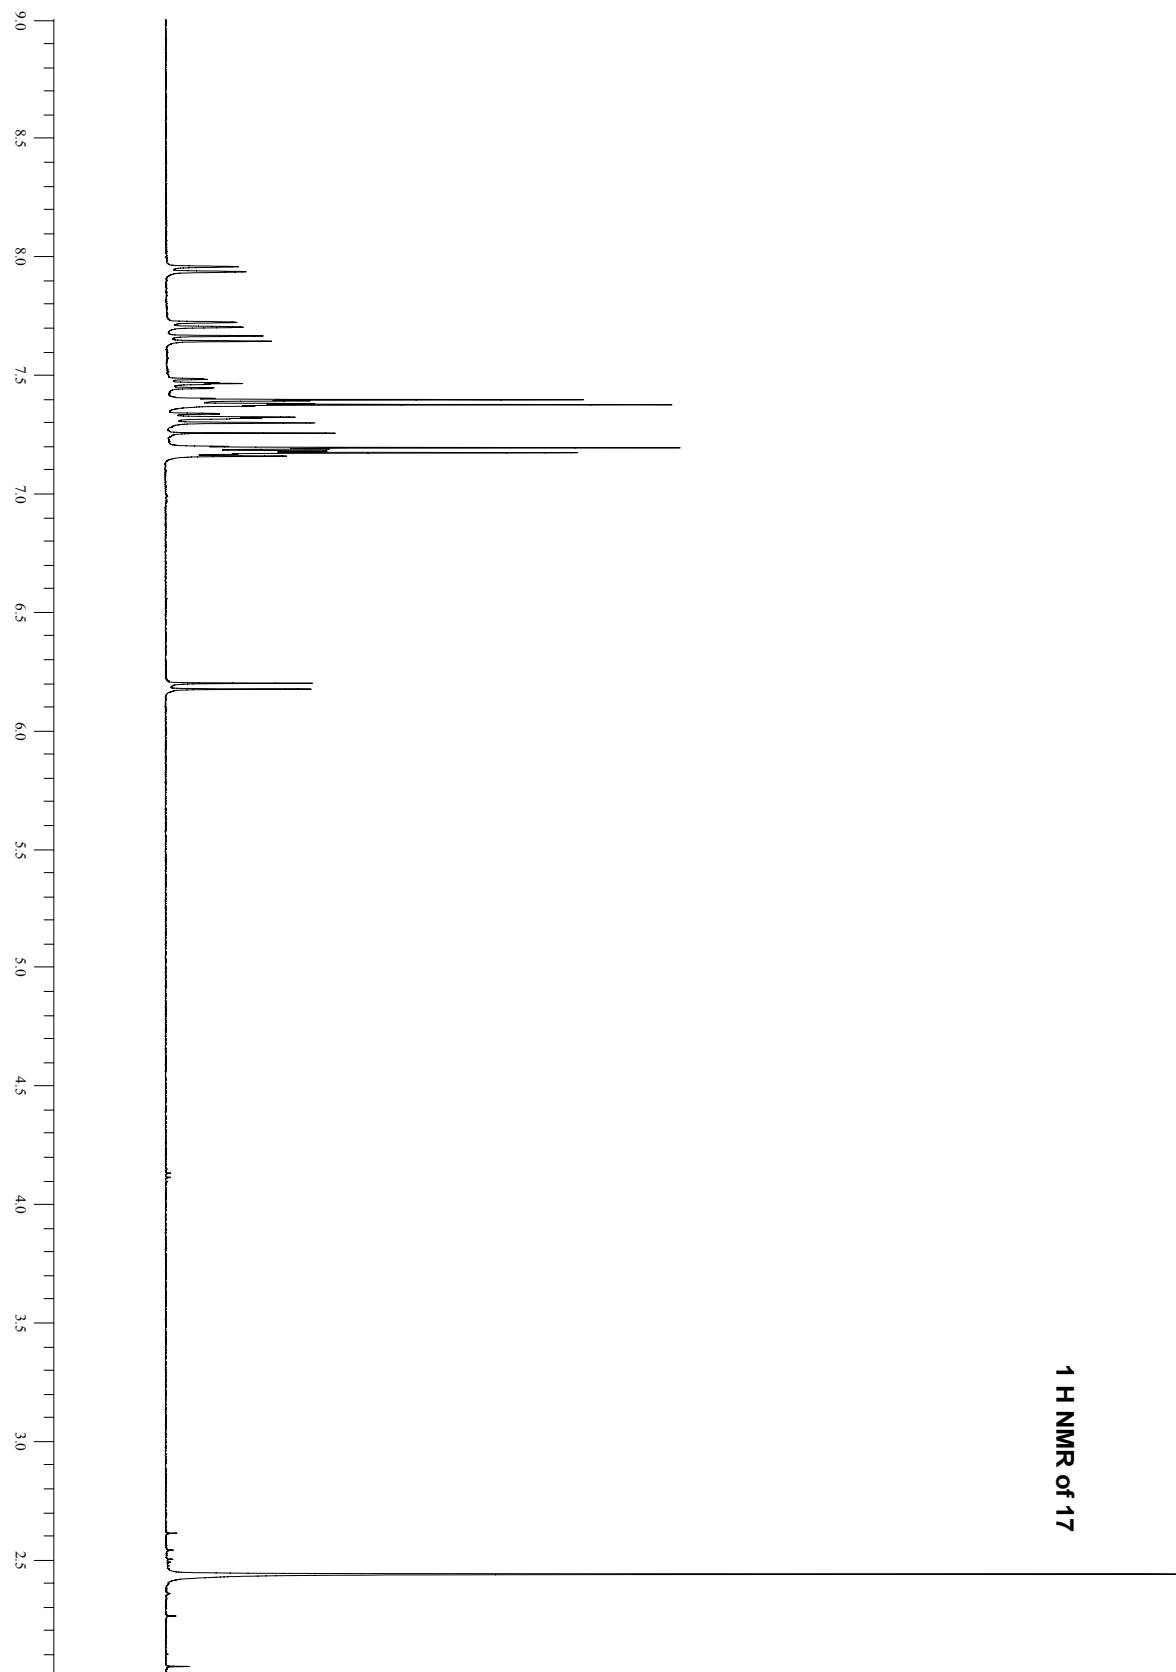



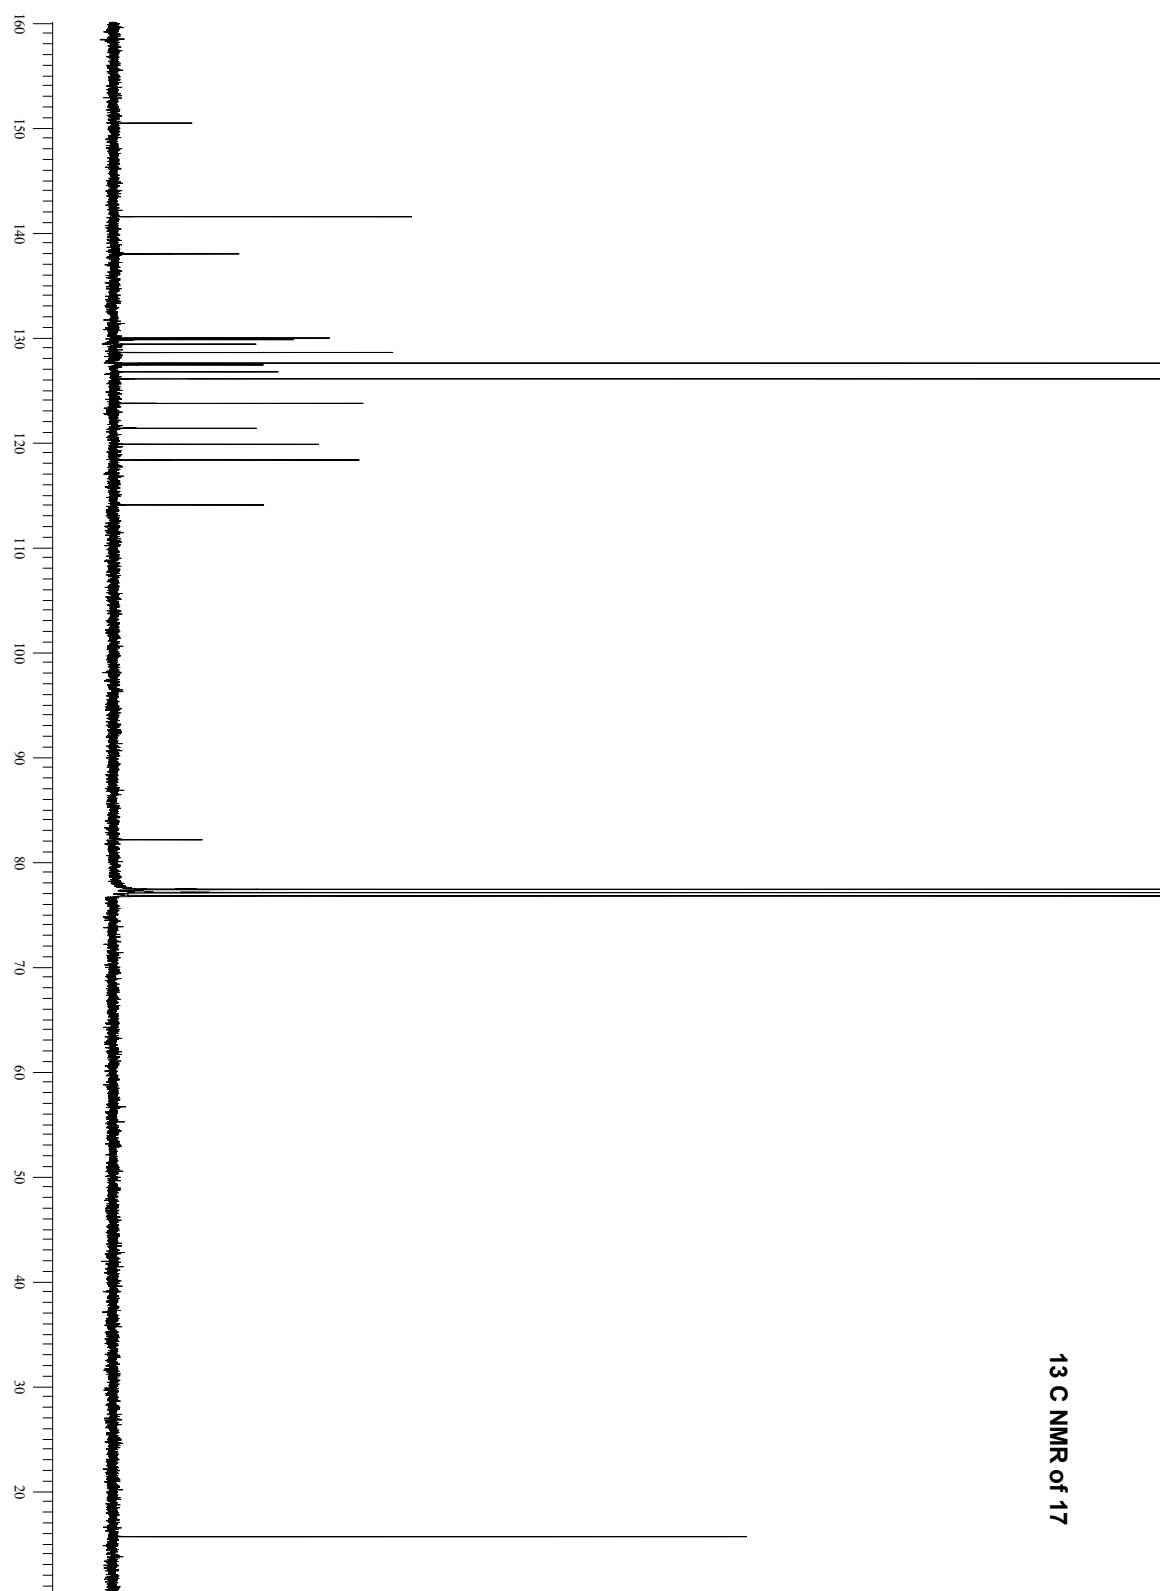

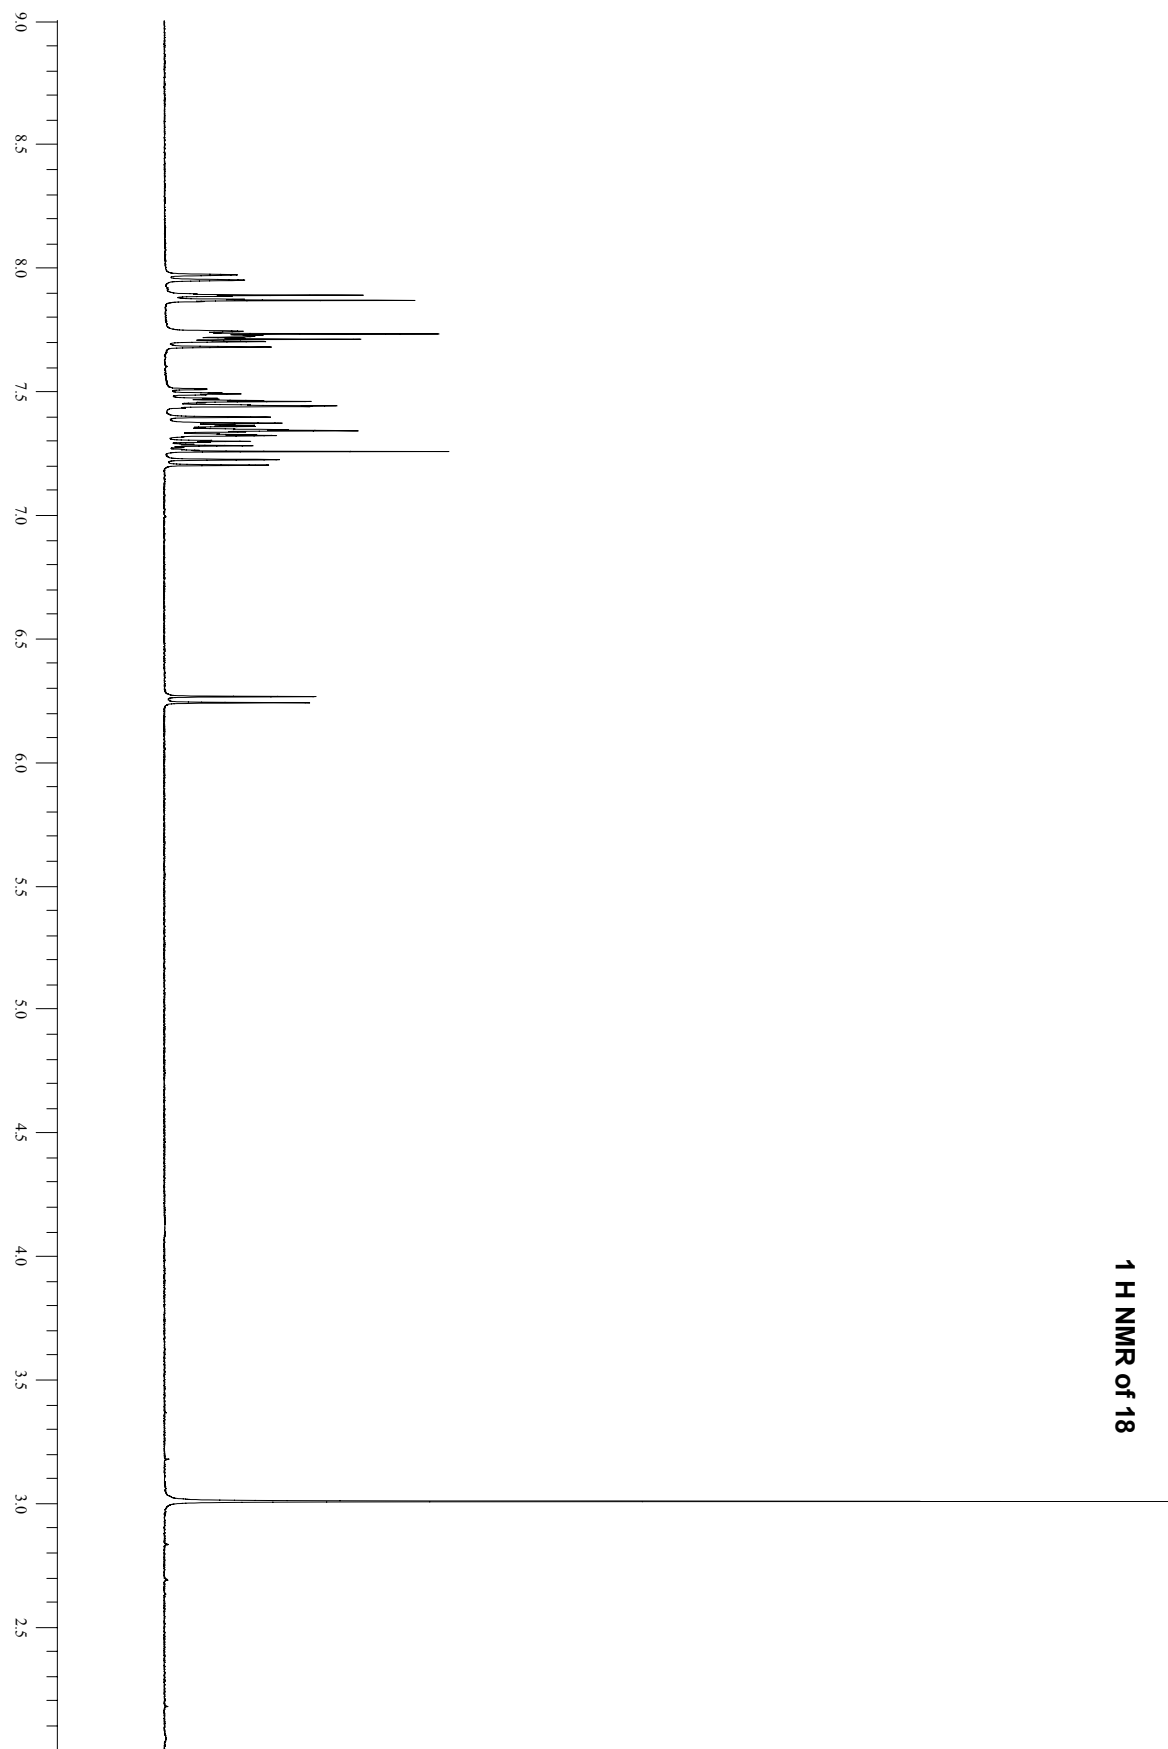

**<sup>1</sup>H NMR of 18**

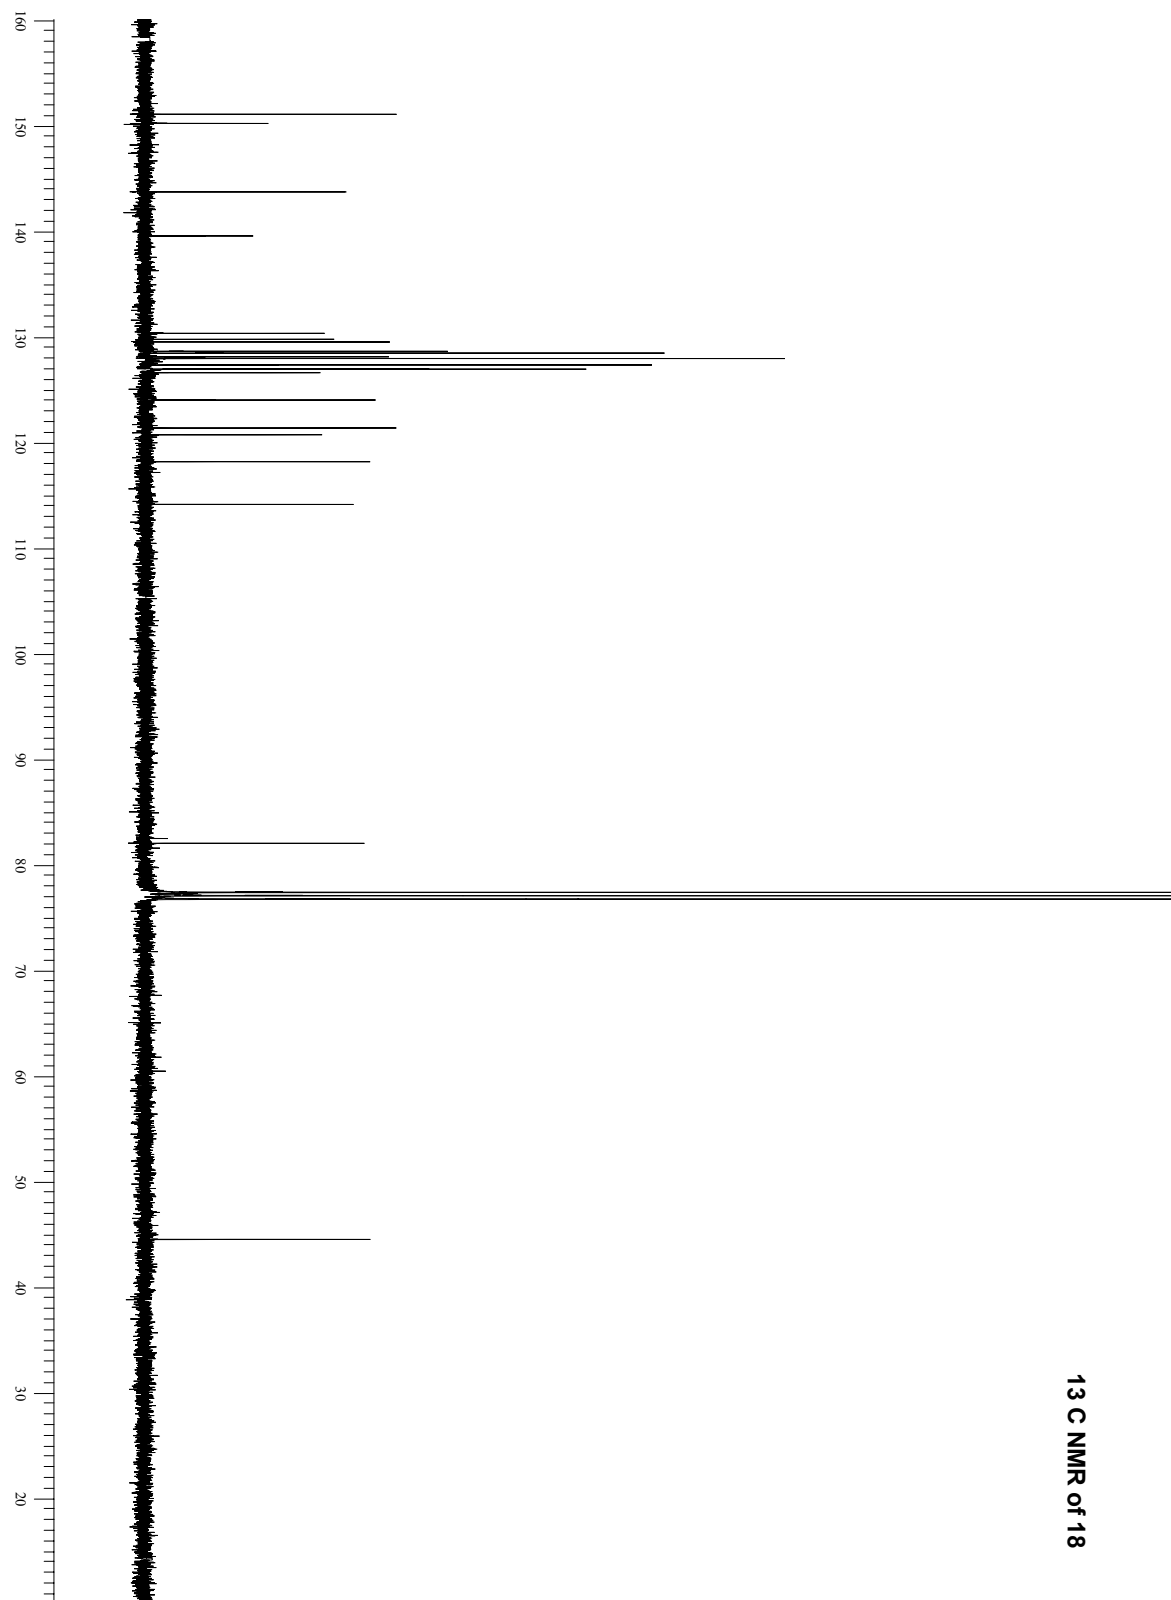

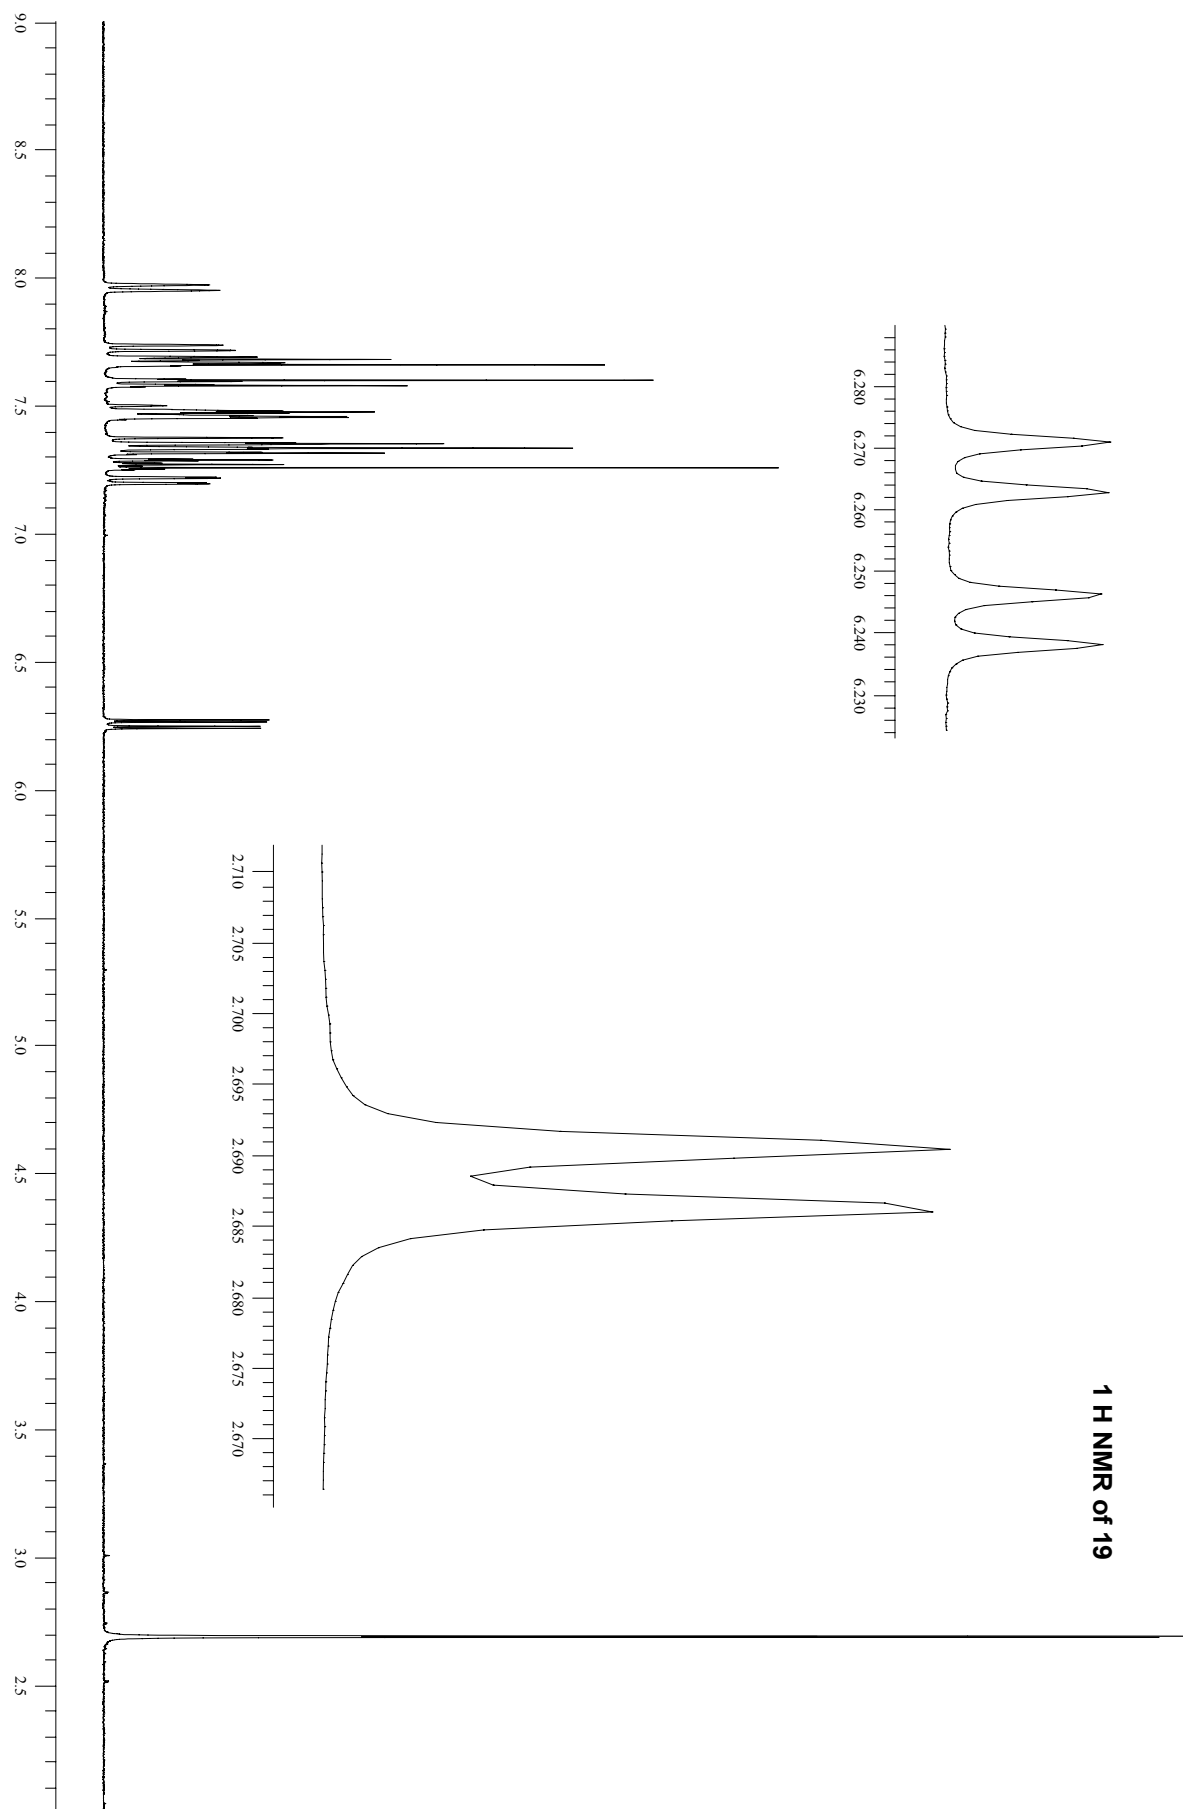

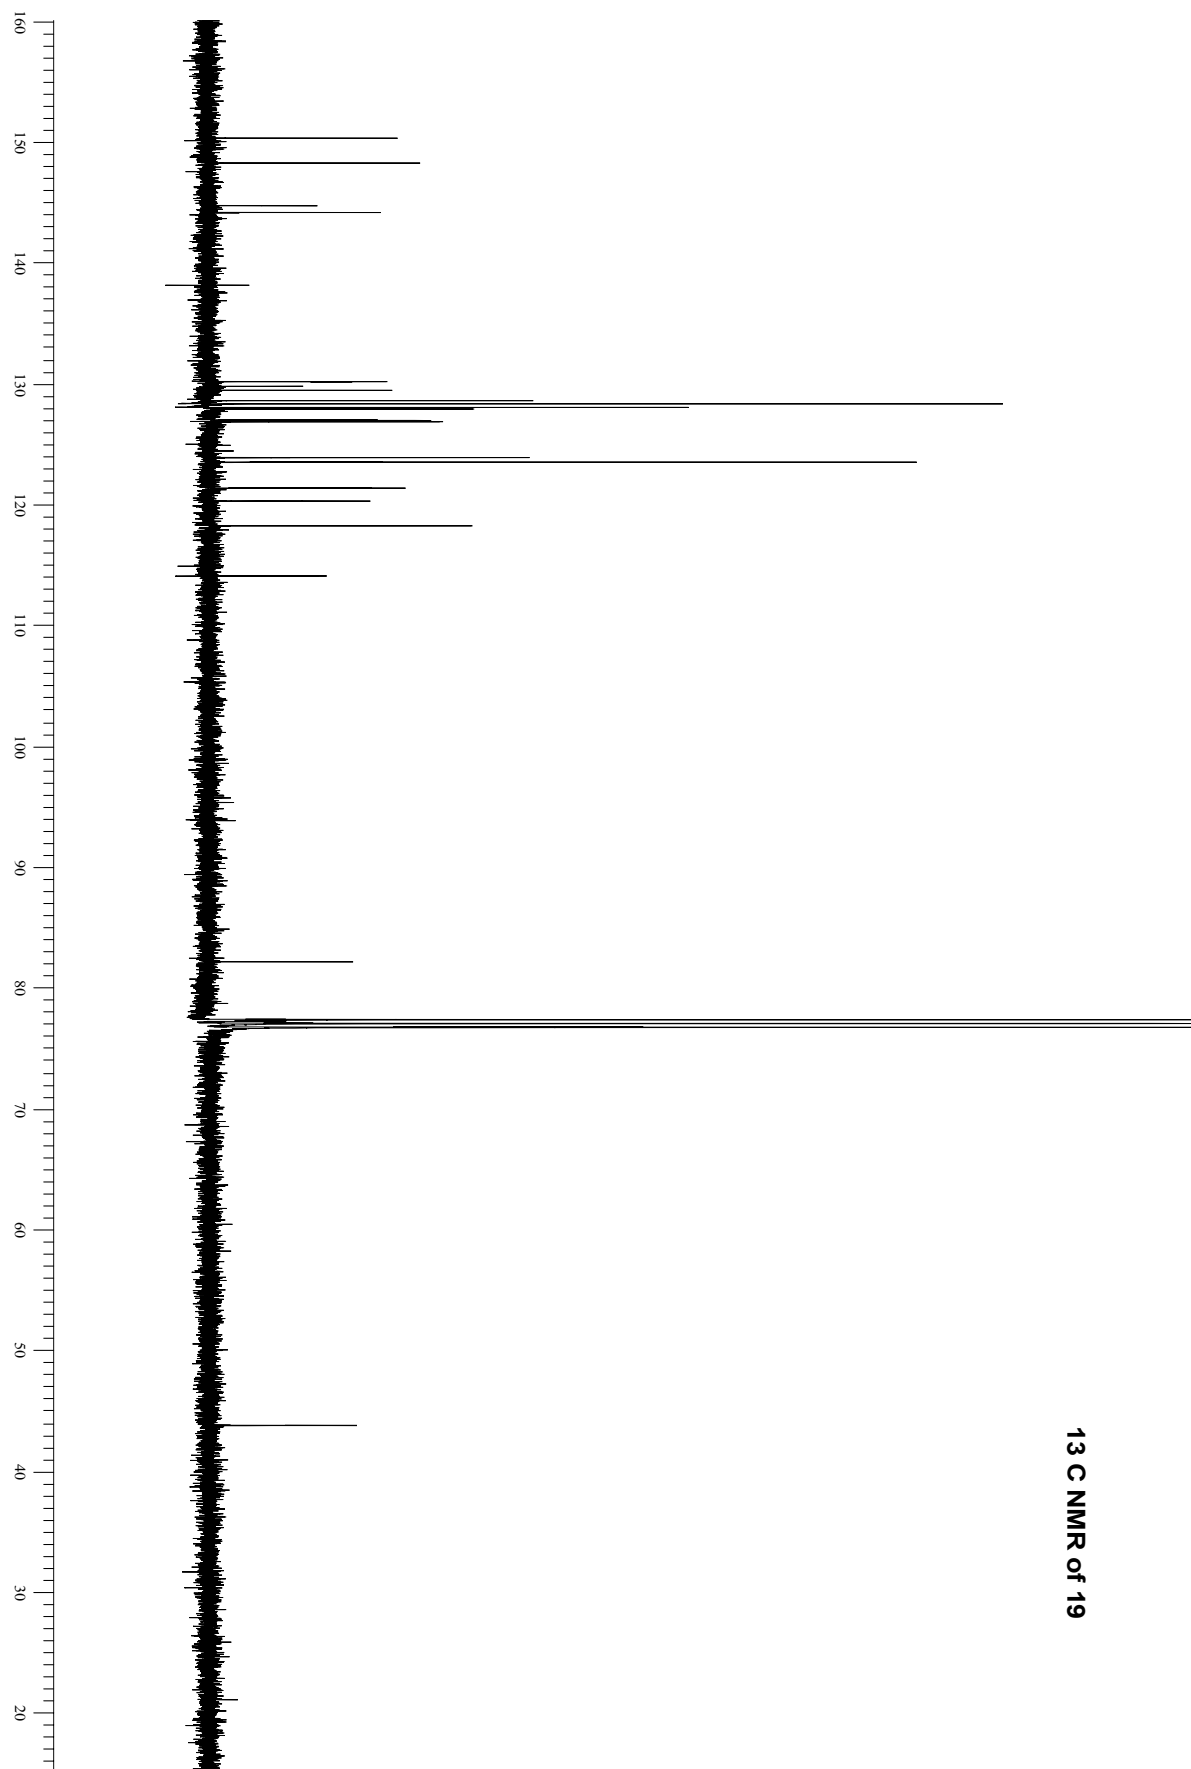

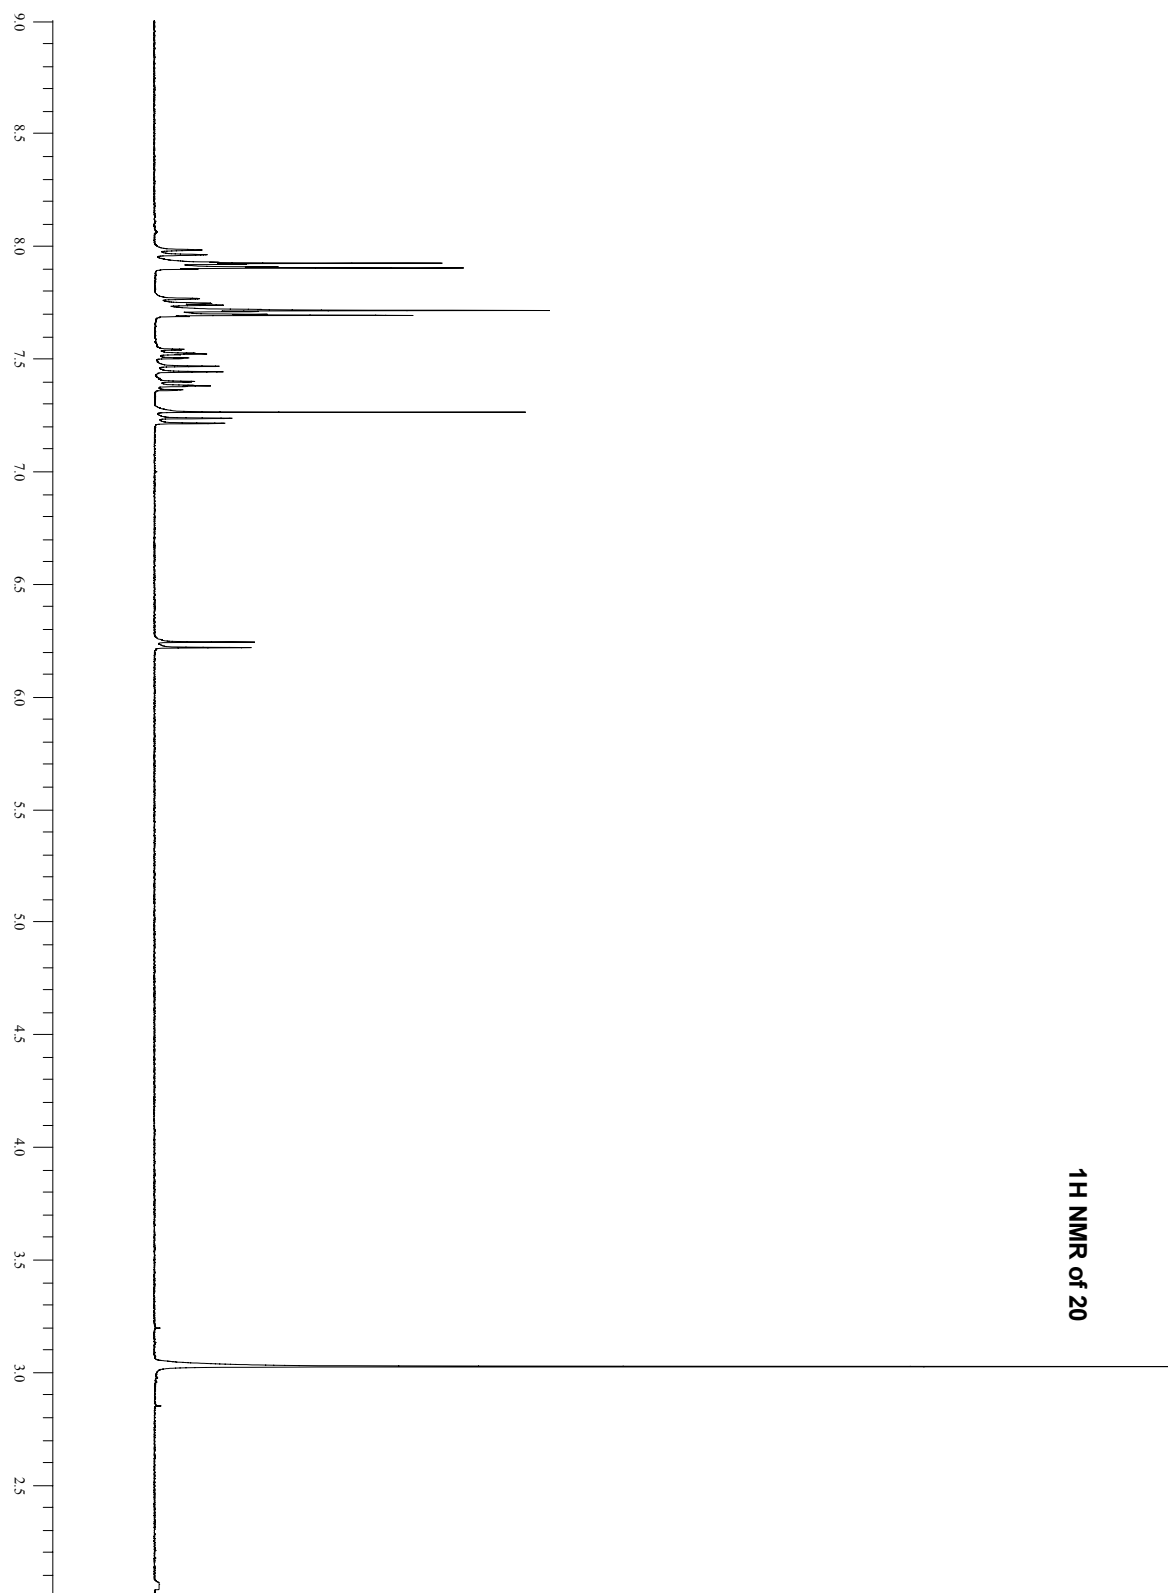

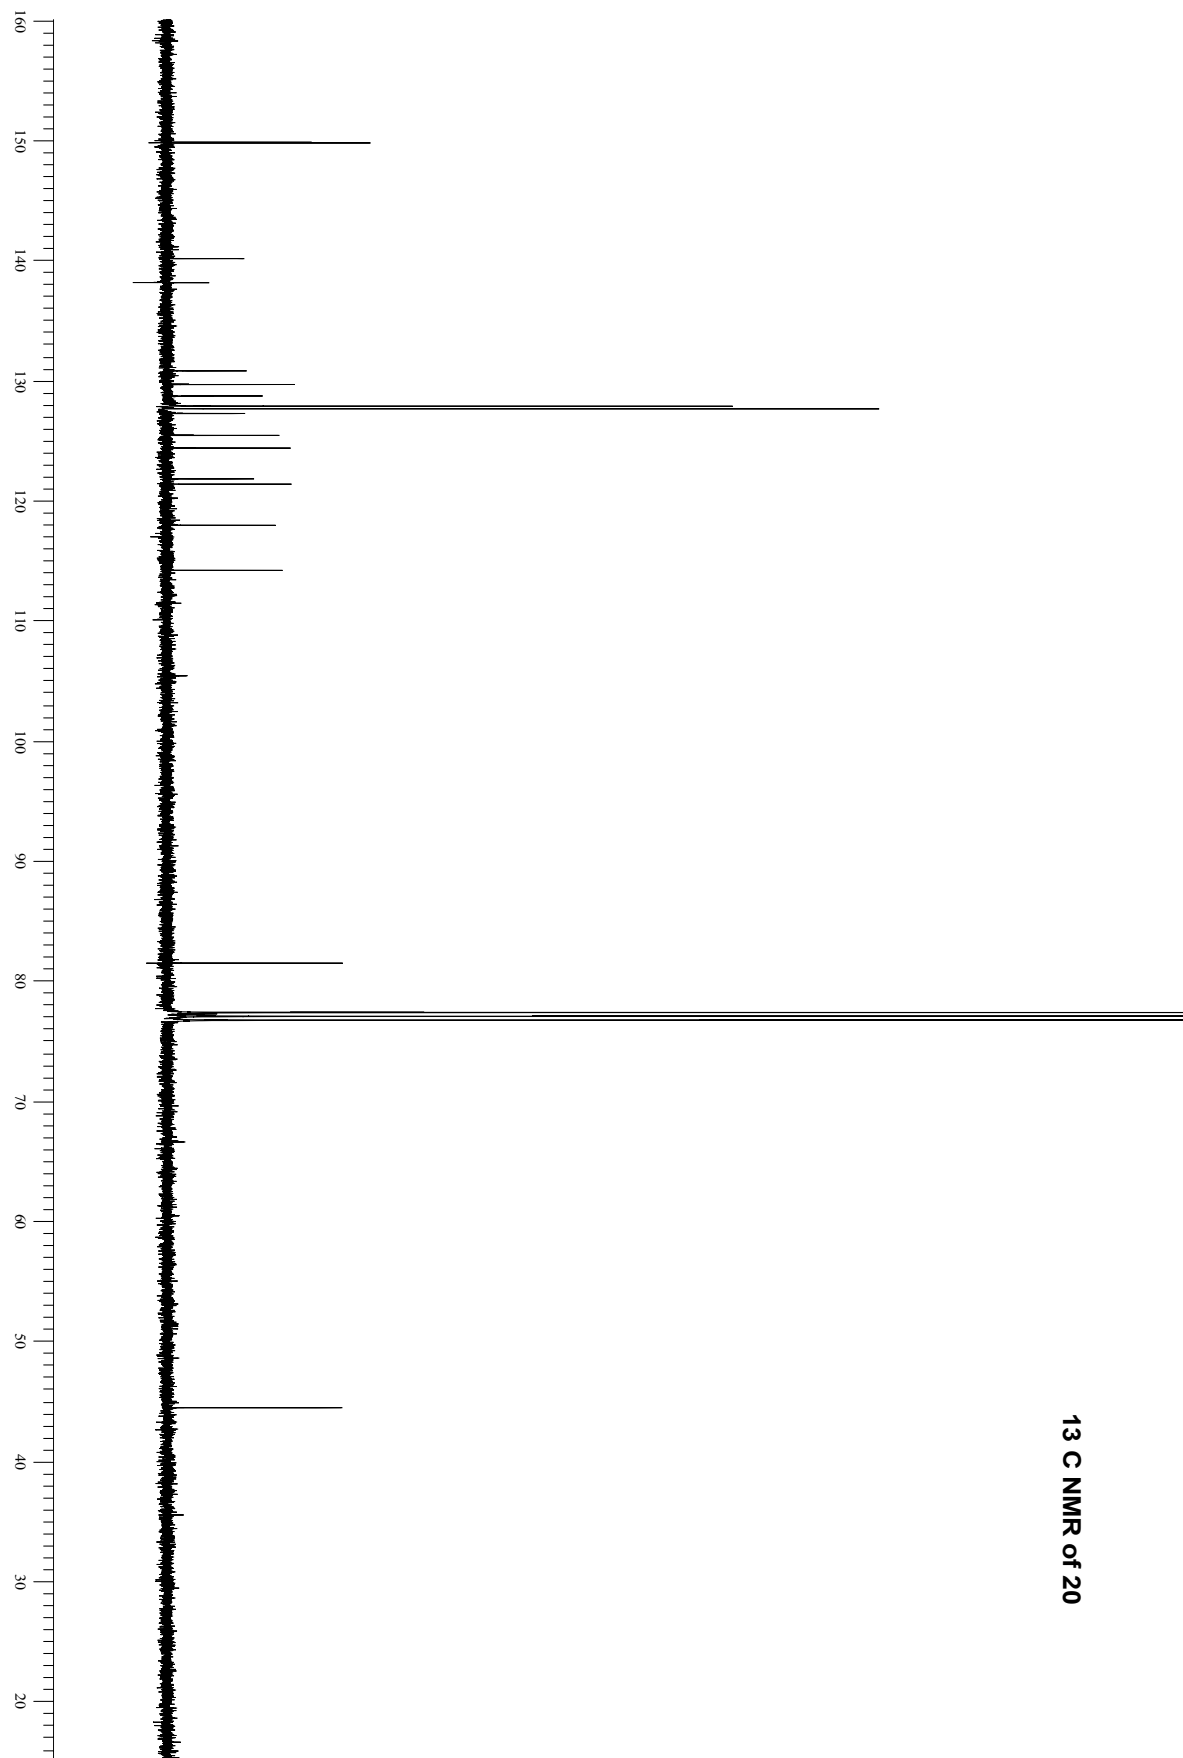

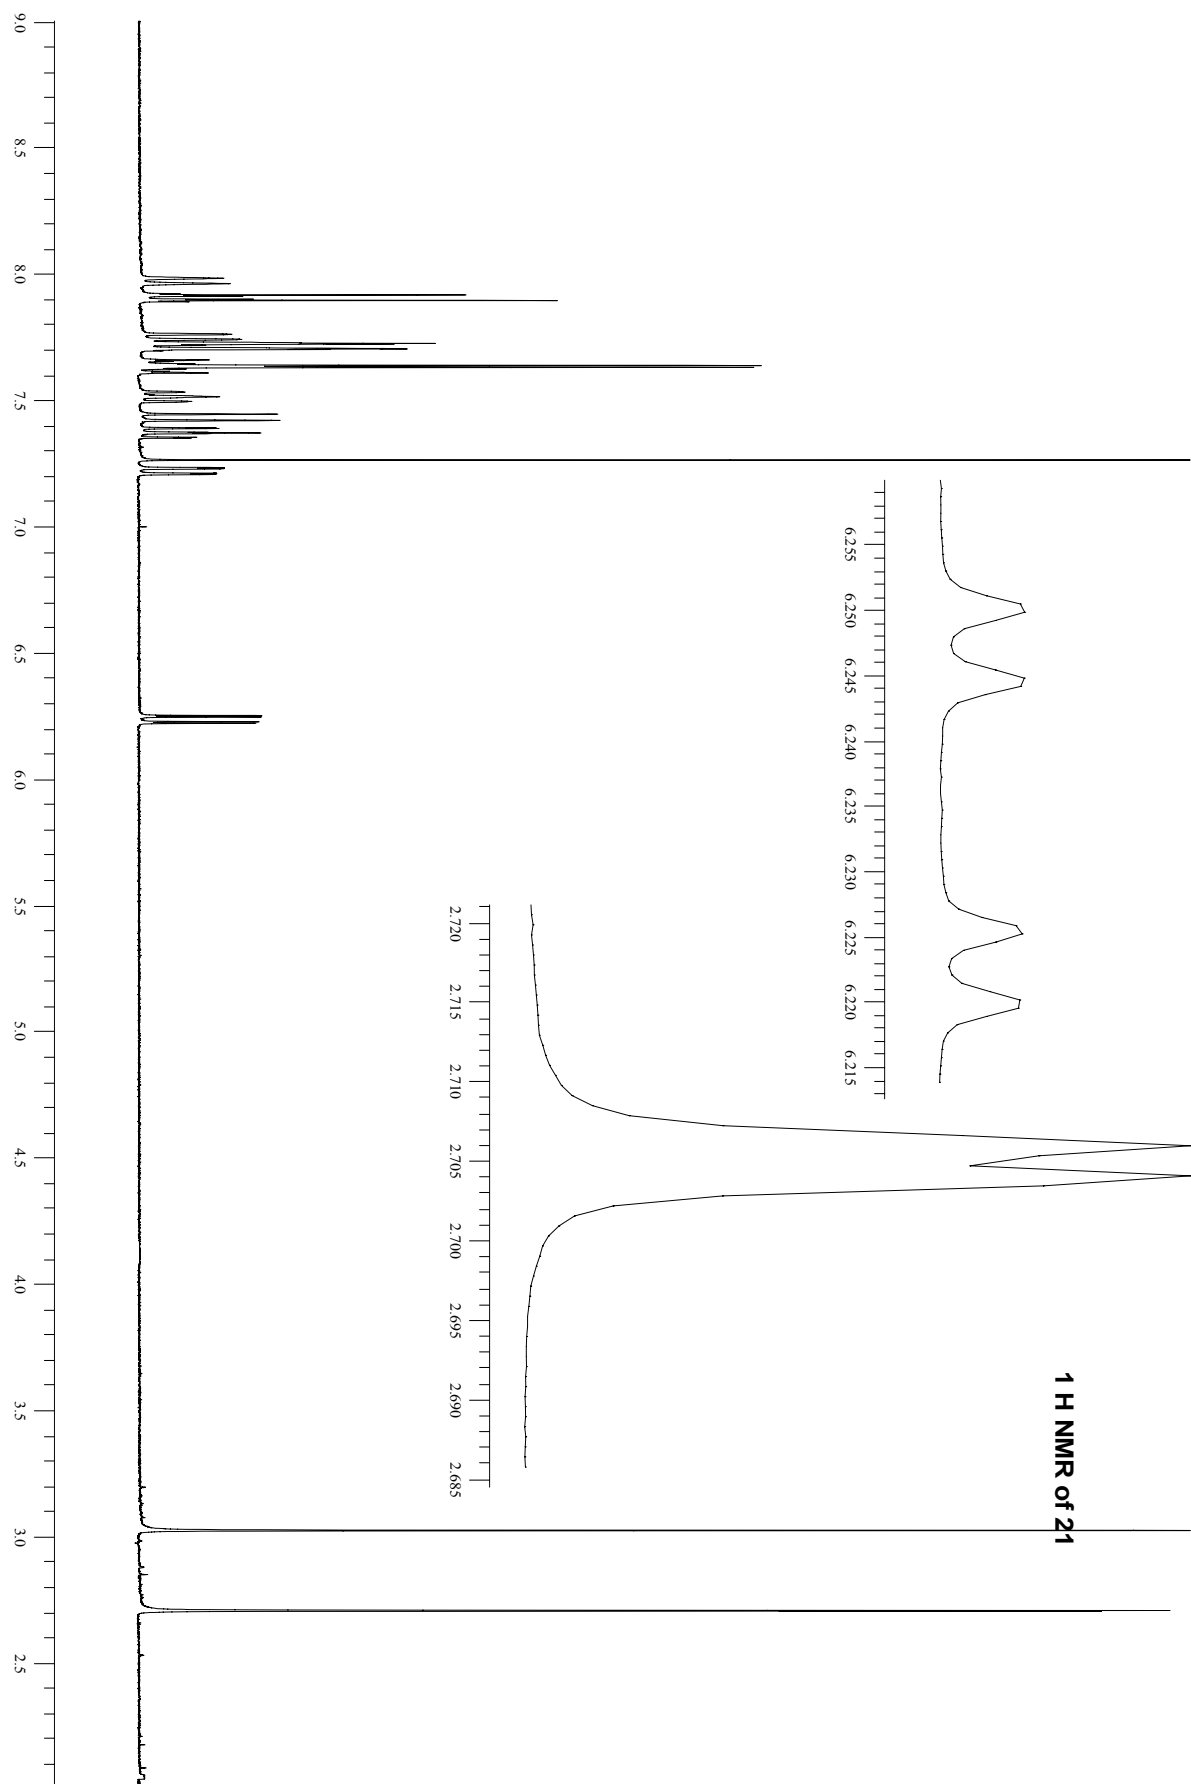



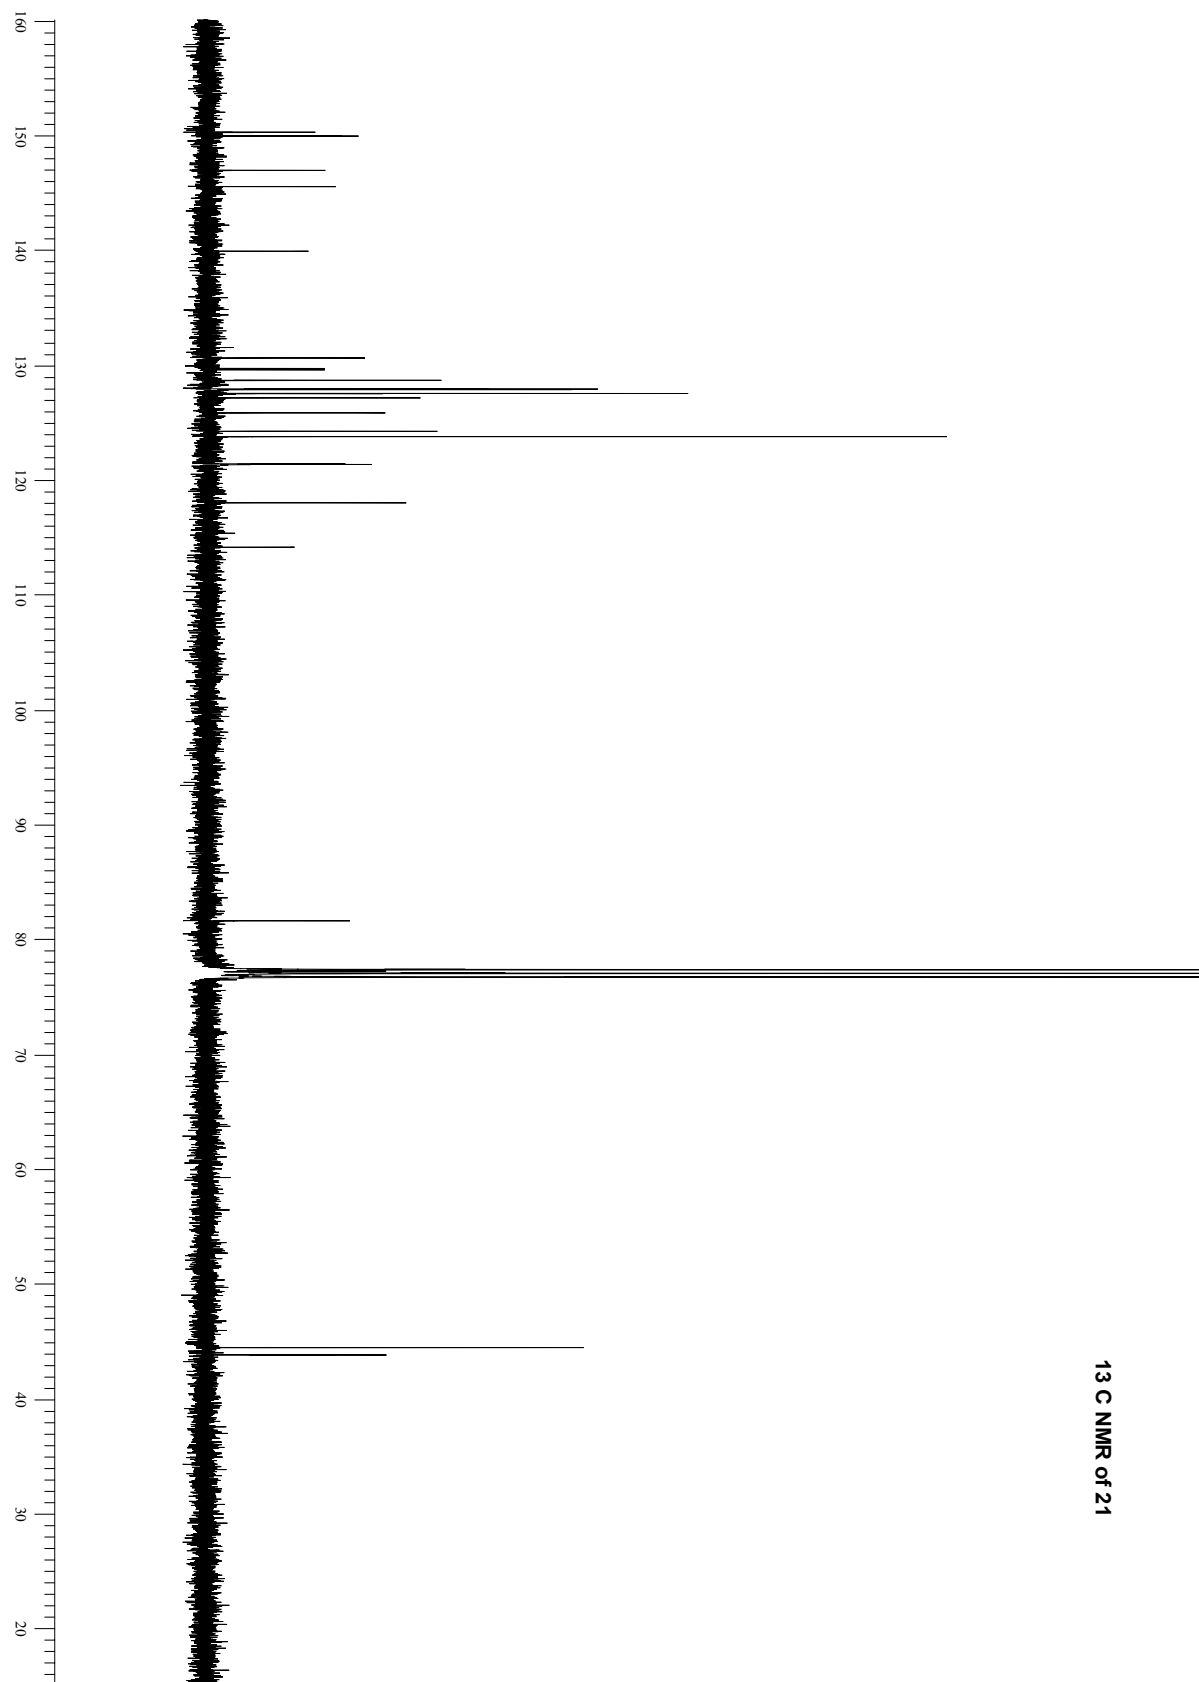

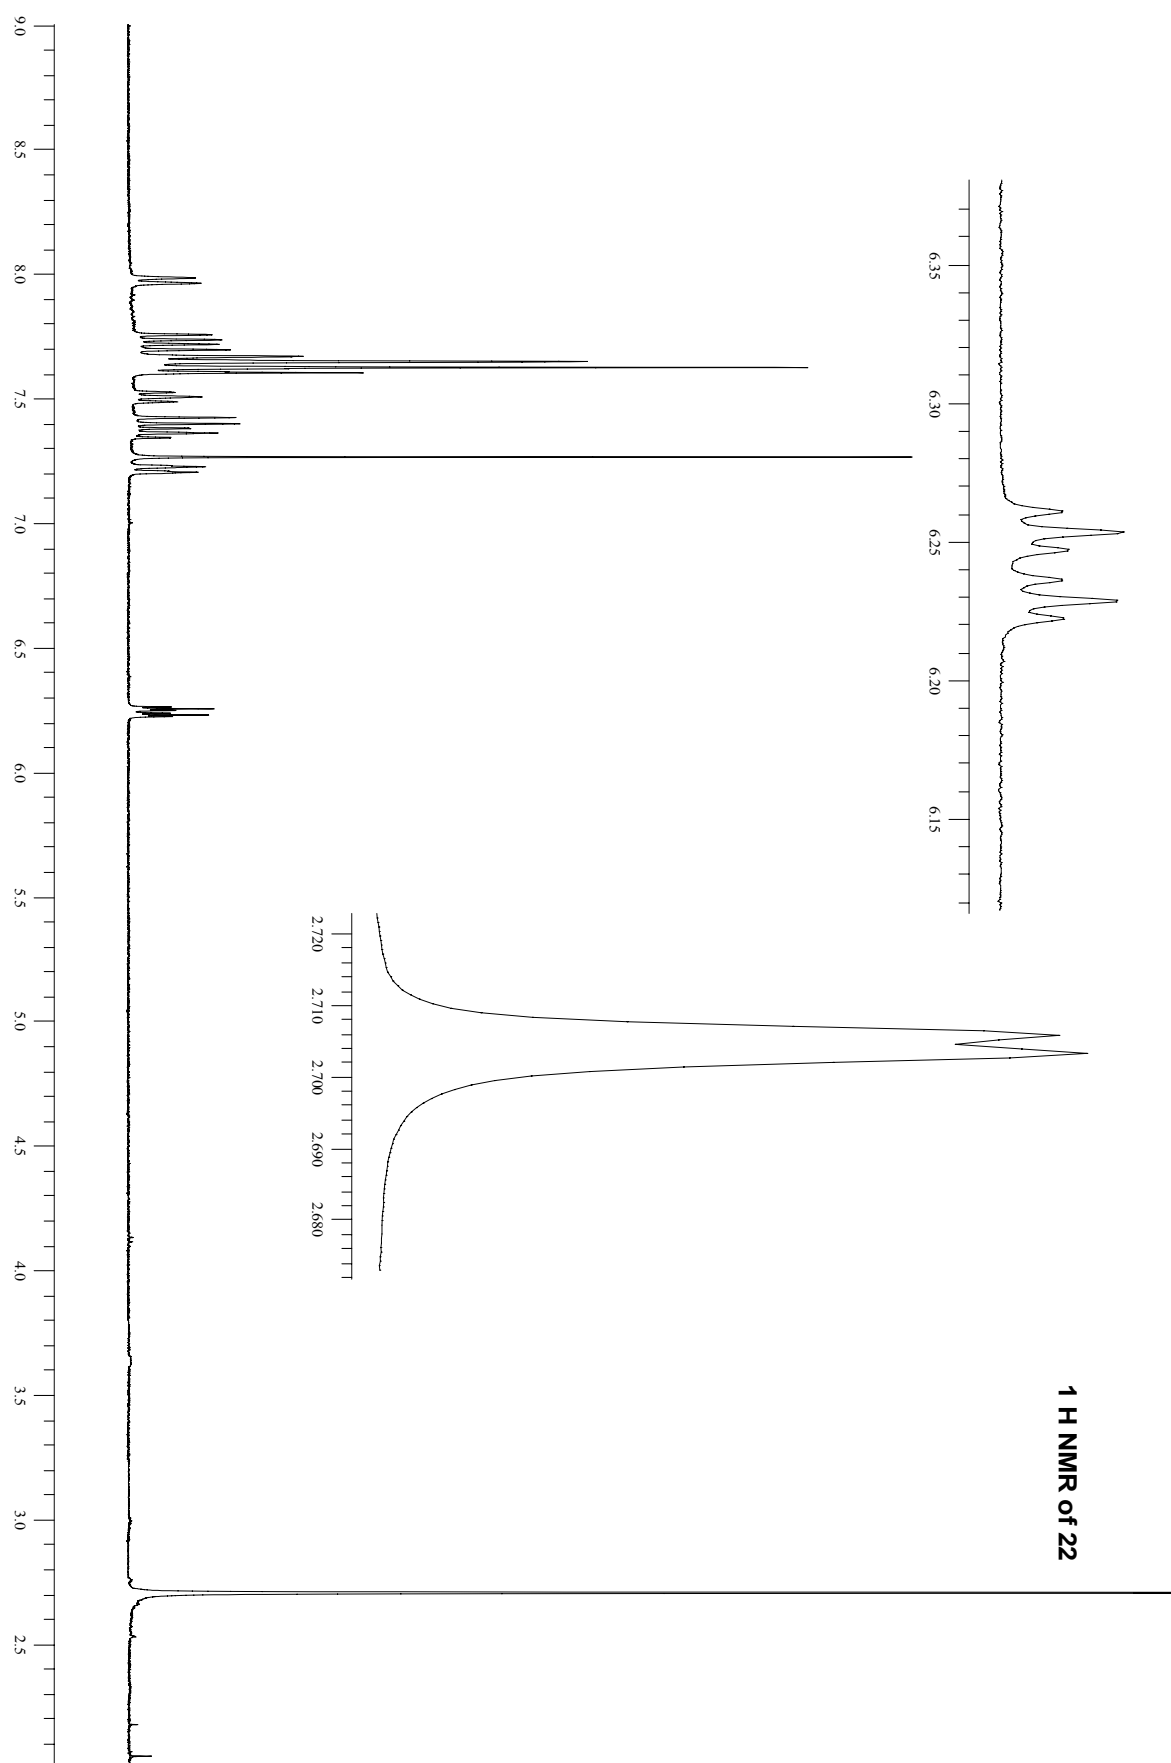

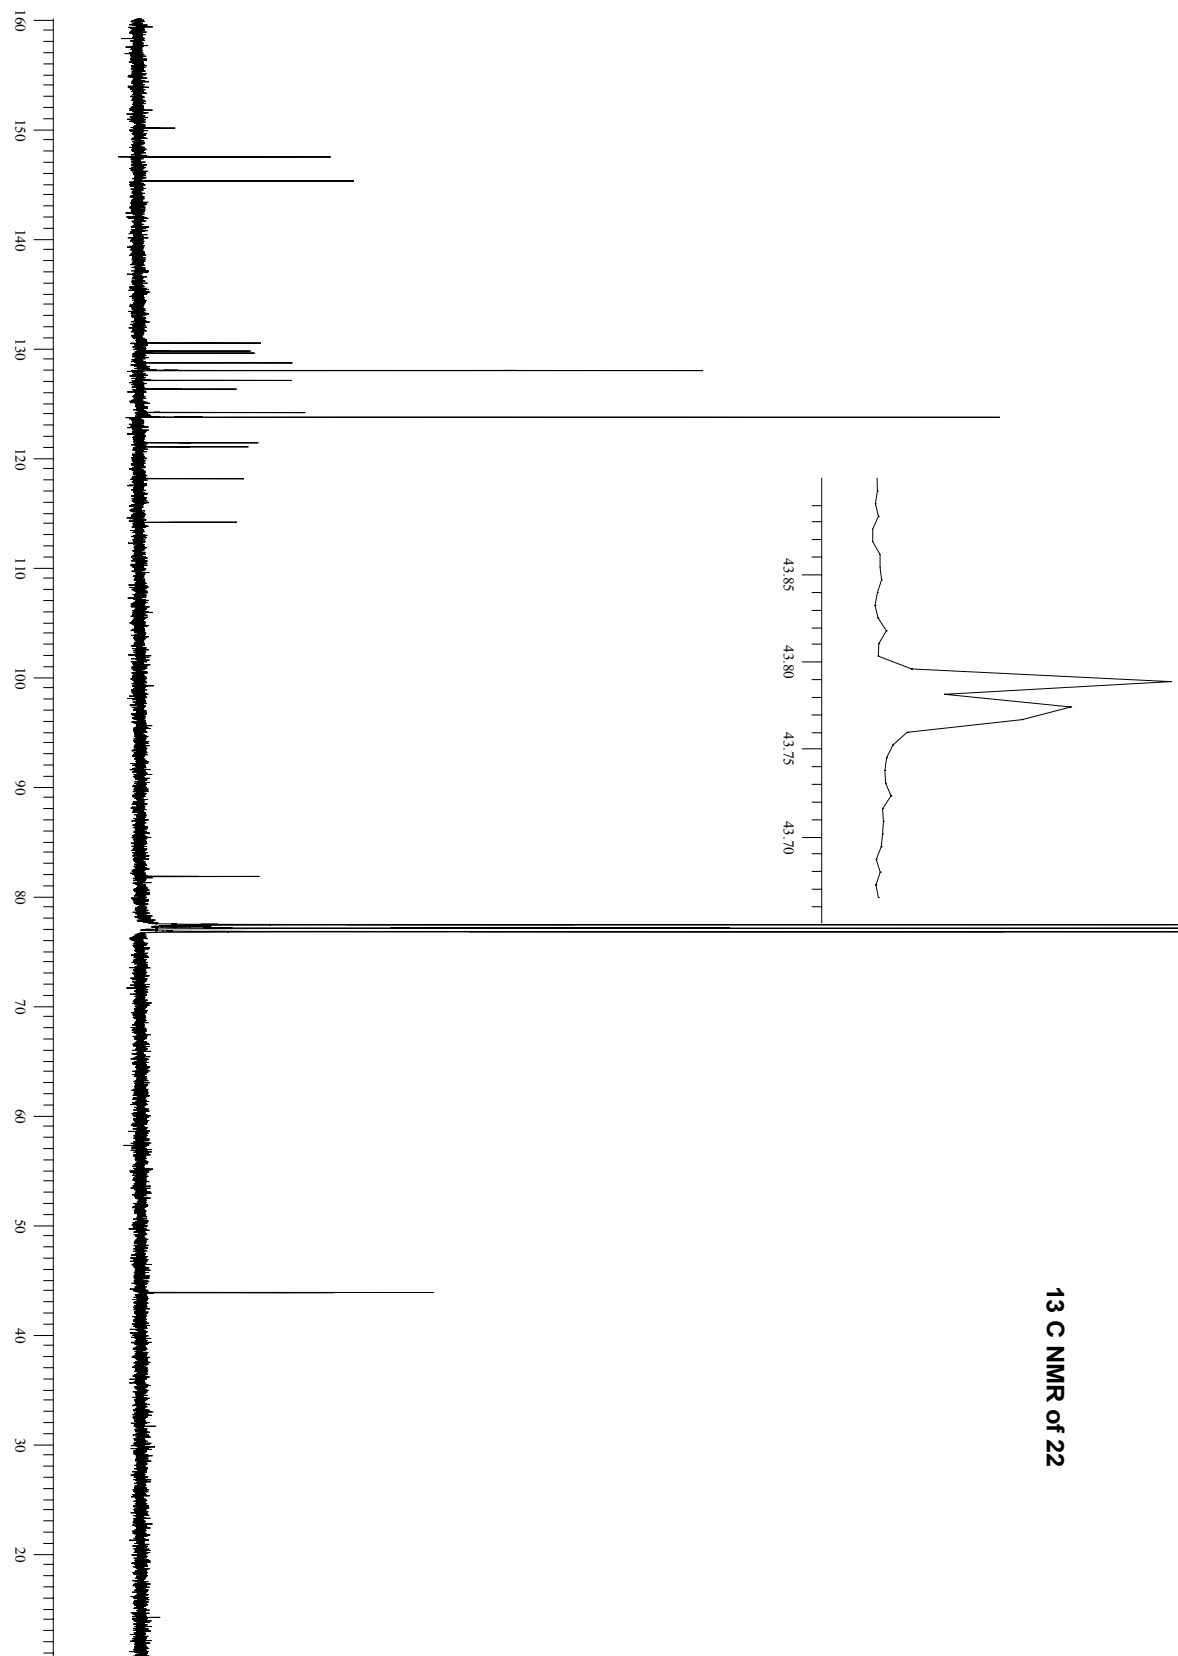

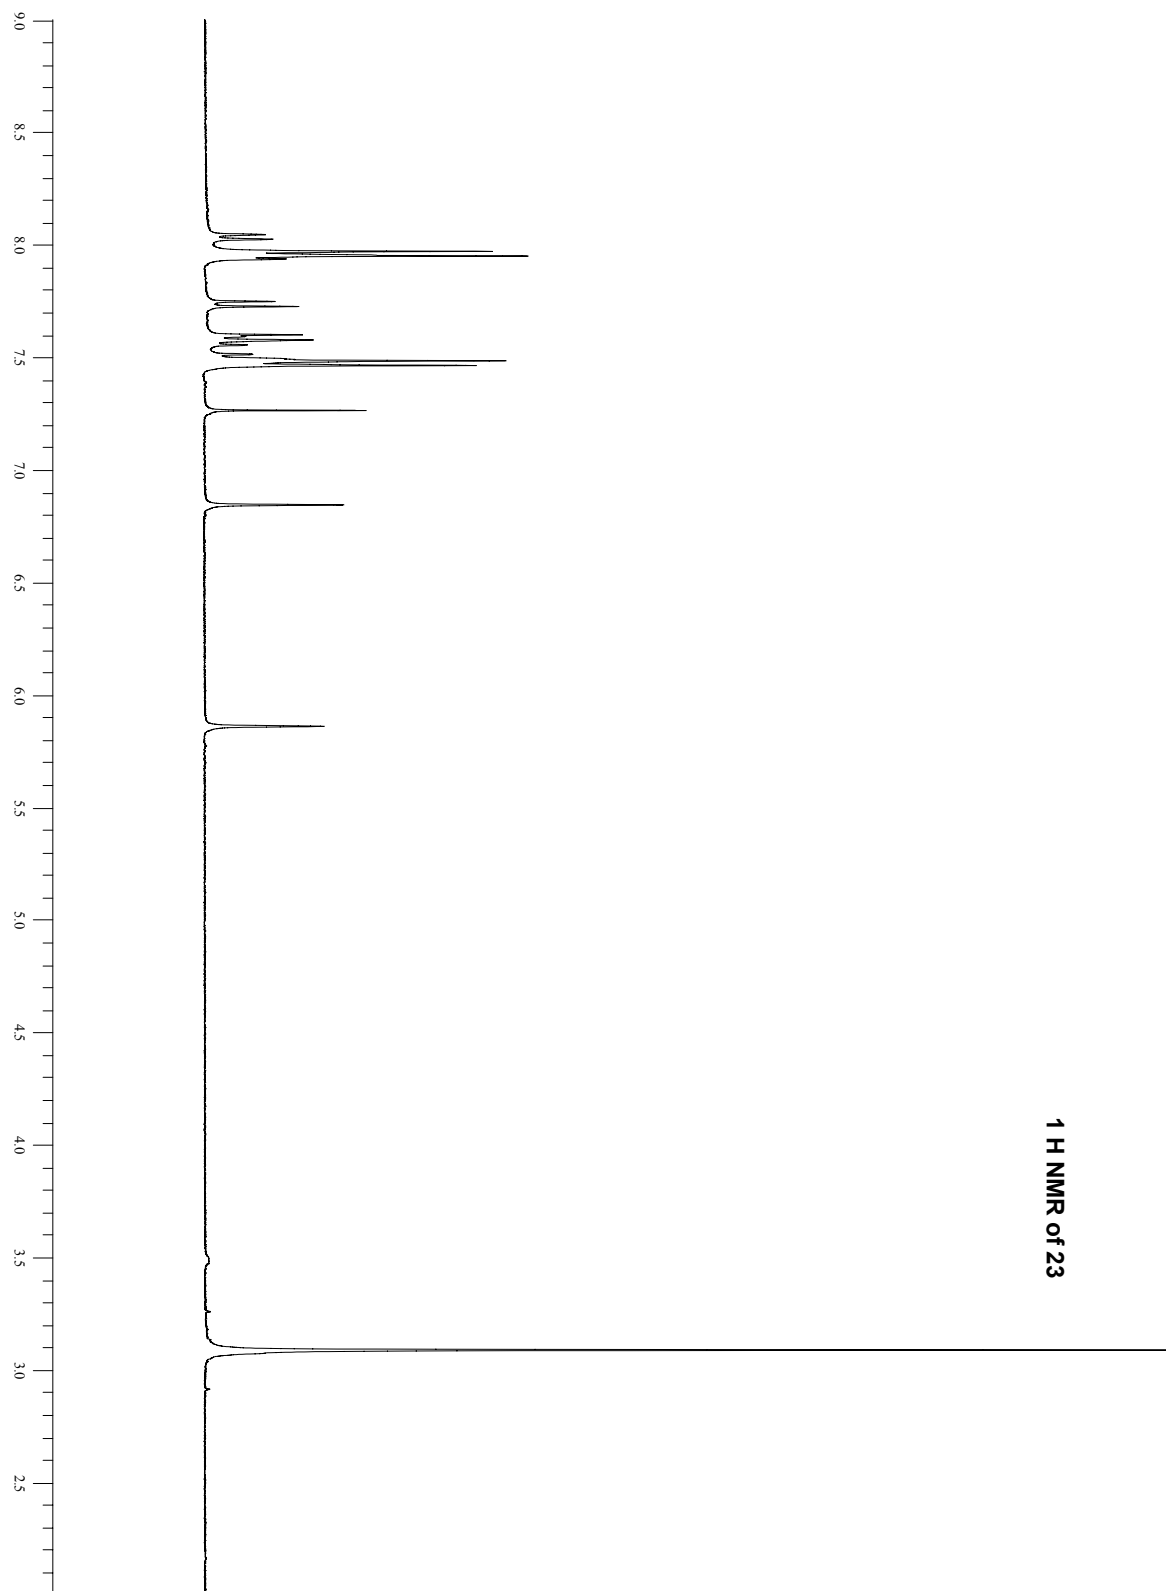

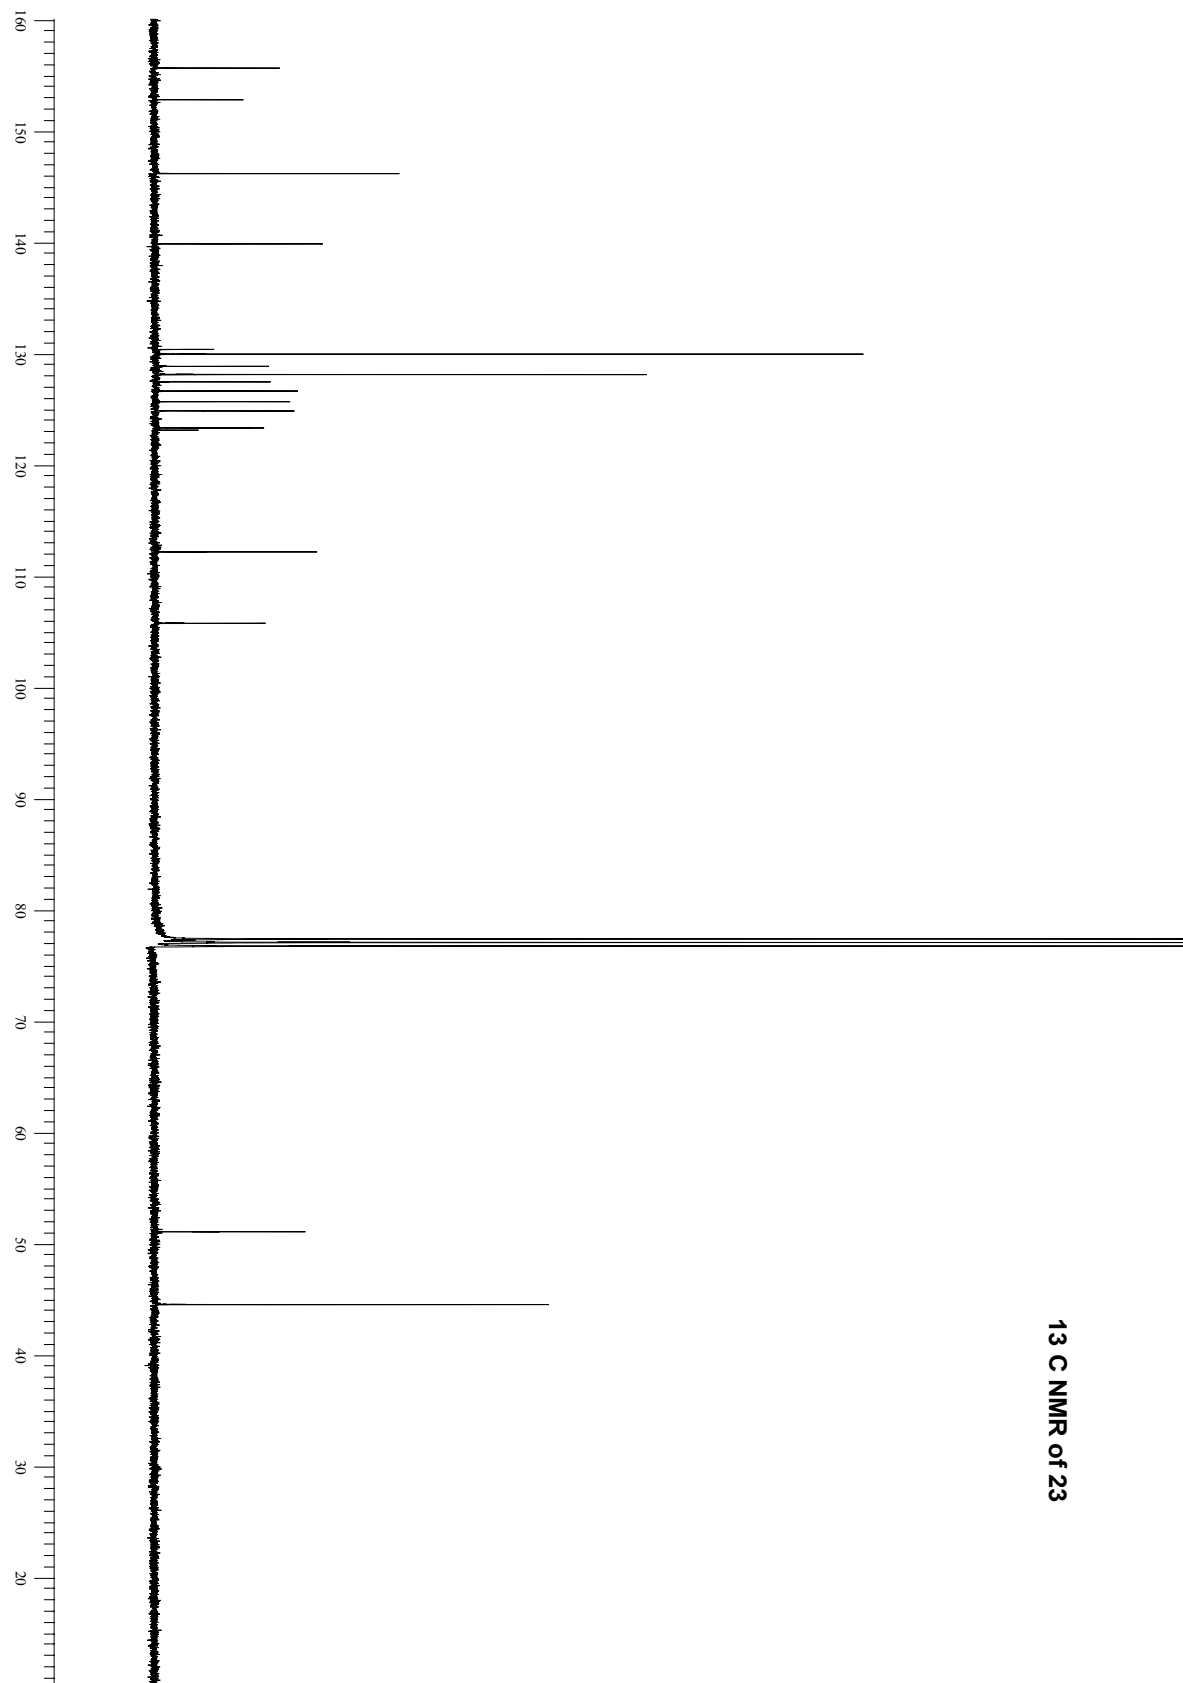

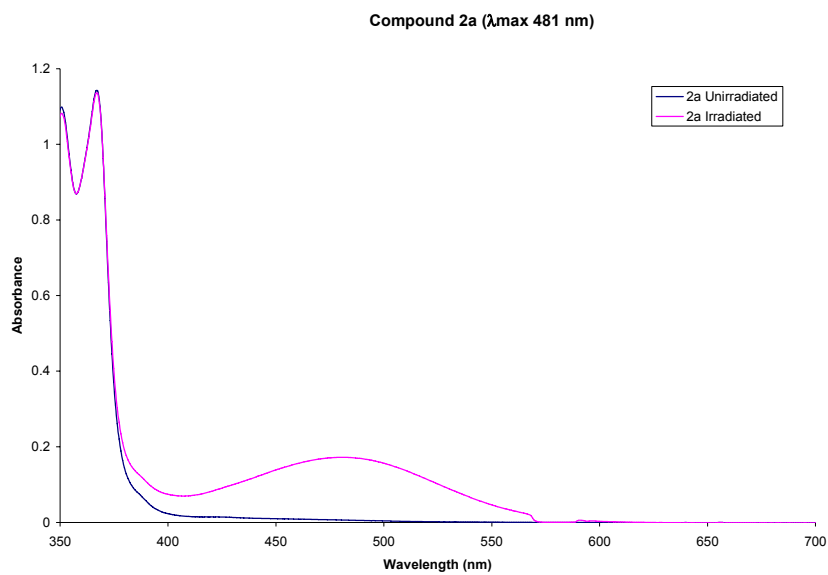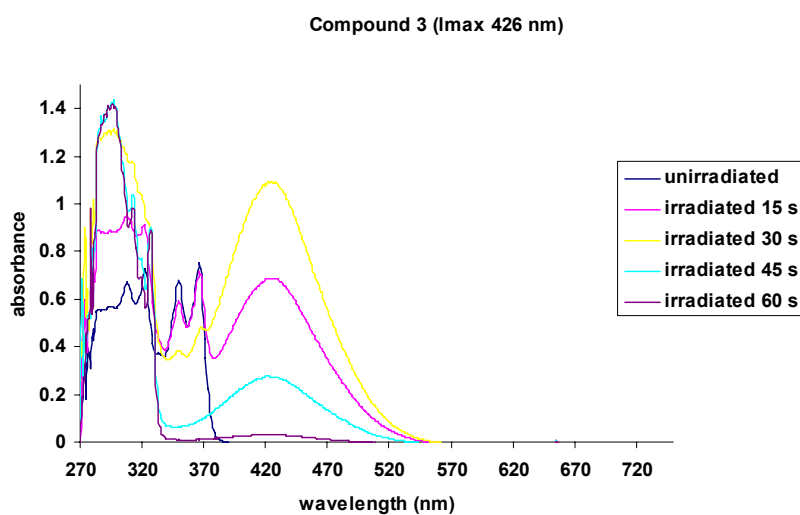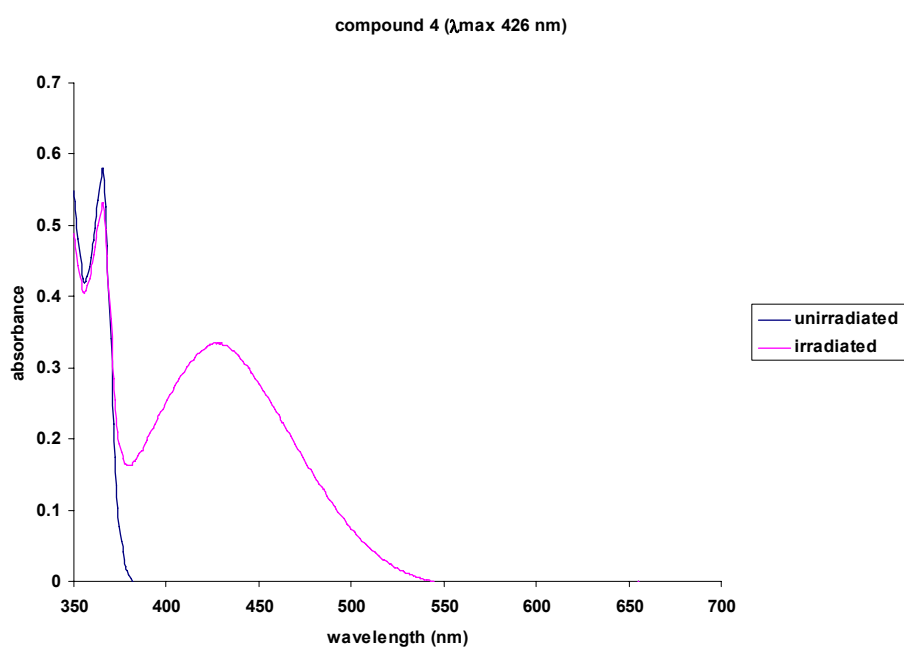

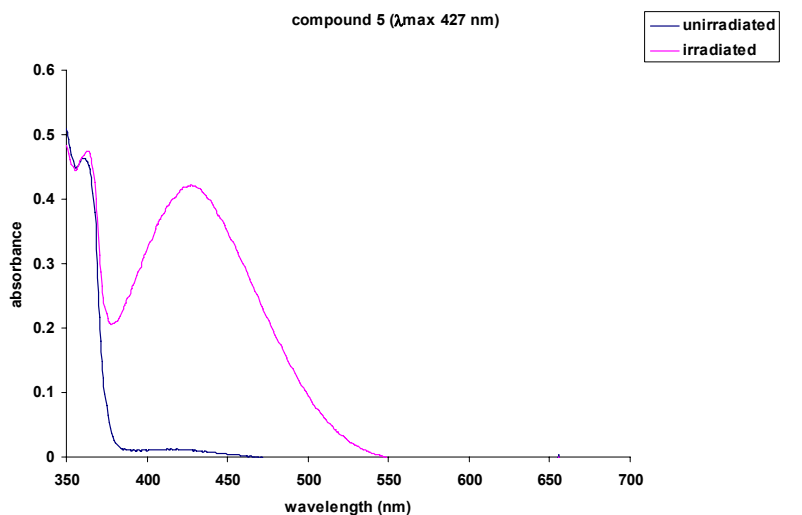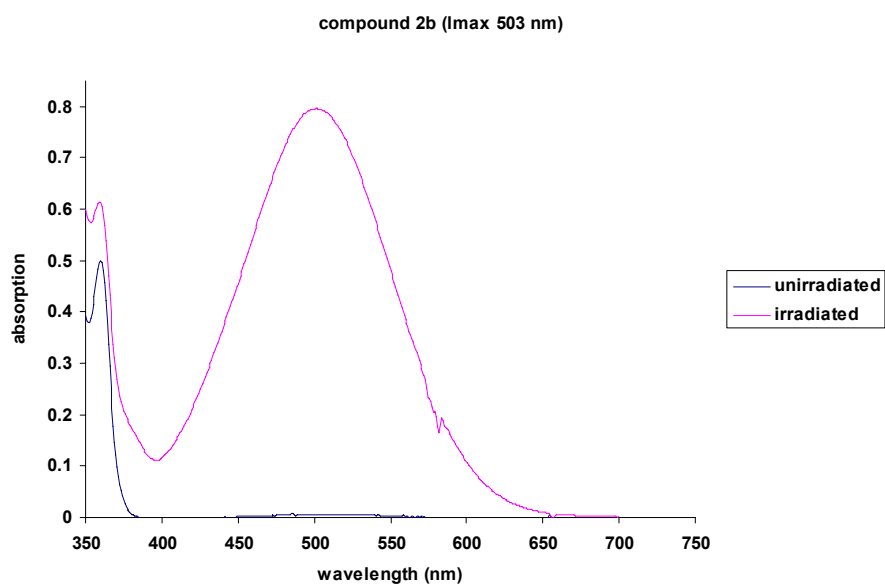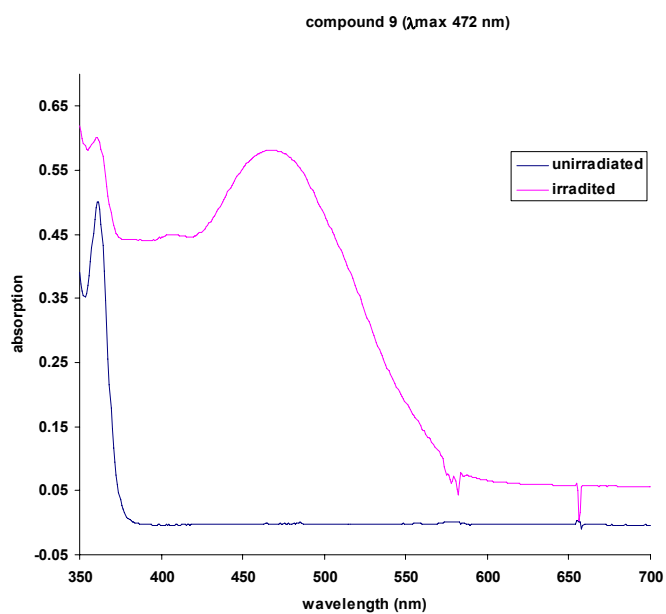

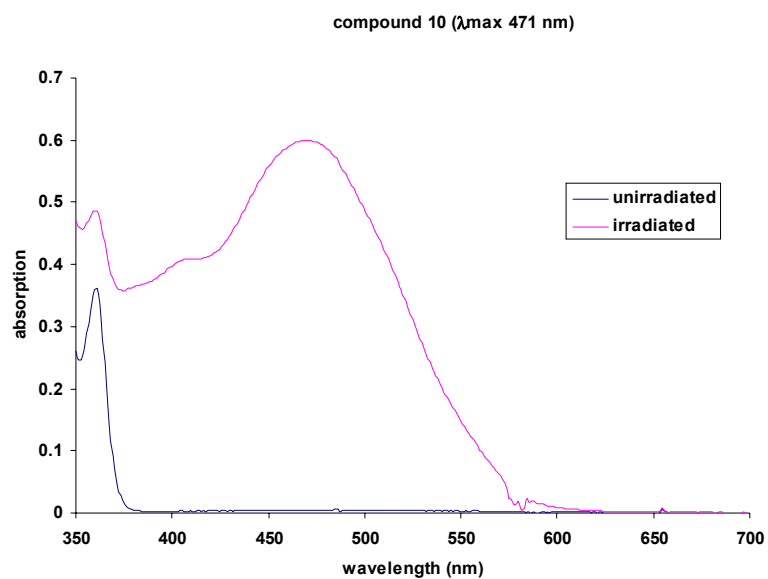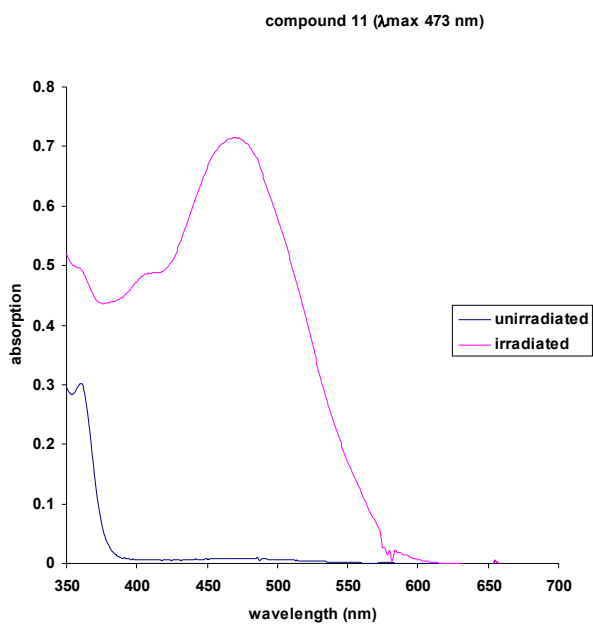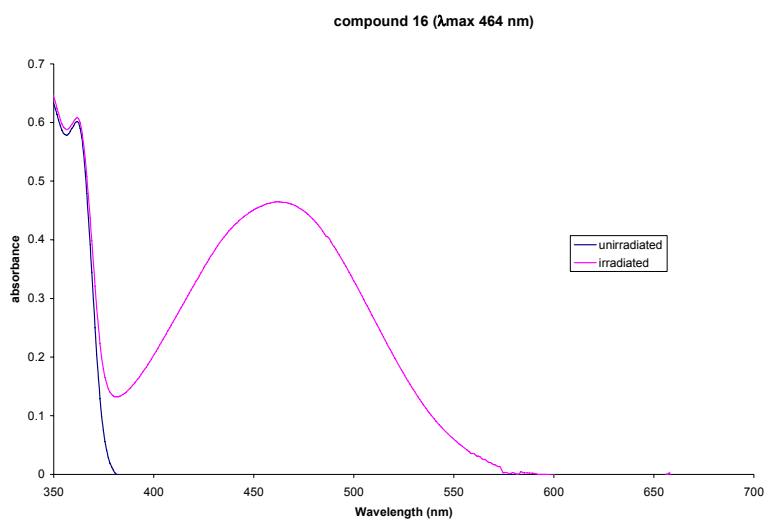



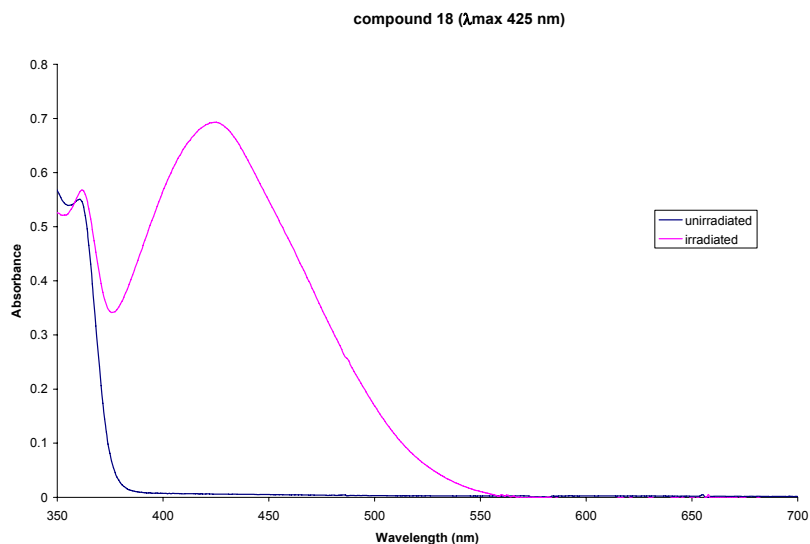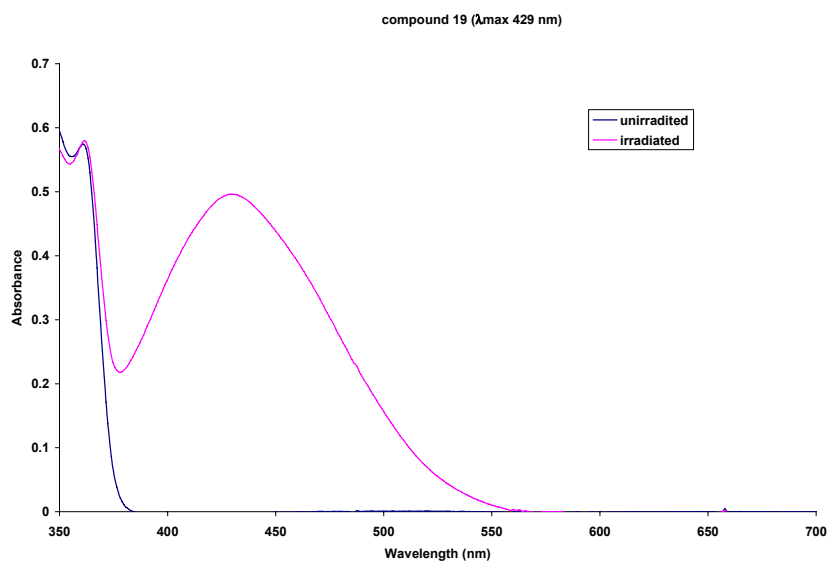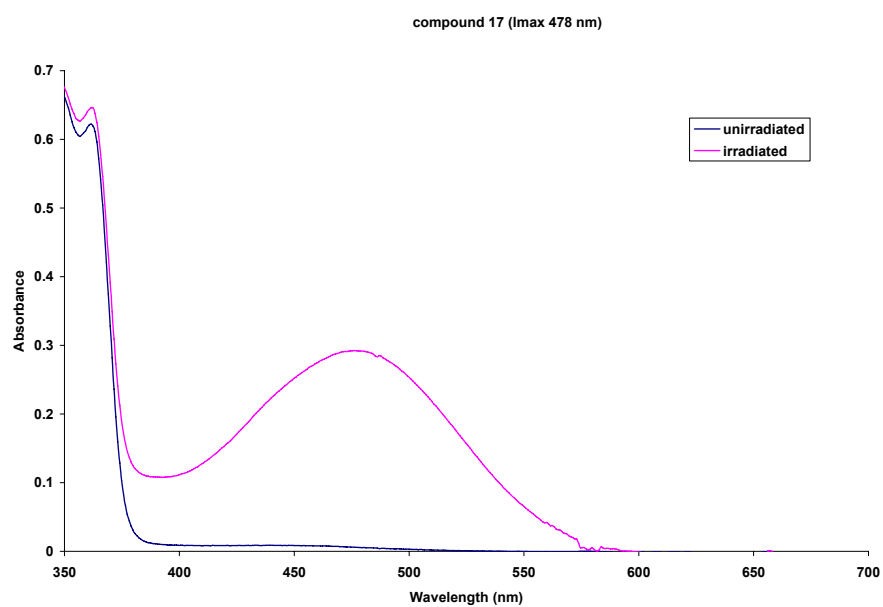

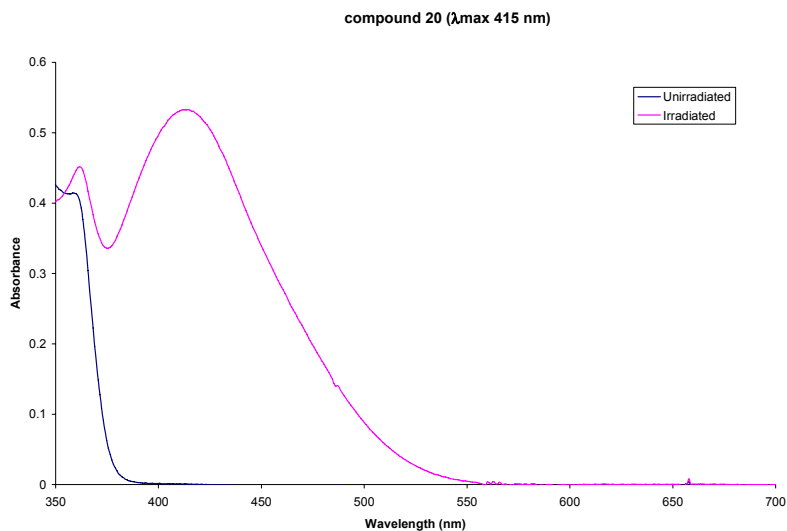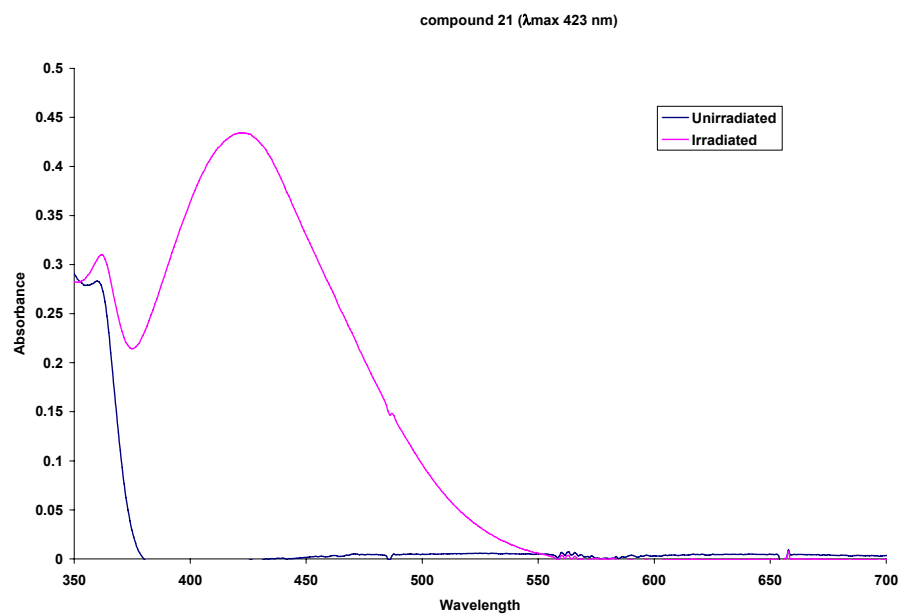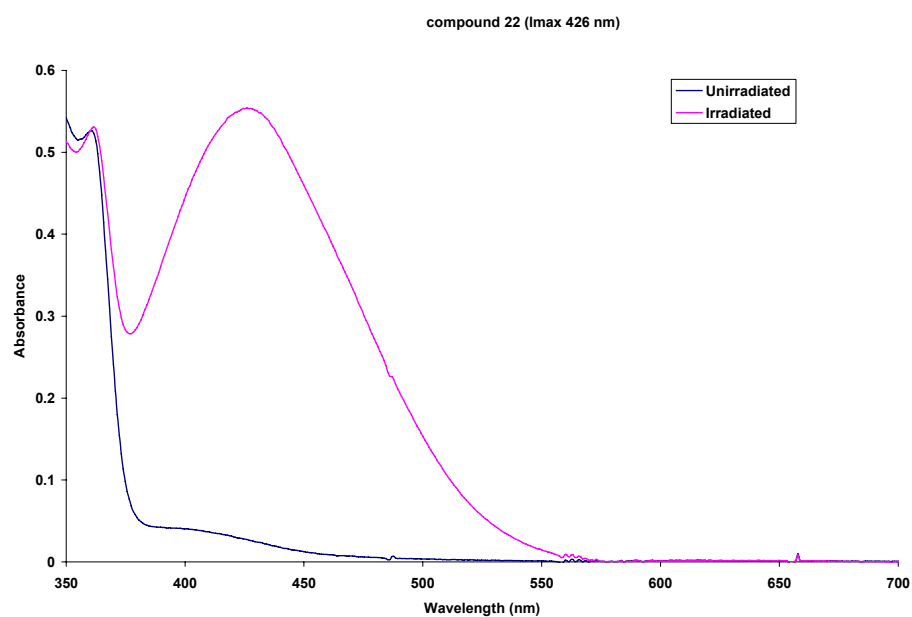

Supplement: b807744d.pdf [file b807744d.pdf]
